# Supplementary material for: A convenient approach for the deprotection and scavenging of the PMB group using POCl3
Source: Royal Society of Chemistry journal article supplement (doi:10.1039/c3ra42113a), 2013-01-01

## Supporting Information

### First example of POCl<sub>3</sub> as a Single Reagent for PMB Group Deprotection and Scavenging

**Andivelu Ilangovan<sup>a\*</sup>, Shanmugasundar Saravanakumar<sup>a, b</sup>, Subramani  
Malayappasamy<sup>a</sup> and Govindaswamy Manickam<sup>b</sup>**

<sup>a</sup> School of Chemistry, Bharathidasan University, Tiruchirappalli – 620024, India. \*[ilangovanbdu@yahoo.com](mailto:ilangovanbdu@yahoo.com)

<sup>b</sup> Syngene International Ltd., Bangalore - 560 099, India.

#### Table of Contents

|                                                                                                                     |          |
|---------------------------------------------------------------------------------------------------------------------|----------|
| <b>Mechanism for the POCl<sub>3</sub> mediated selective deprotection in the presence of cation scavenger</b> ..... | <b>2</b> |
| <b><sup>1</sup>H &amp; <sup>13</sup>C spectra</b> .....                                                             | <b>3</b> |

**Proposed mechanism for the POCl<sub>3</sub> mediated selective deprotection in the presence of cation scavenger (dodecane thiol)**

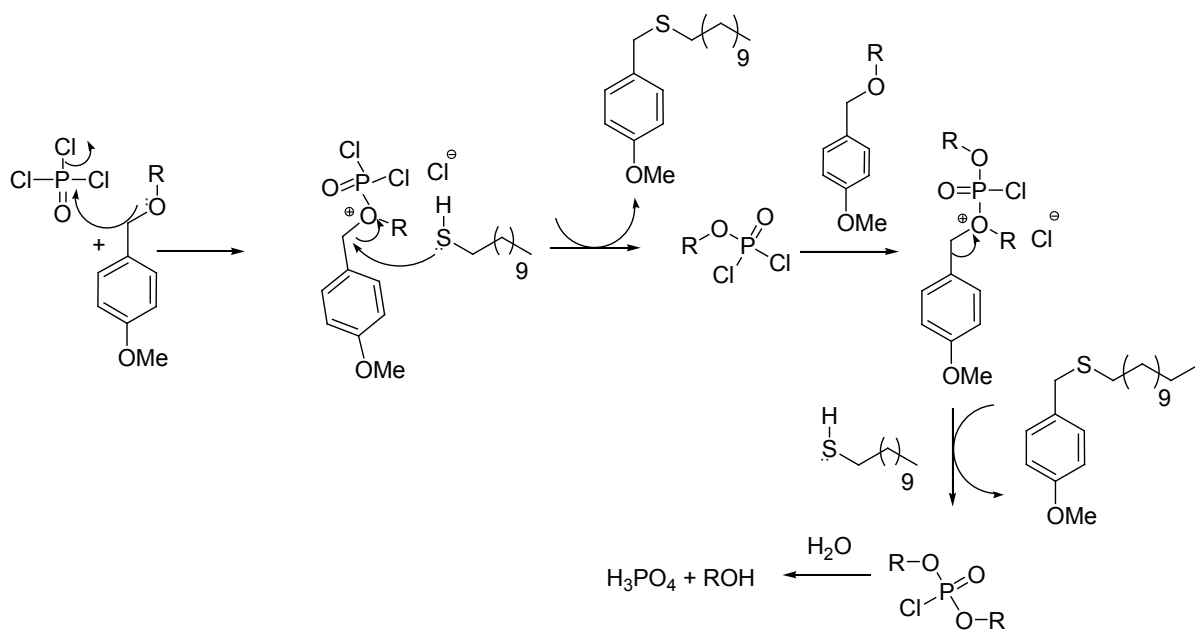

**<sup>1</sup>H-NMR and <sup>13</sup>C-NMR spectra for individual compounds.**

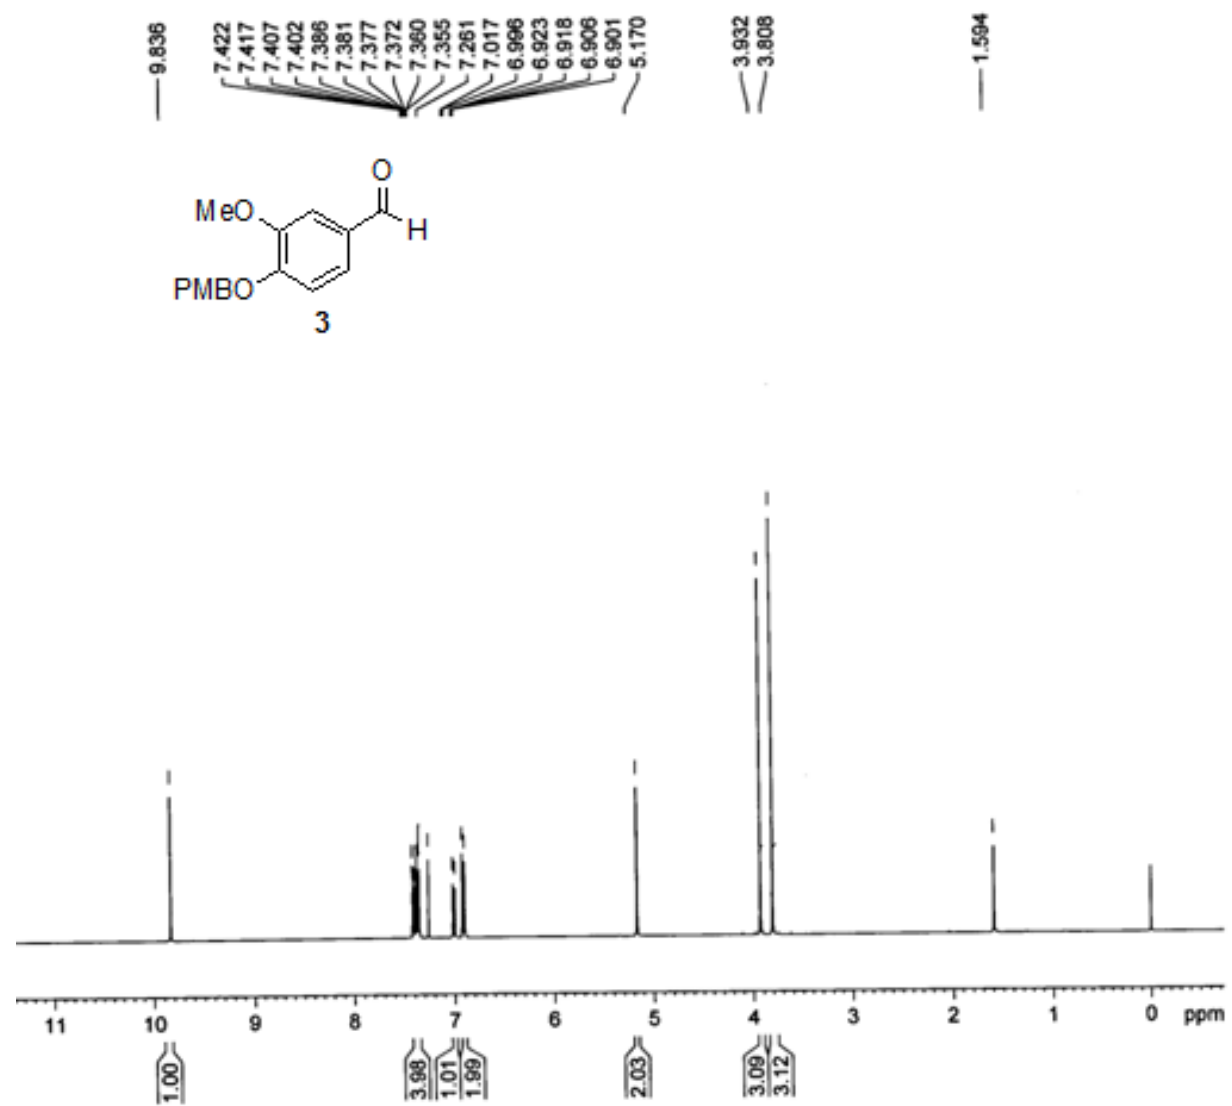

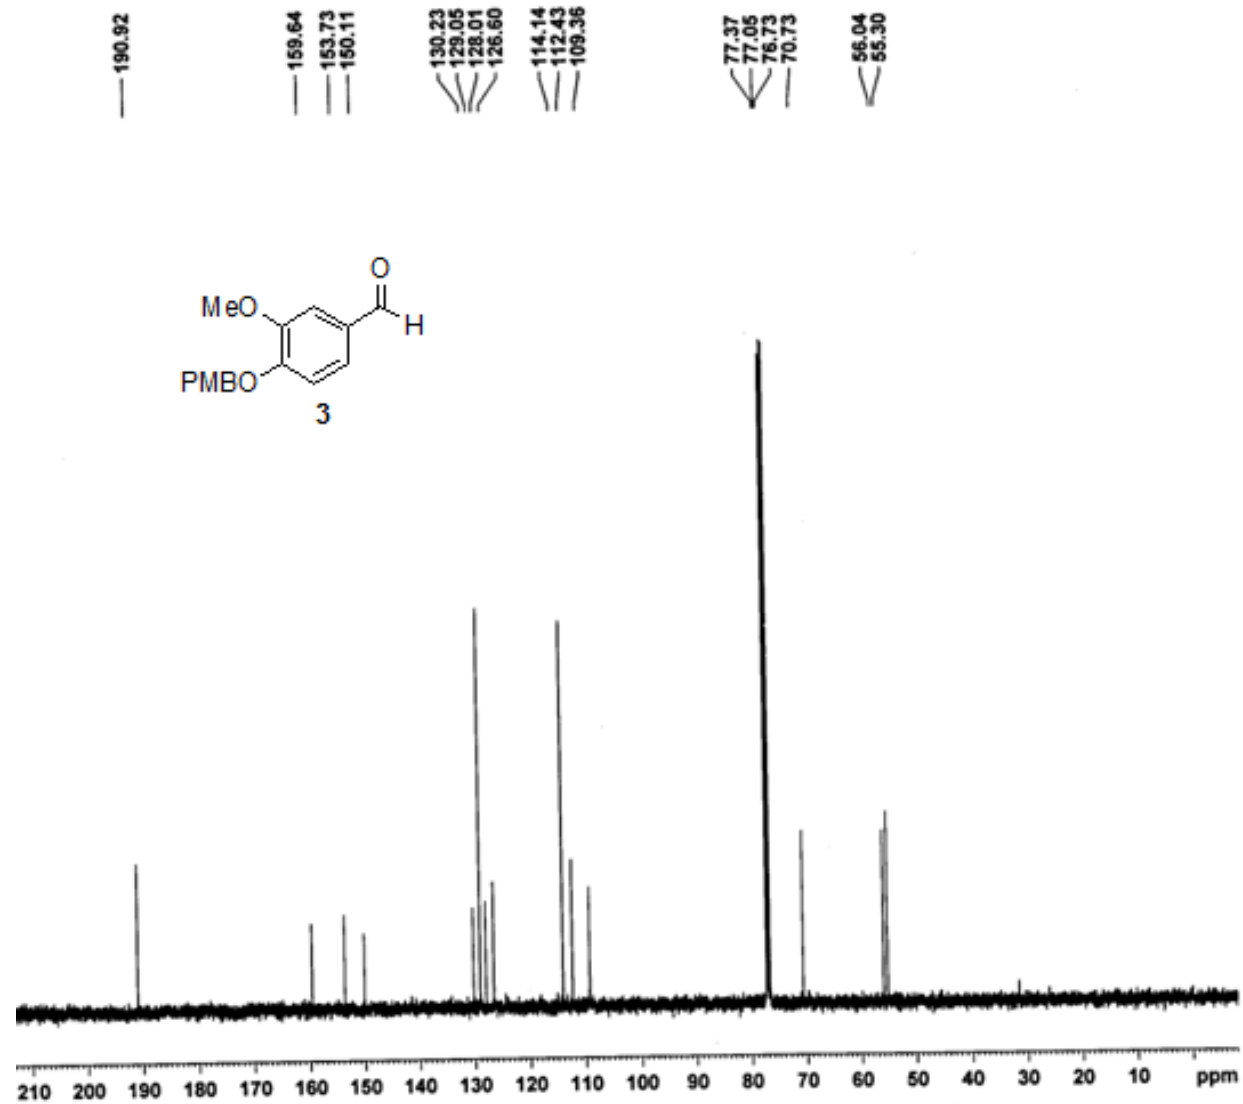

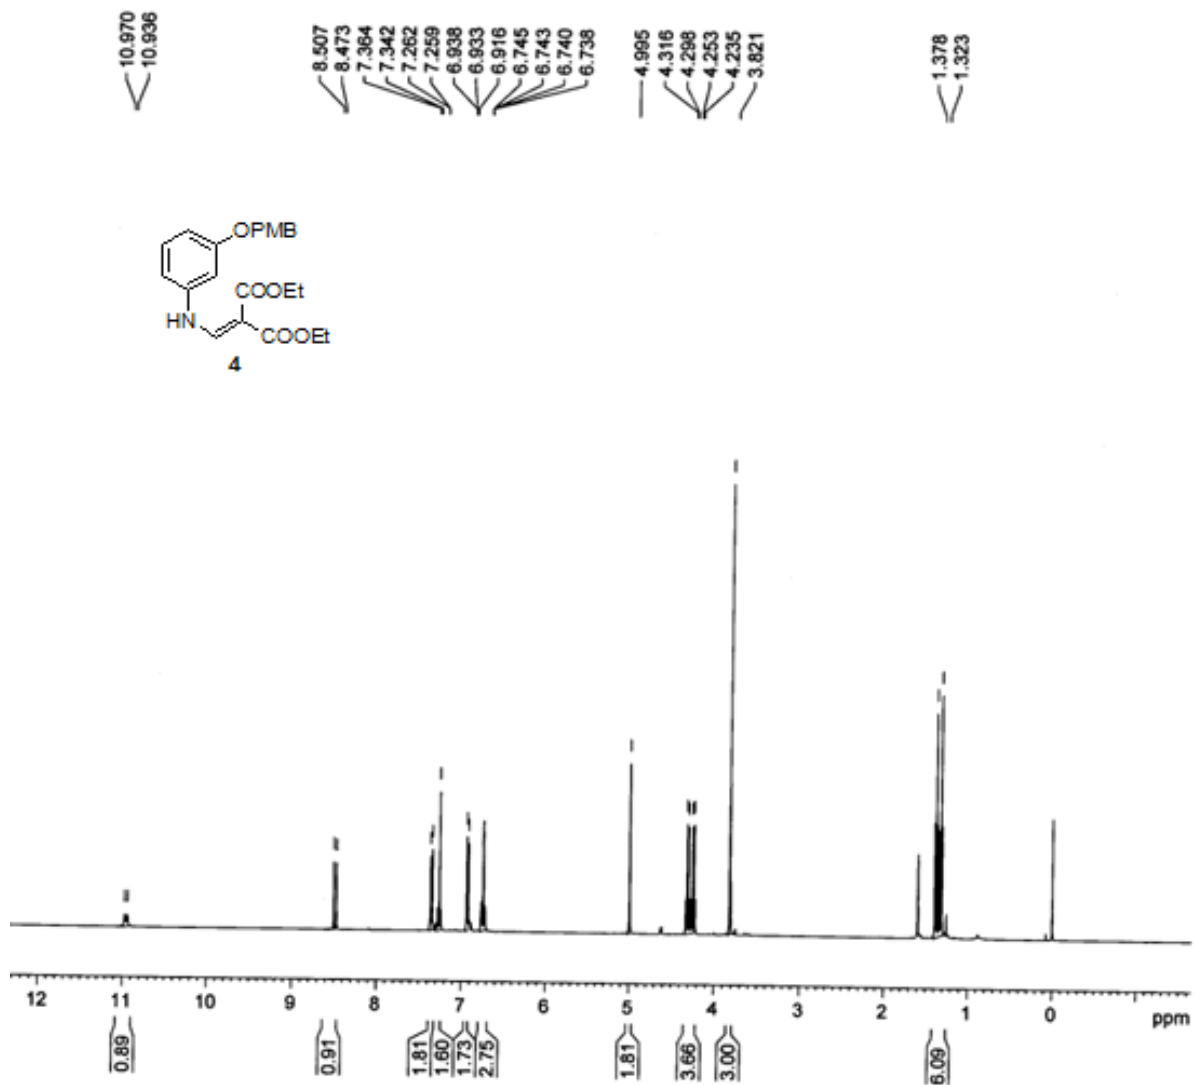

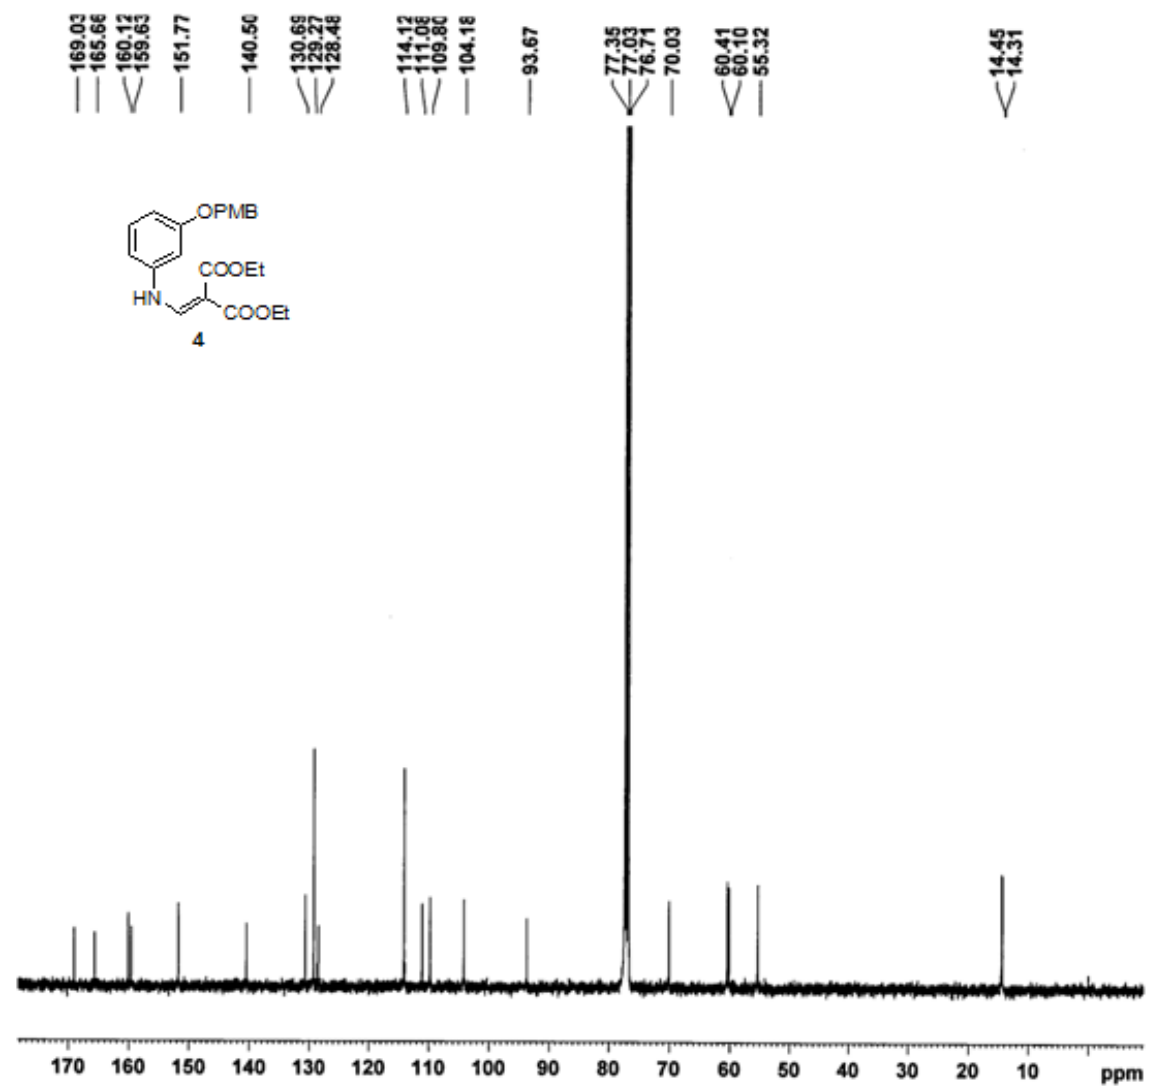

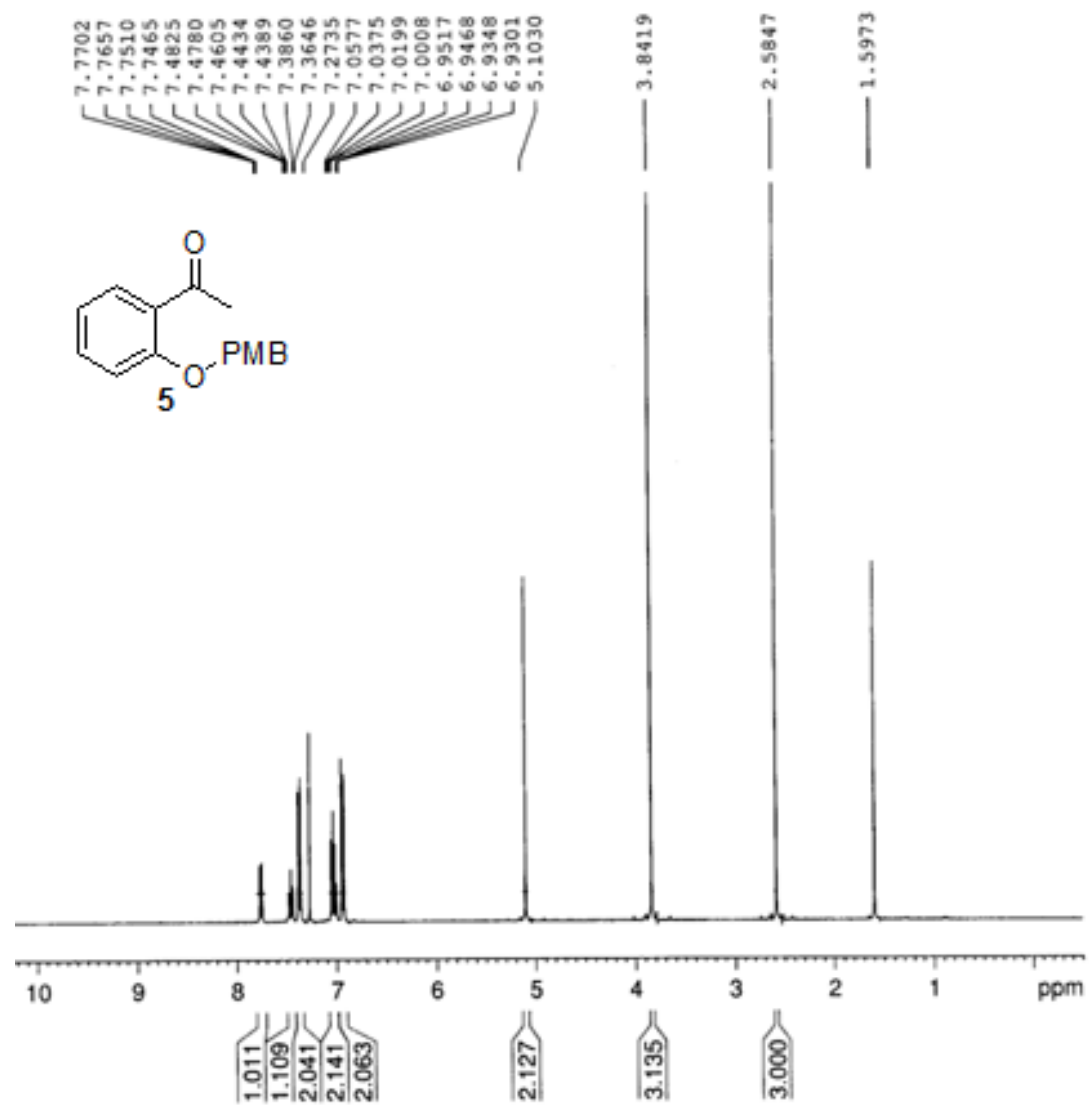



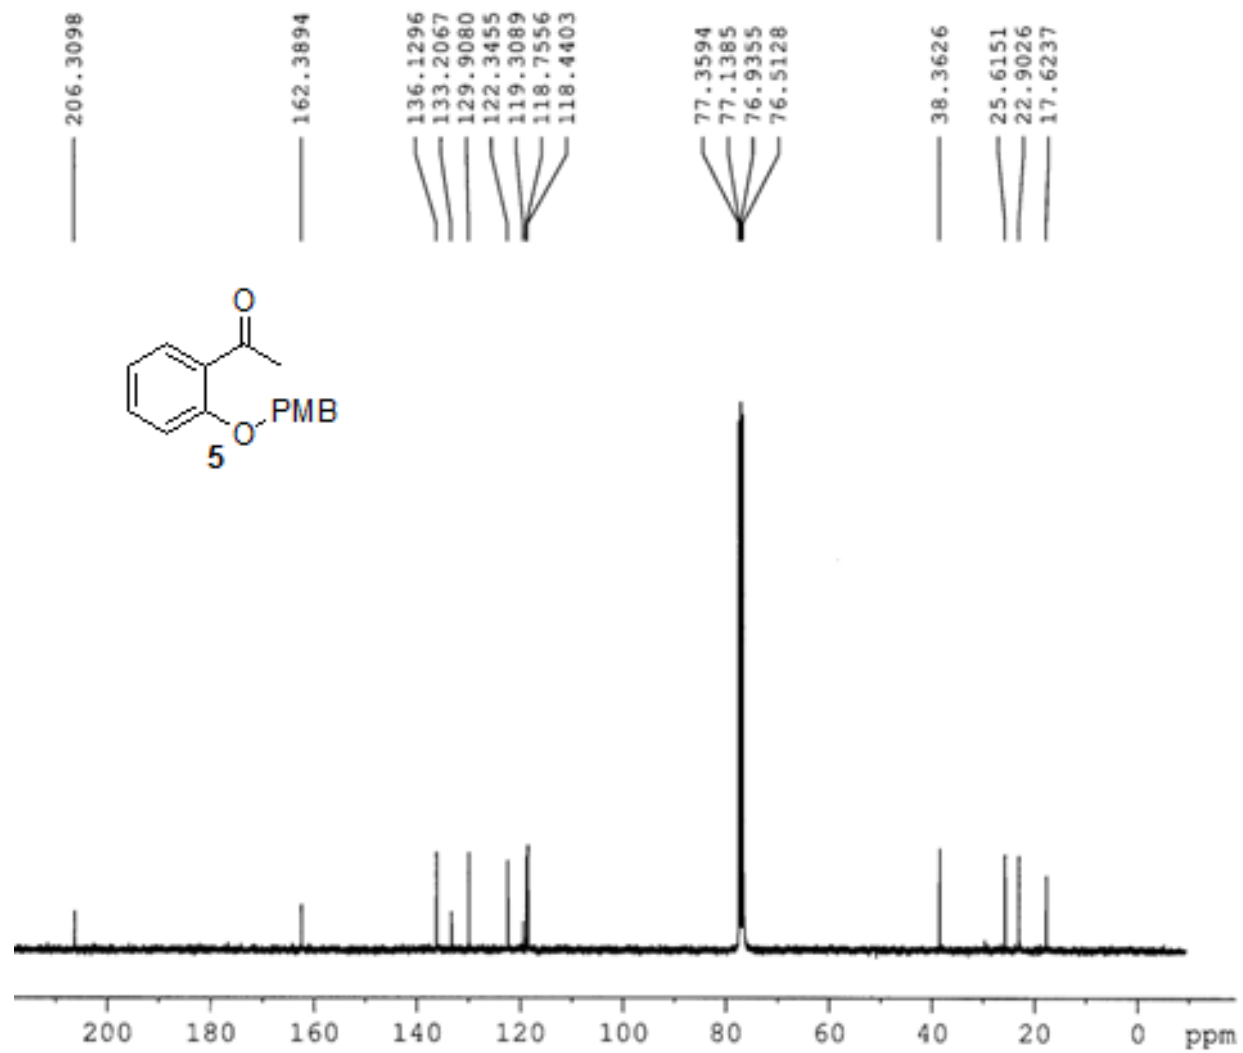

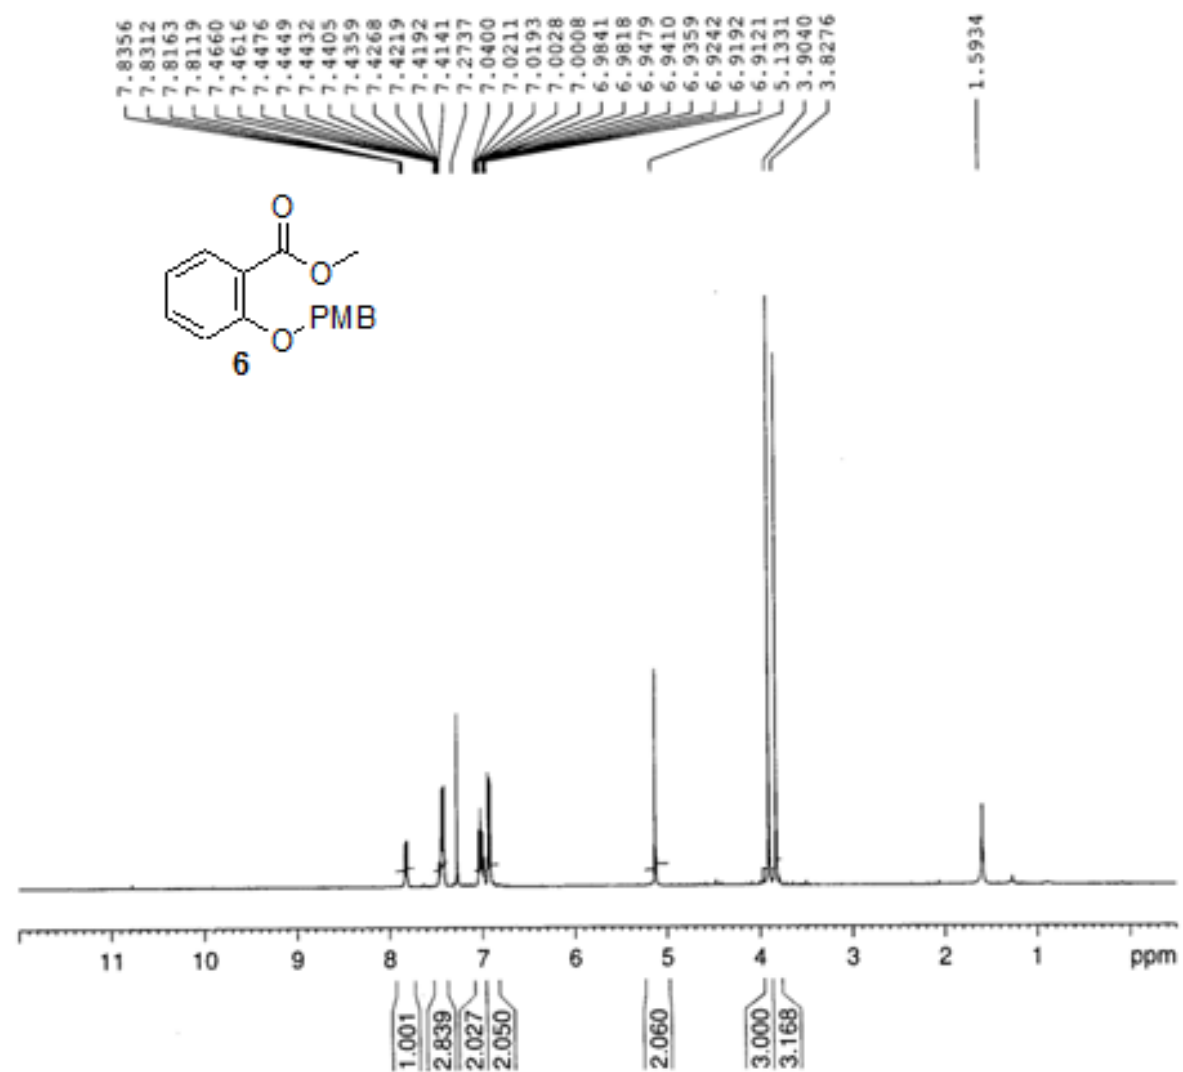

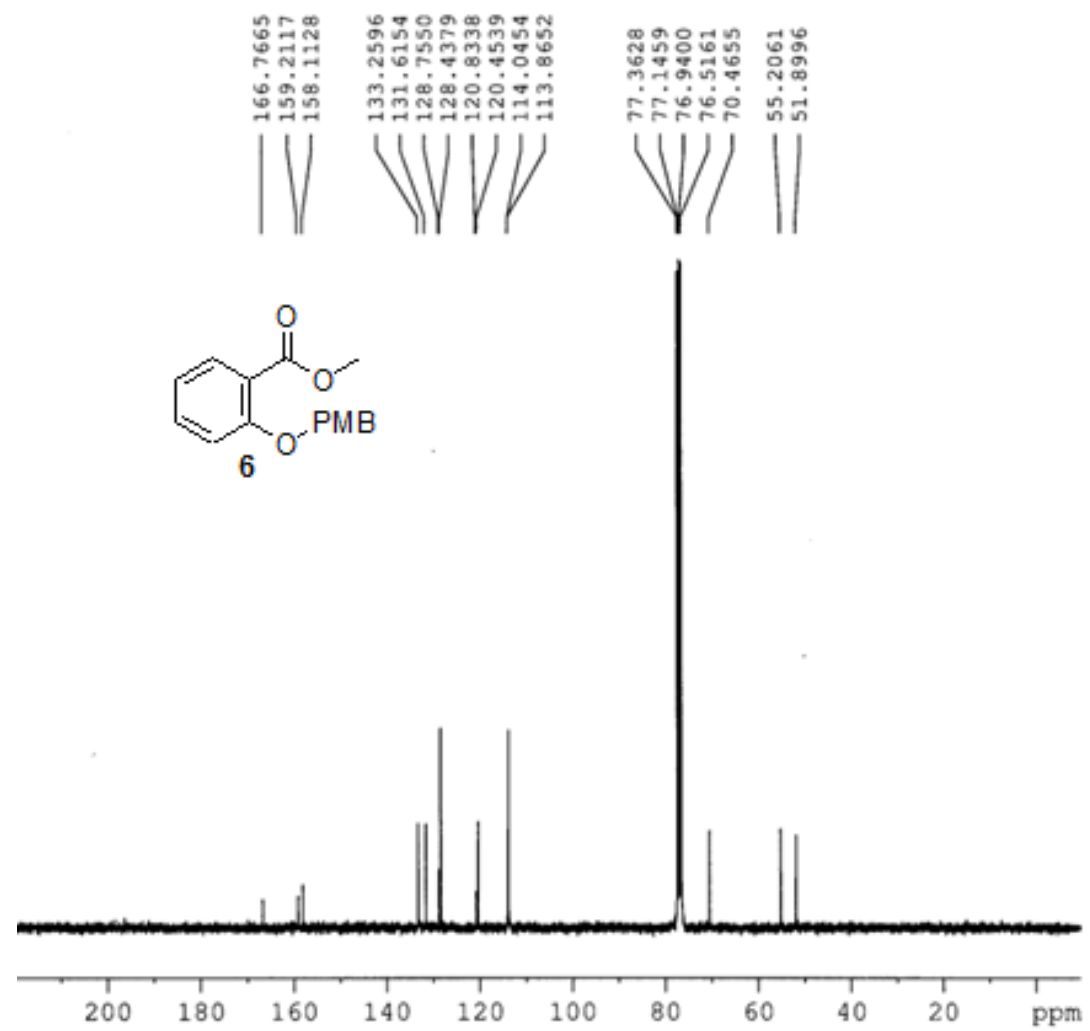

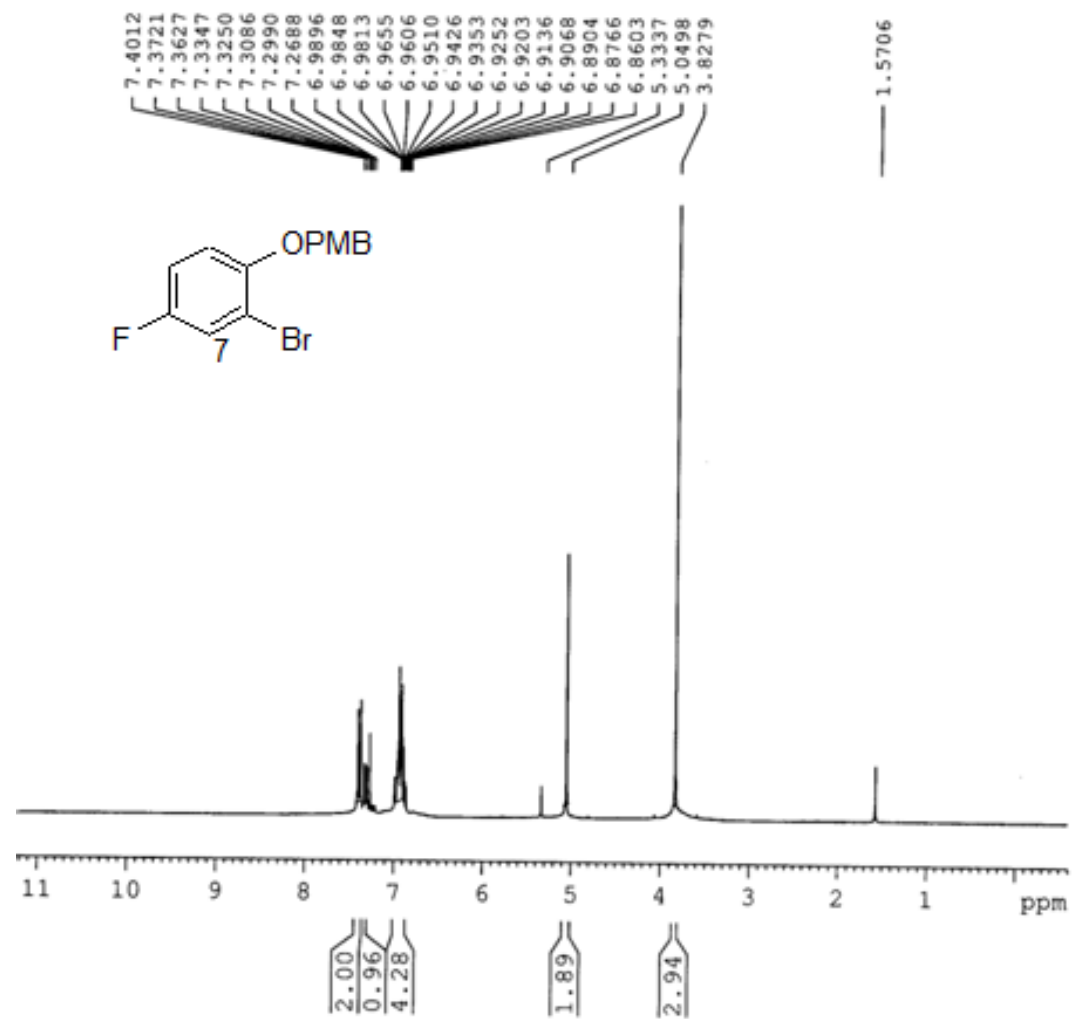

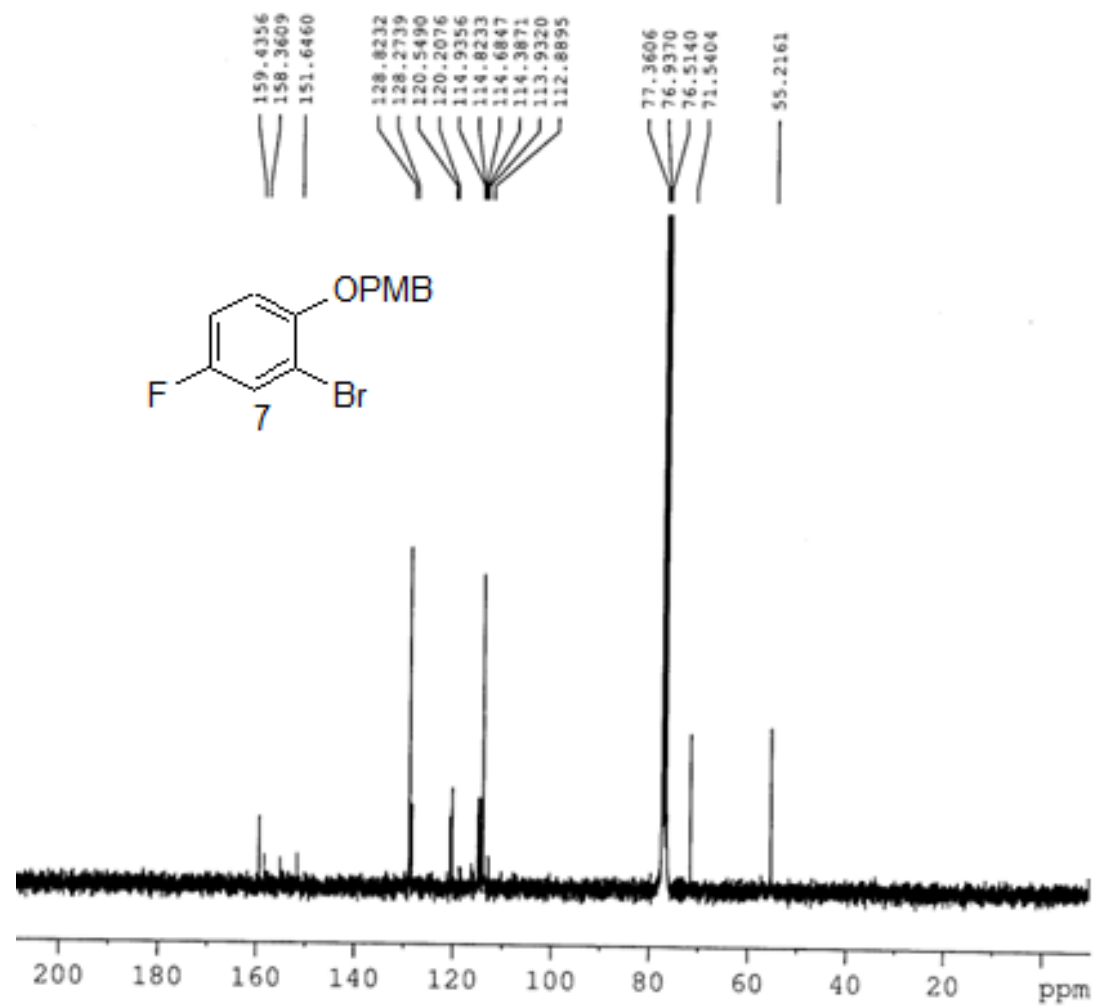

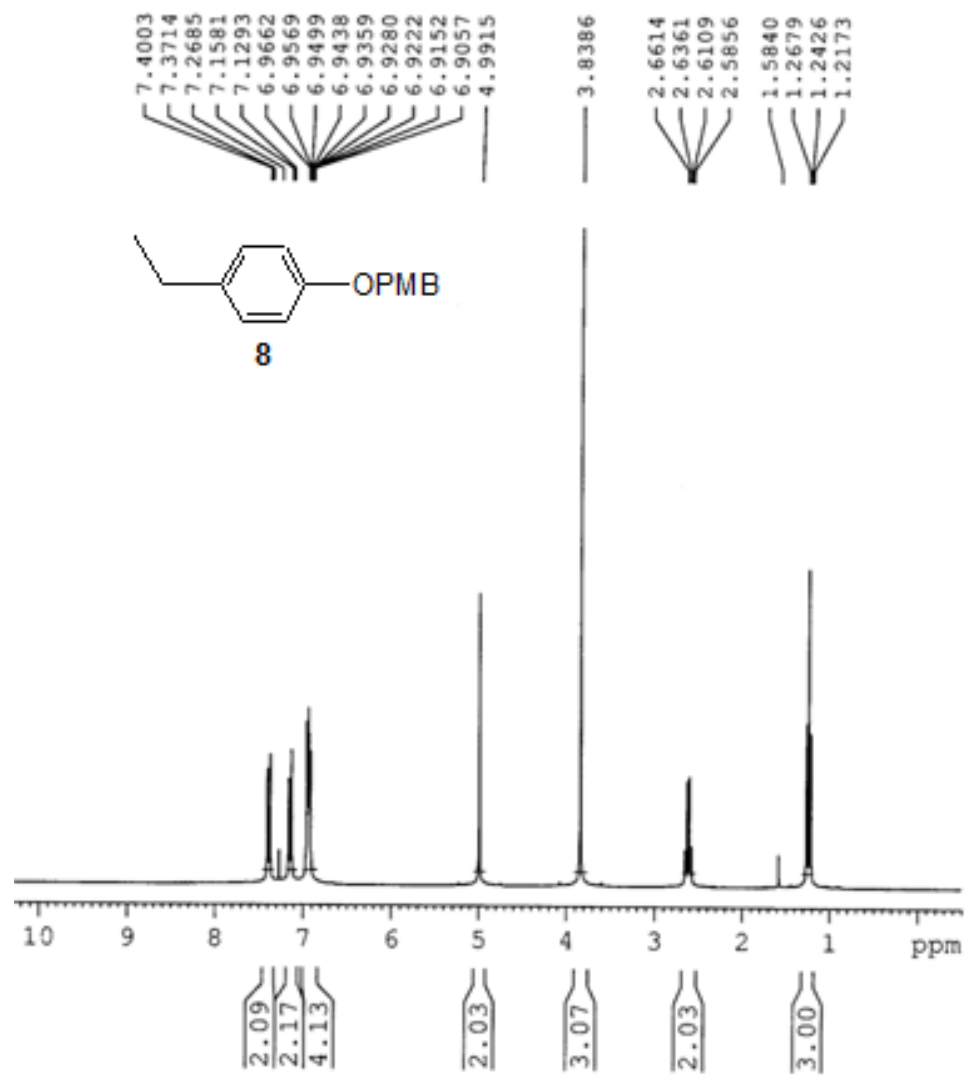

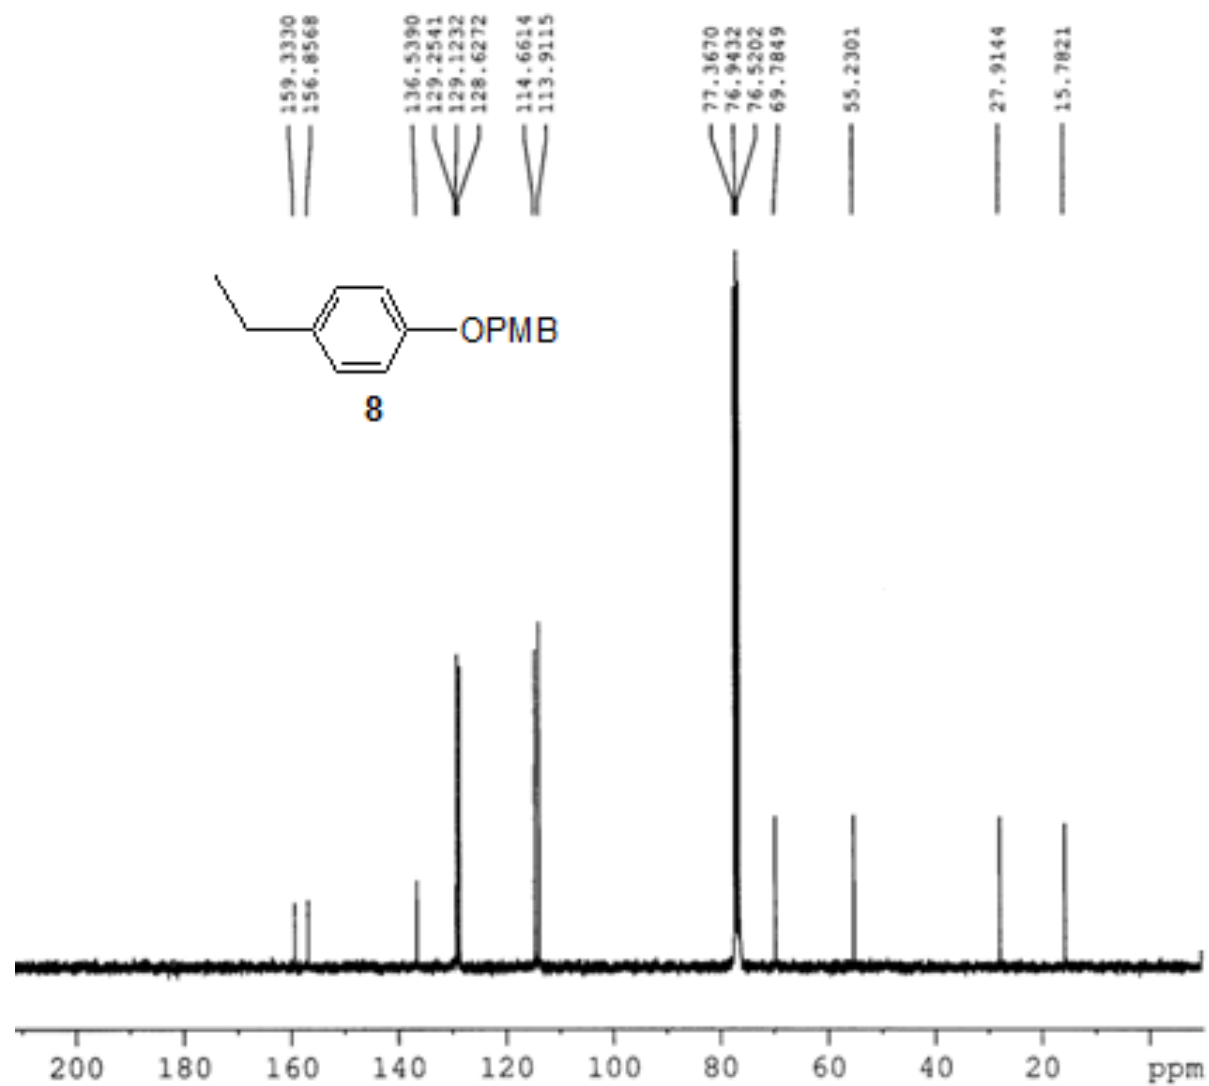

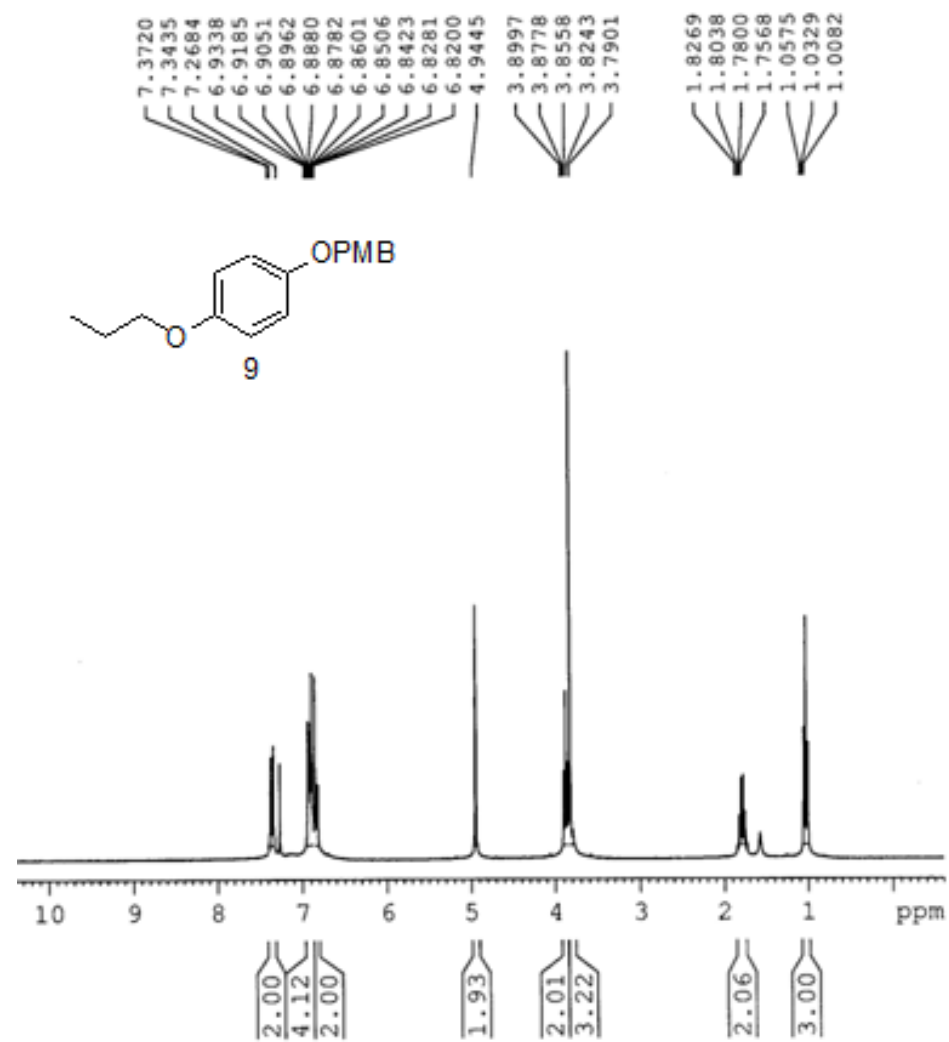



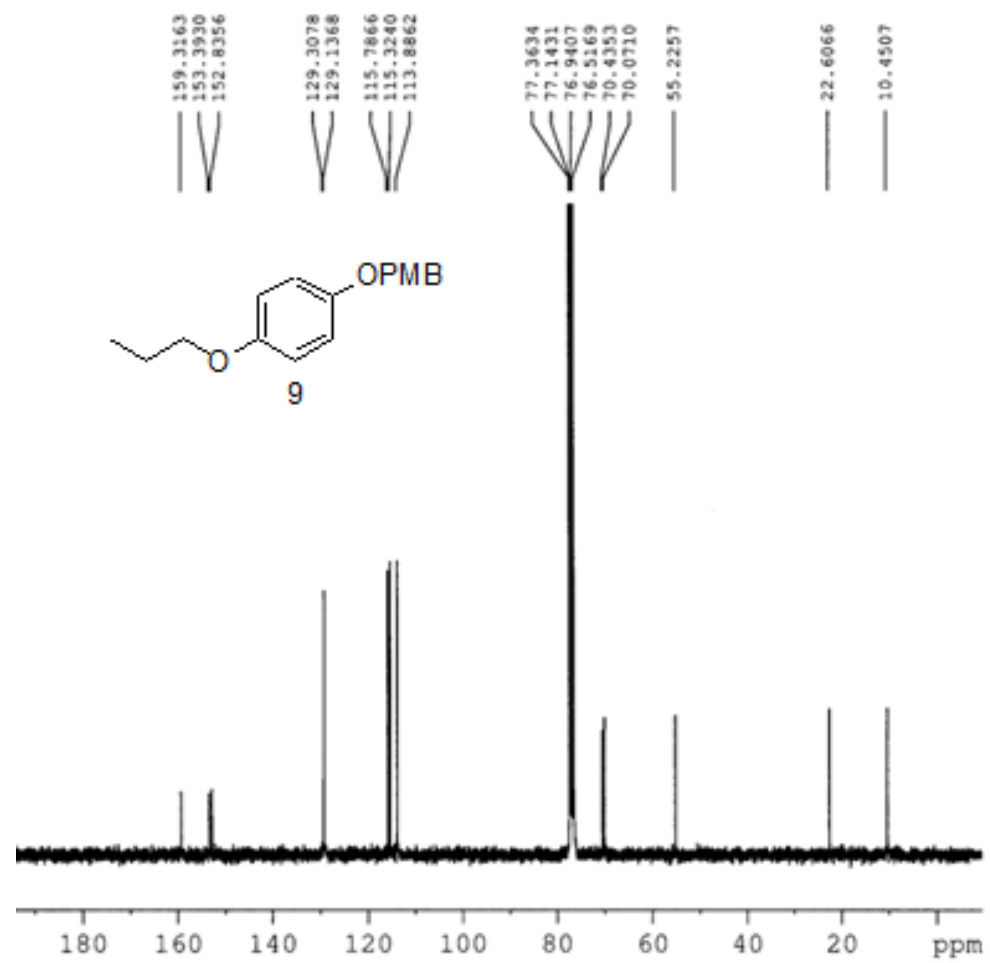

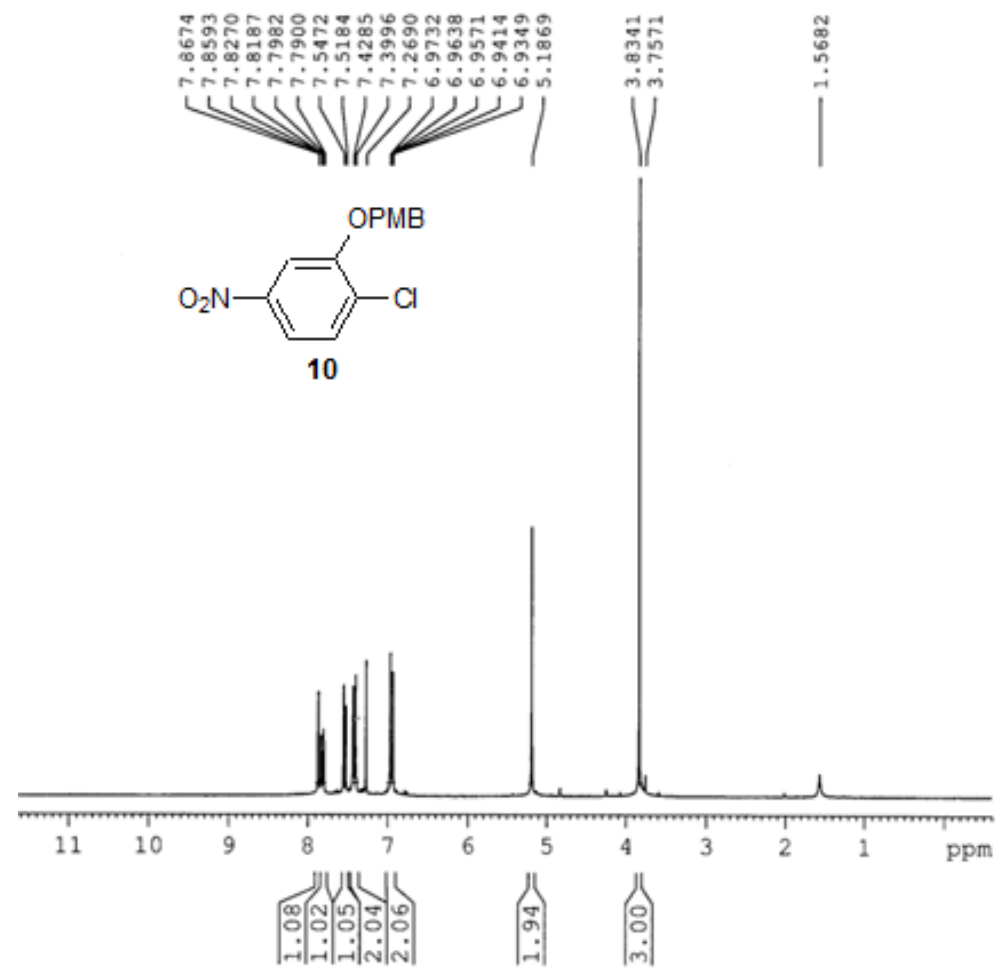

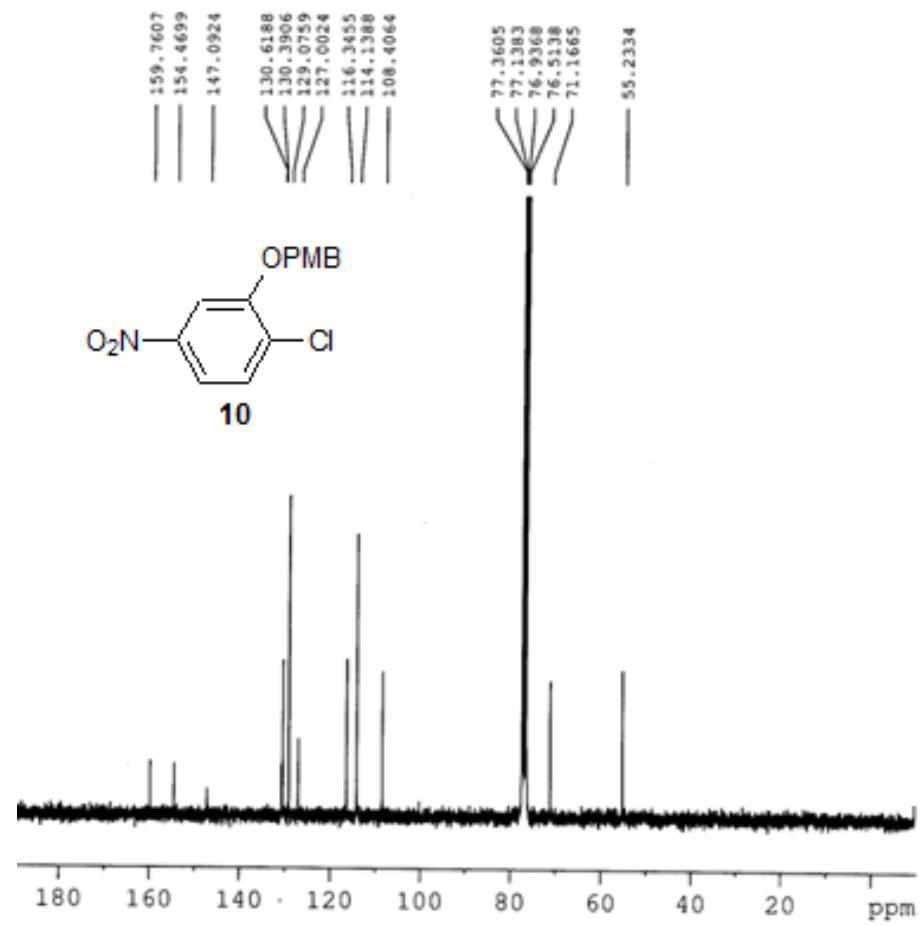

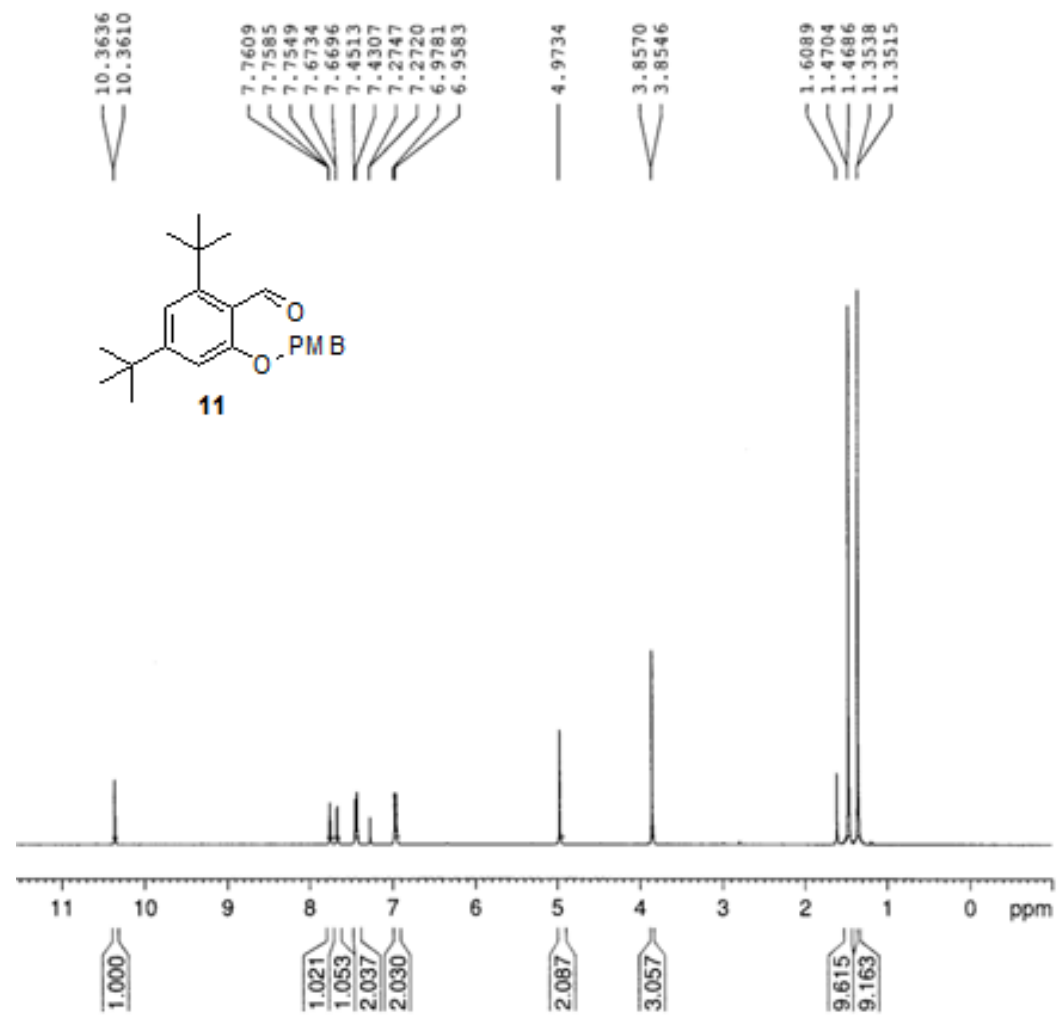

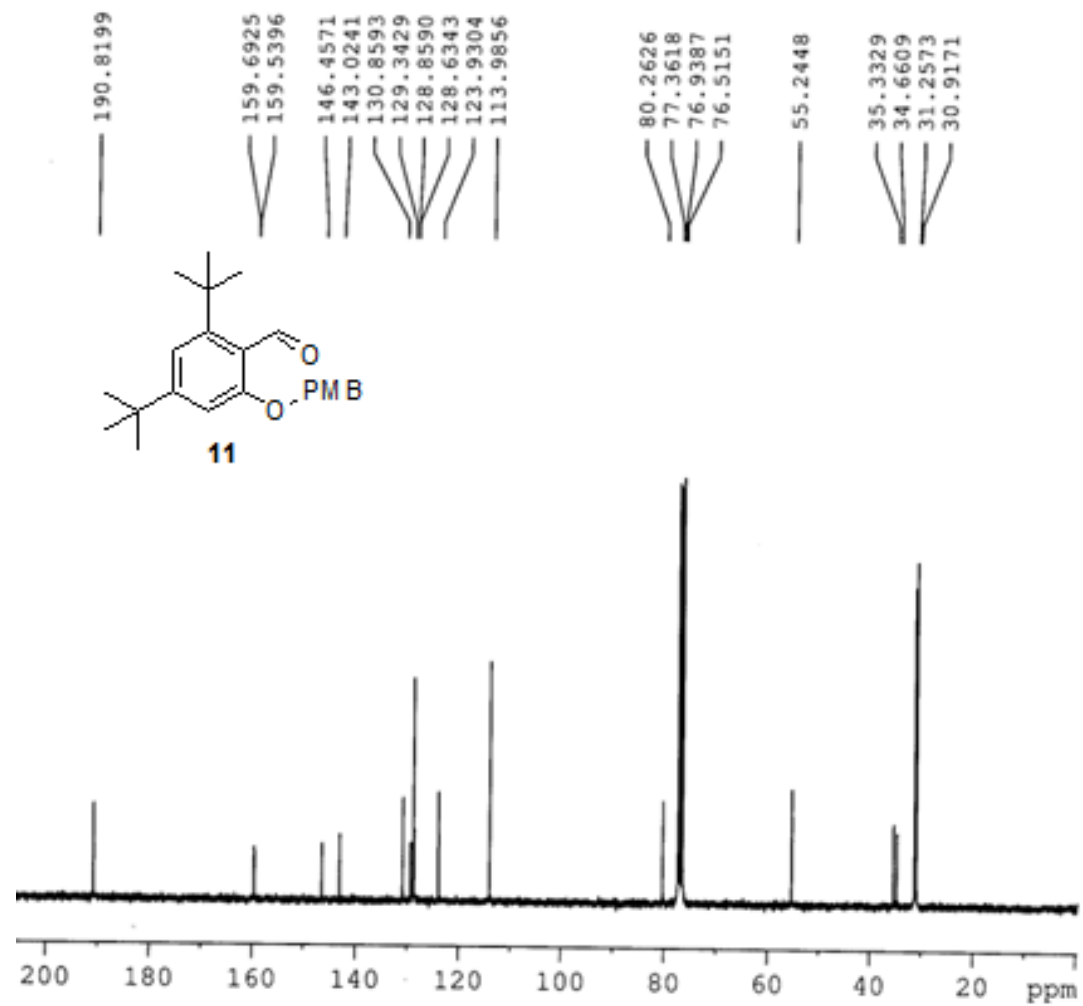

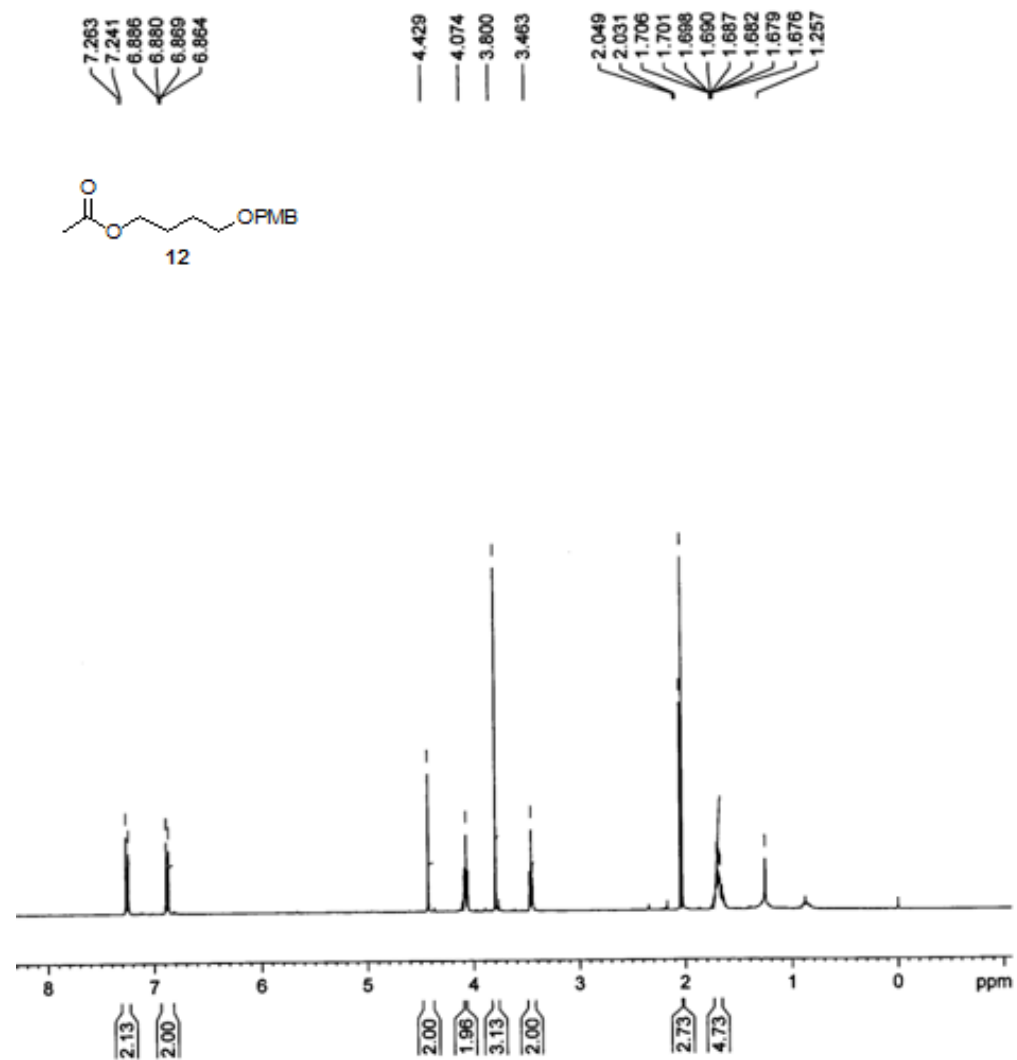

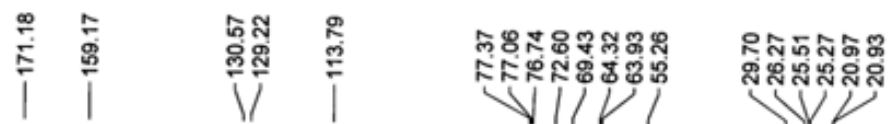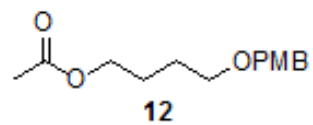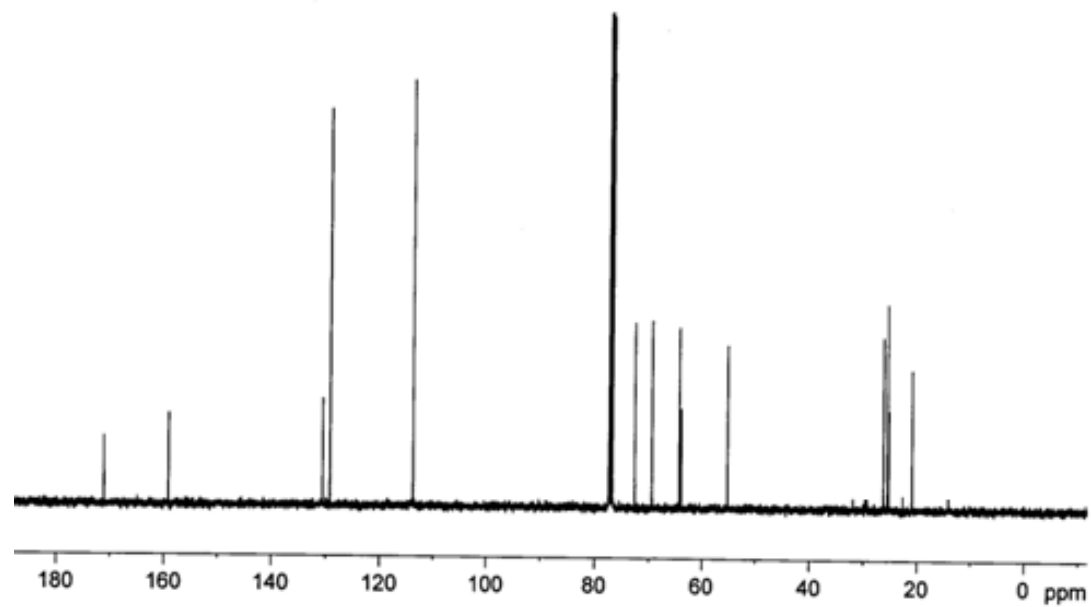

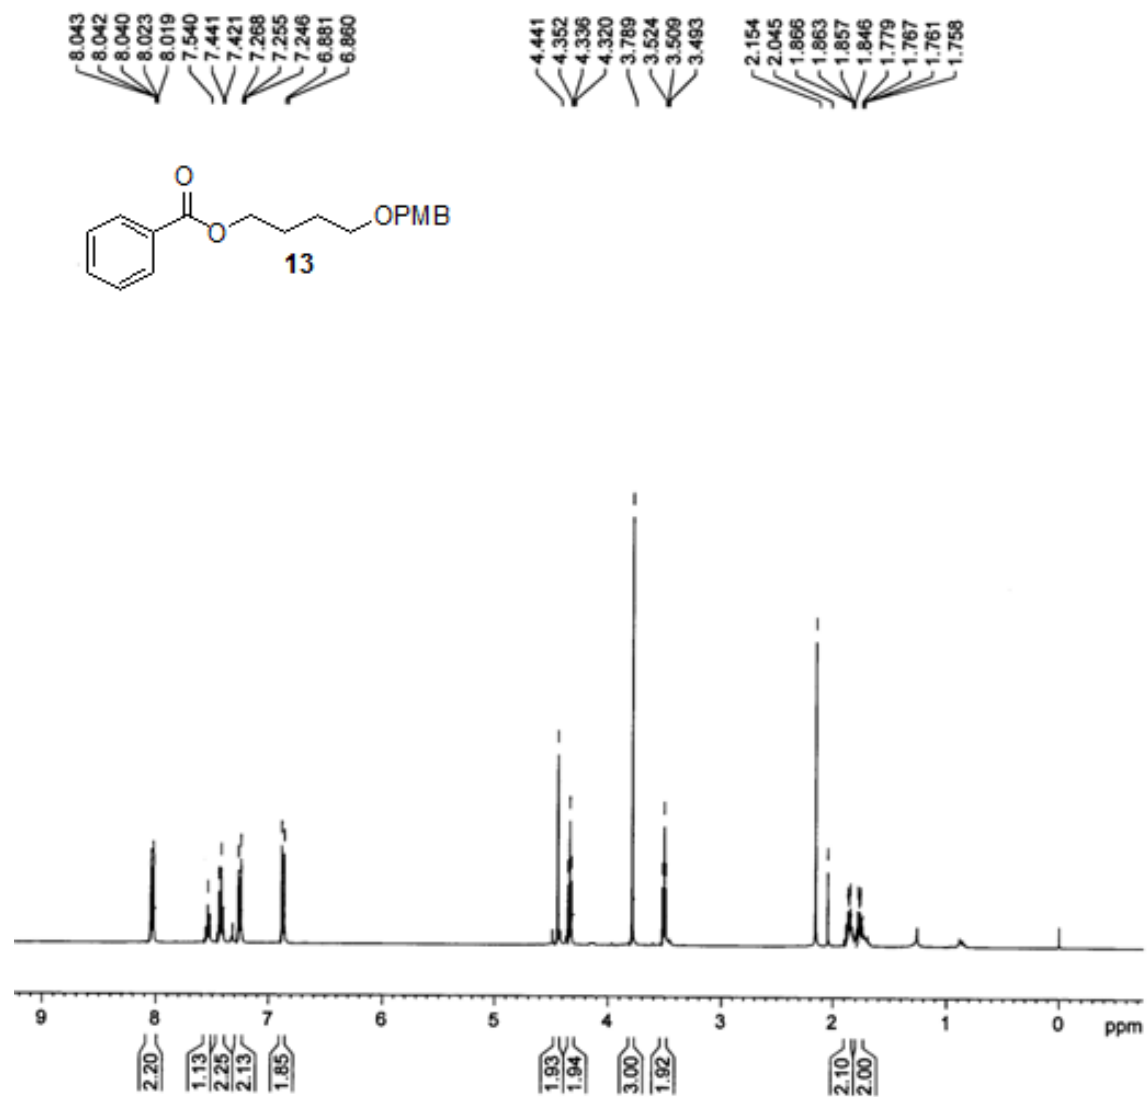



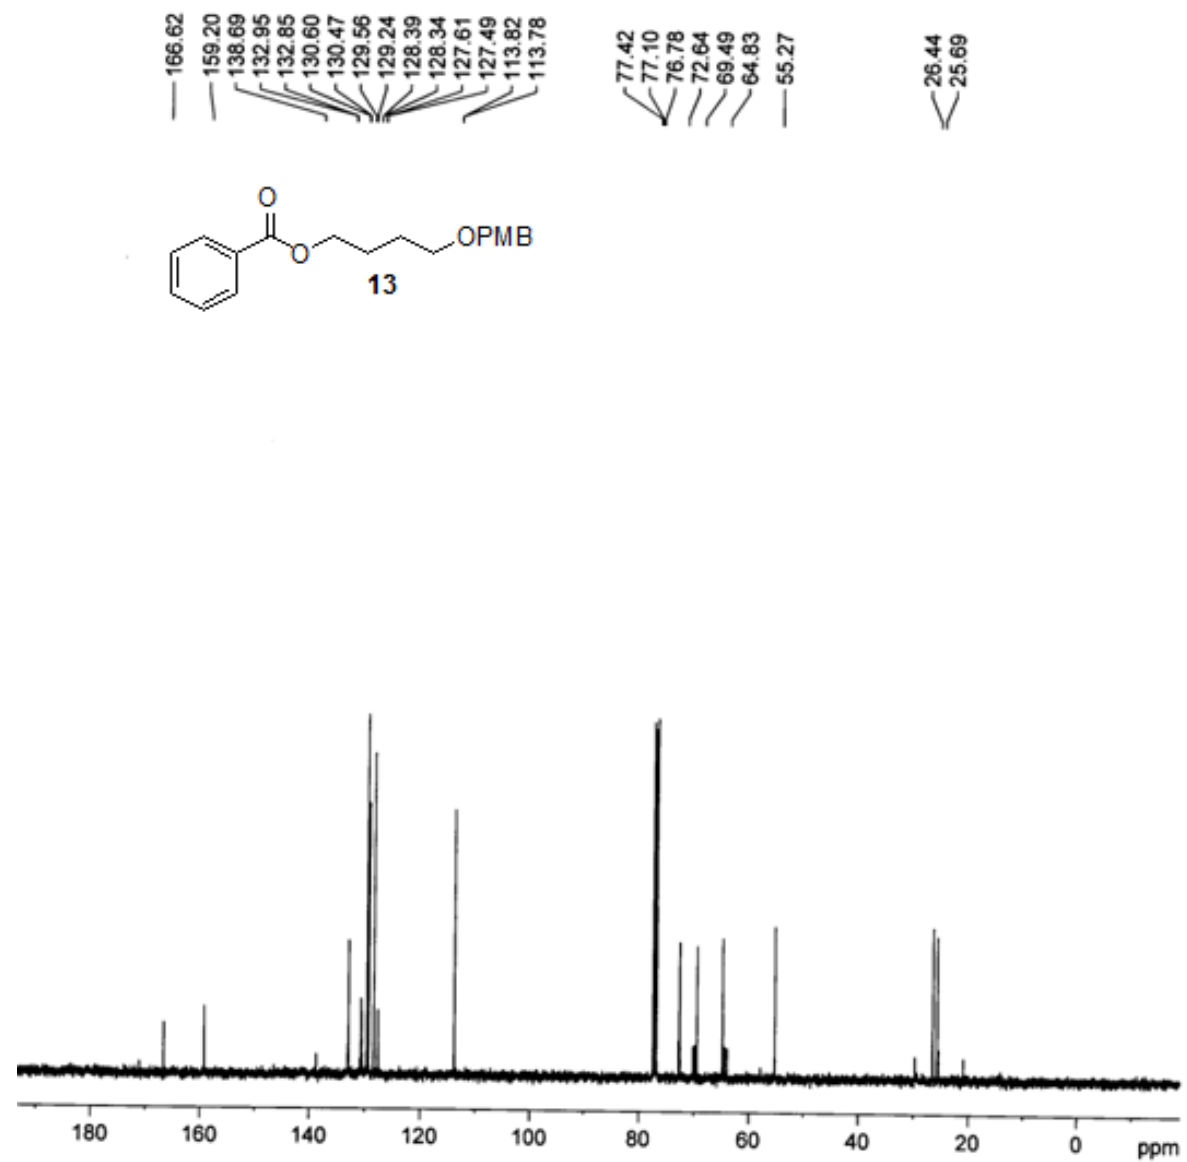

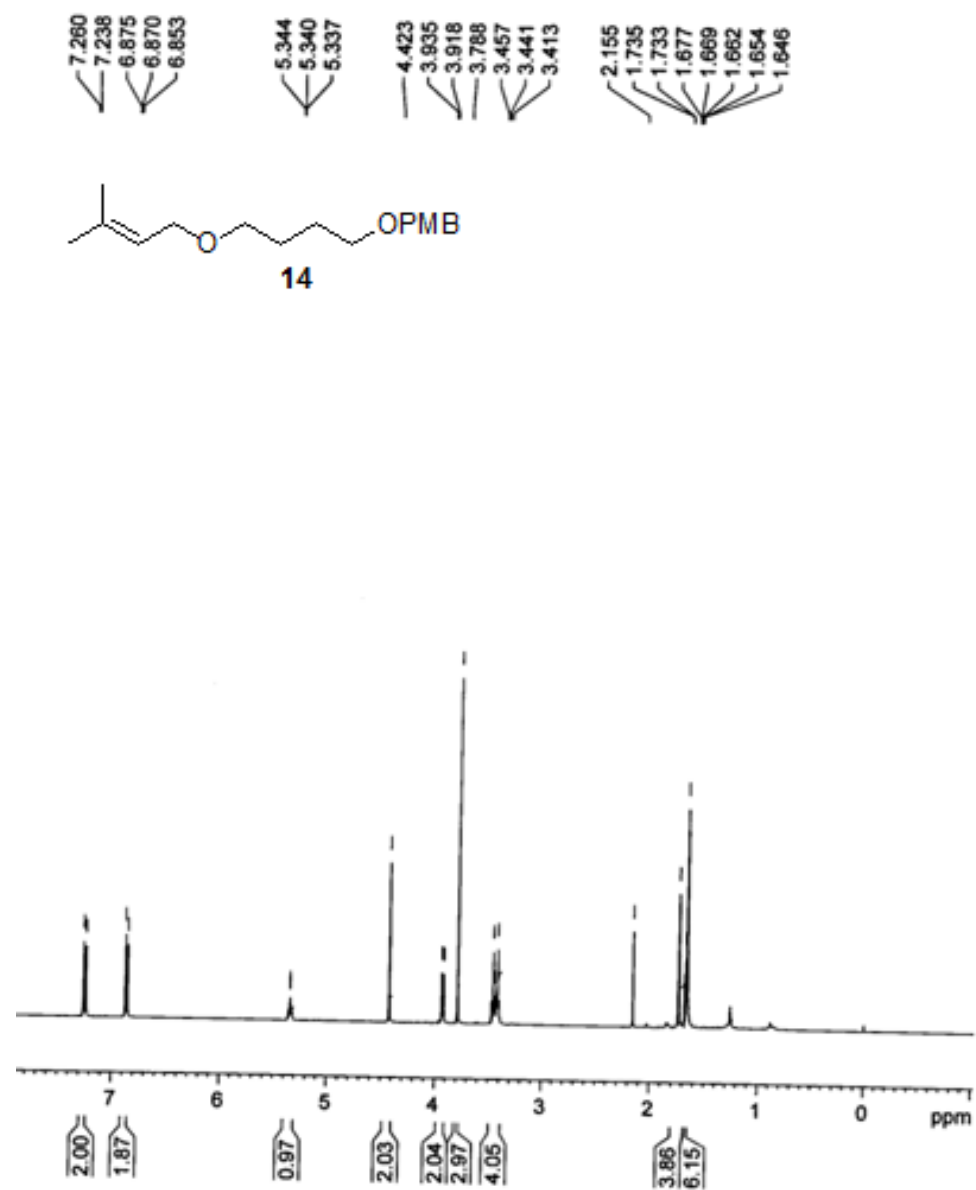

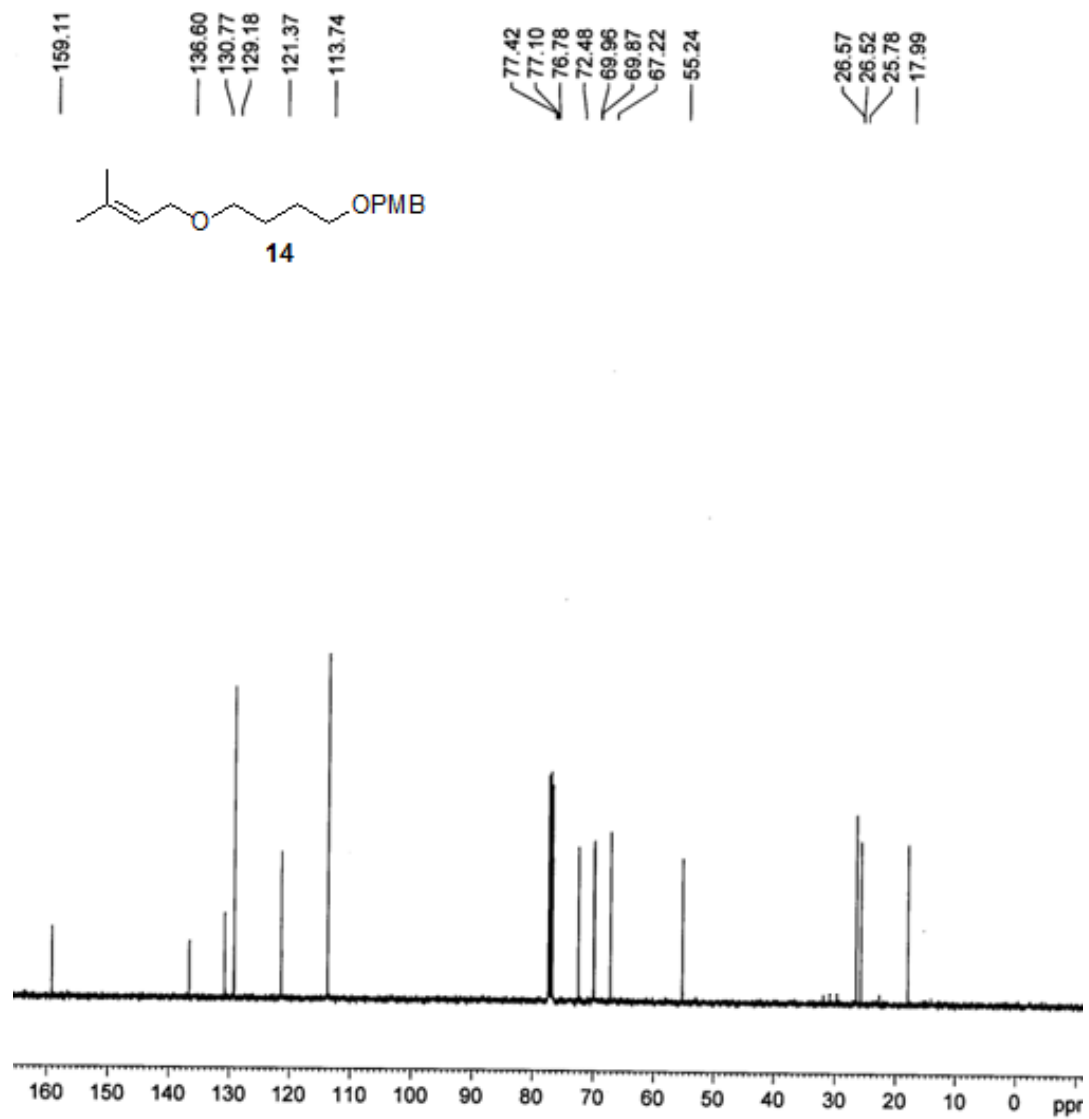

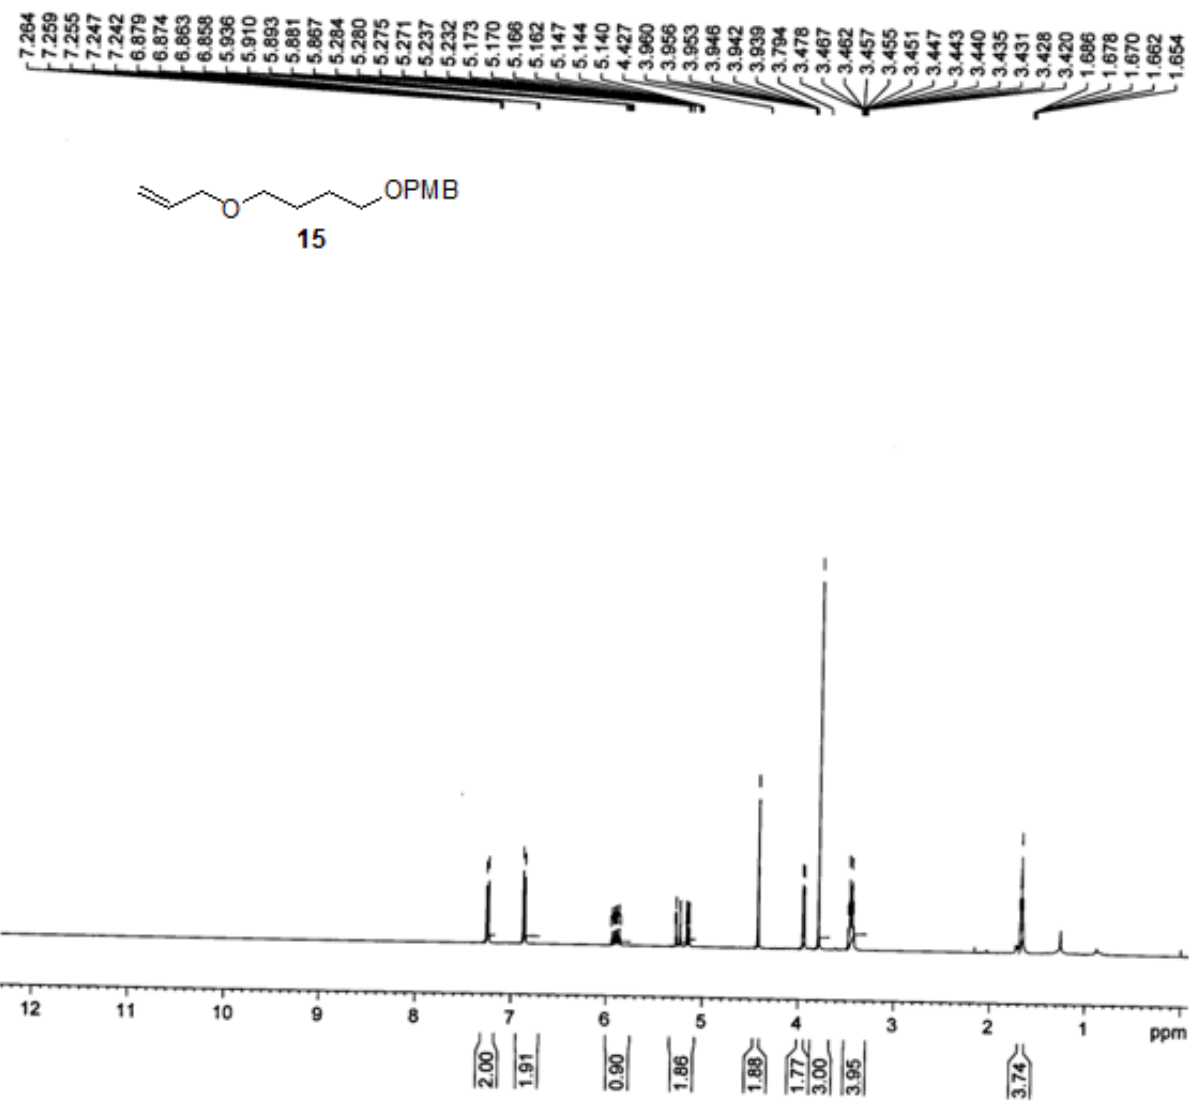

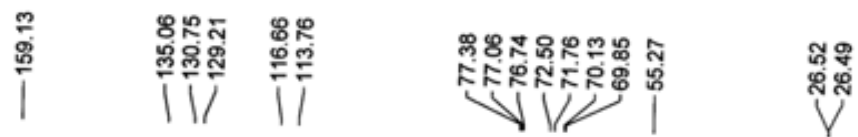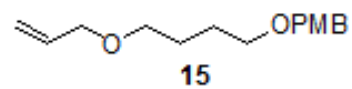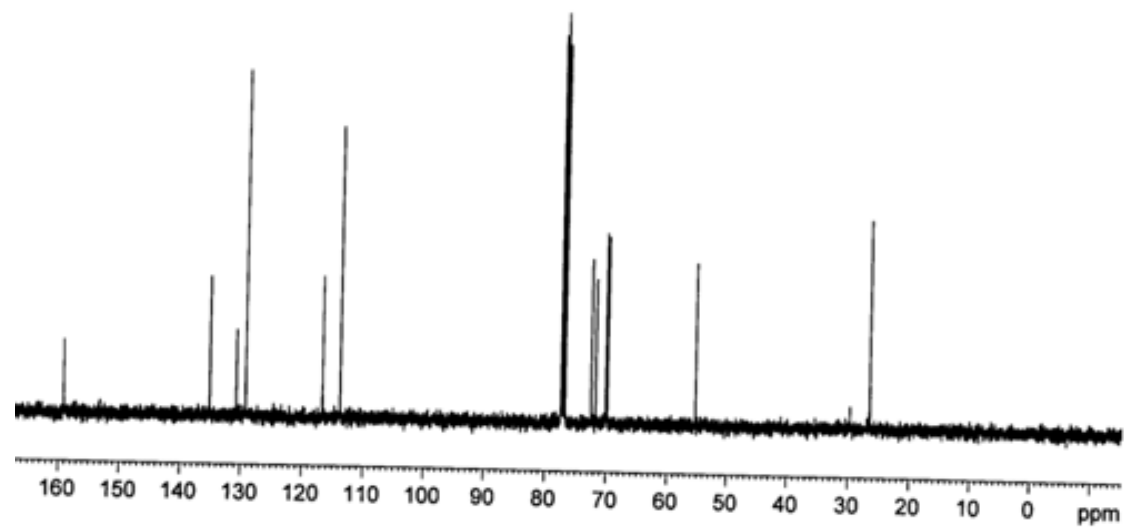

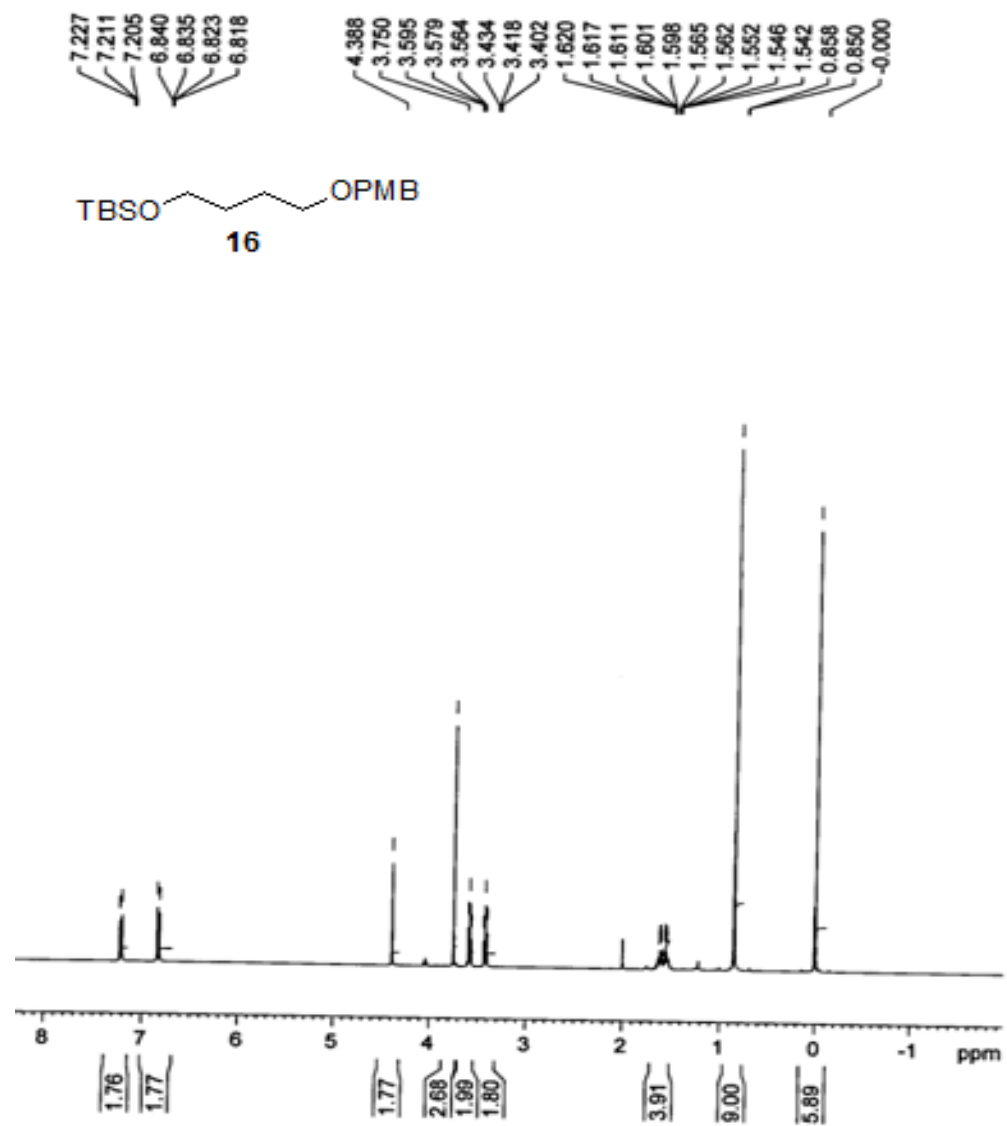

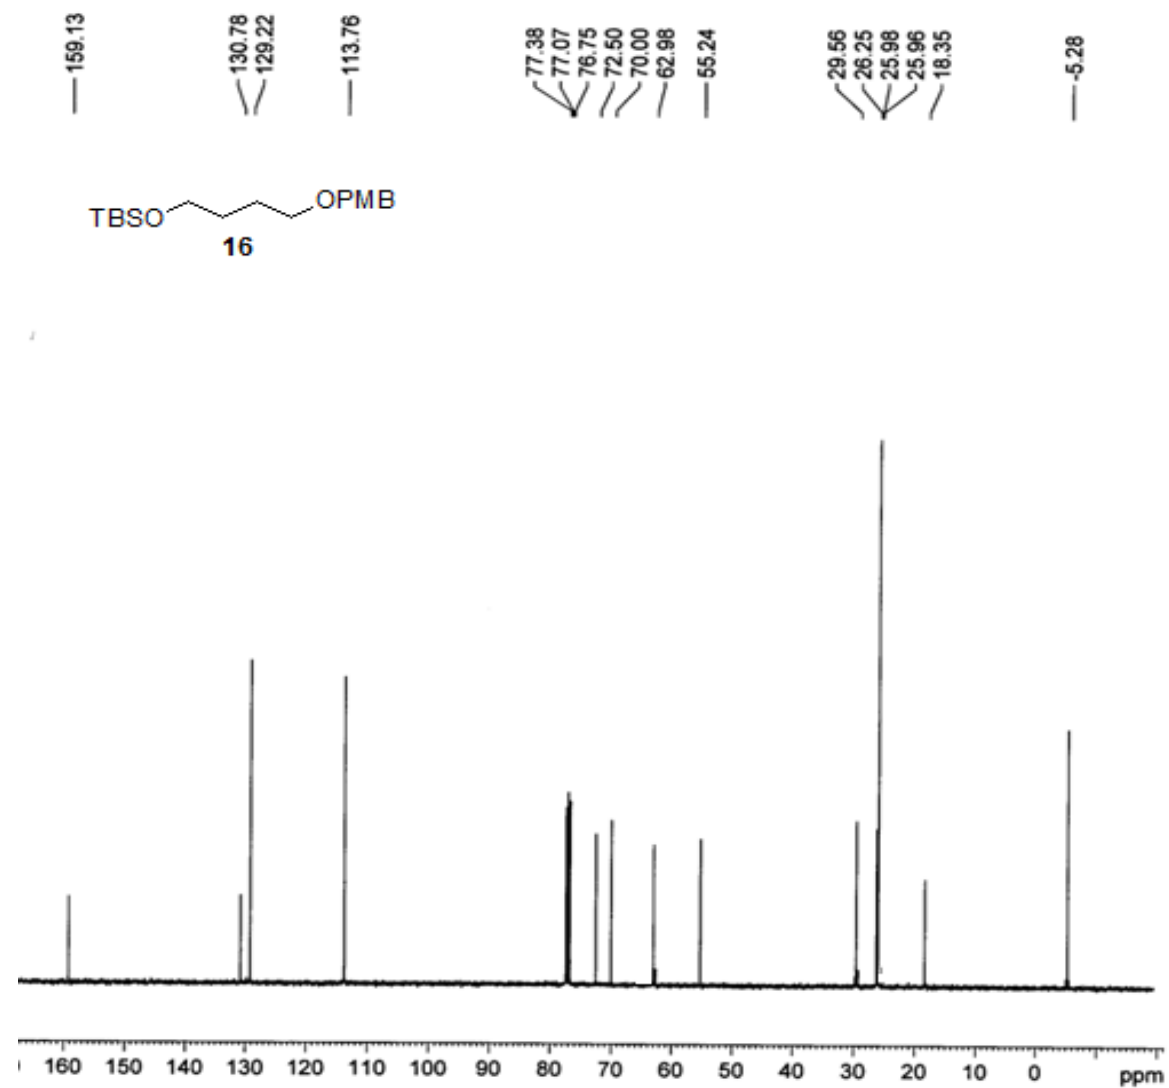

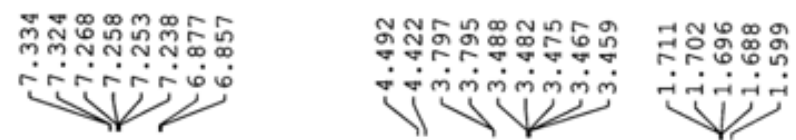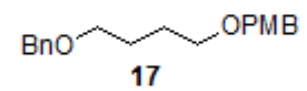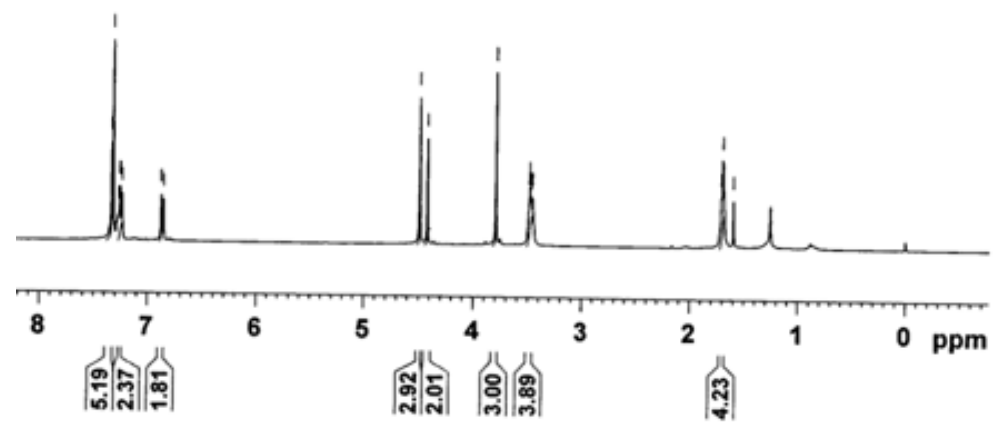



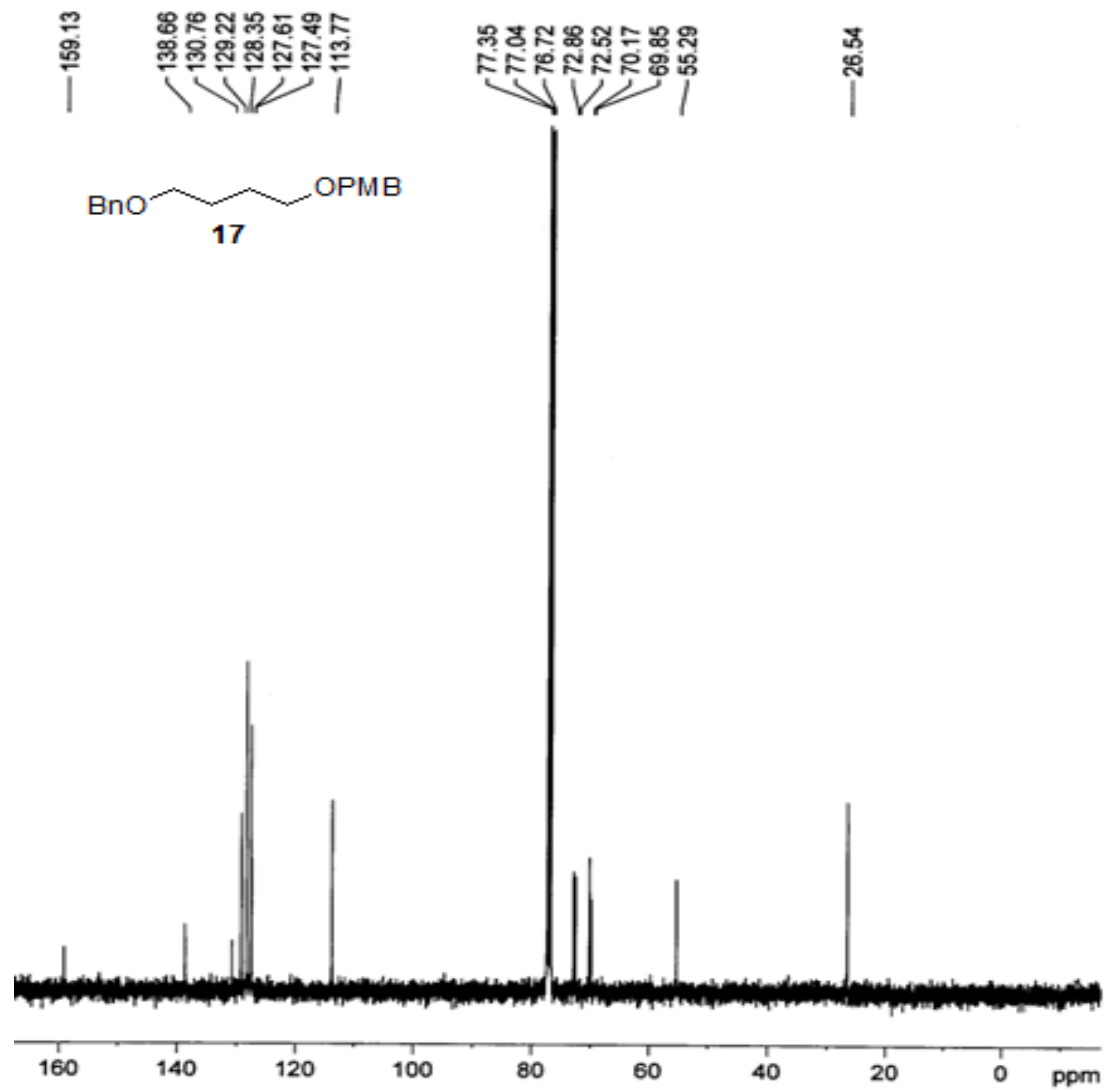

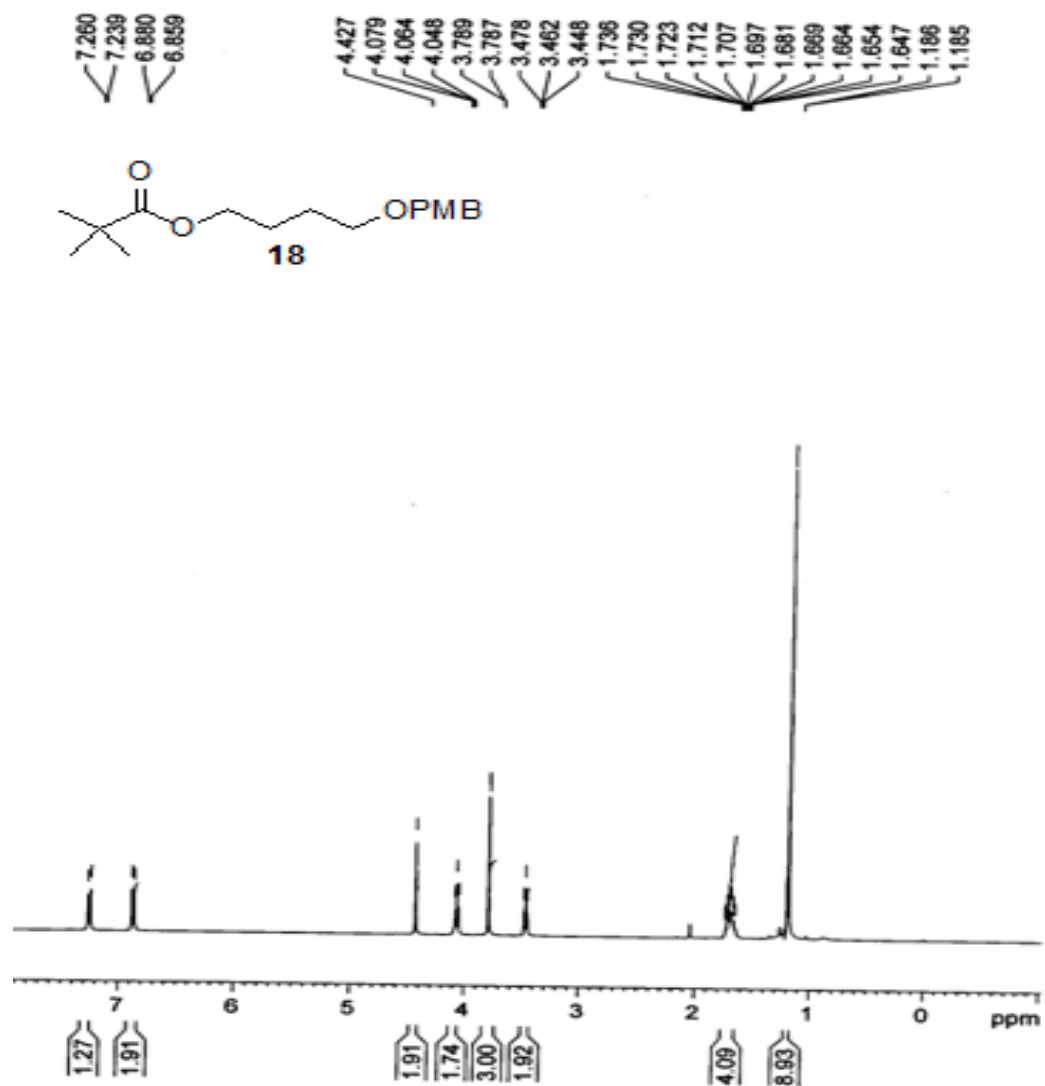

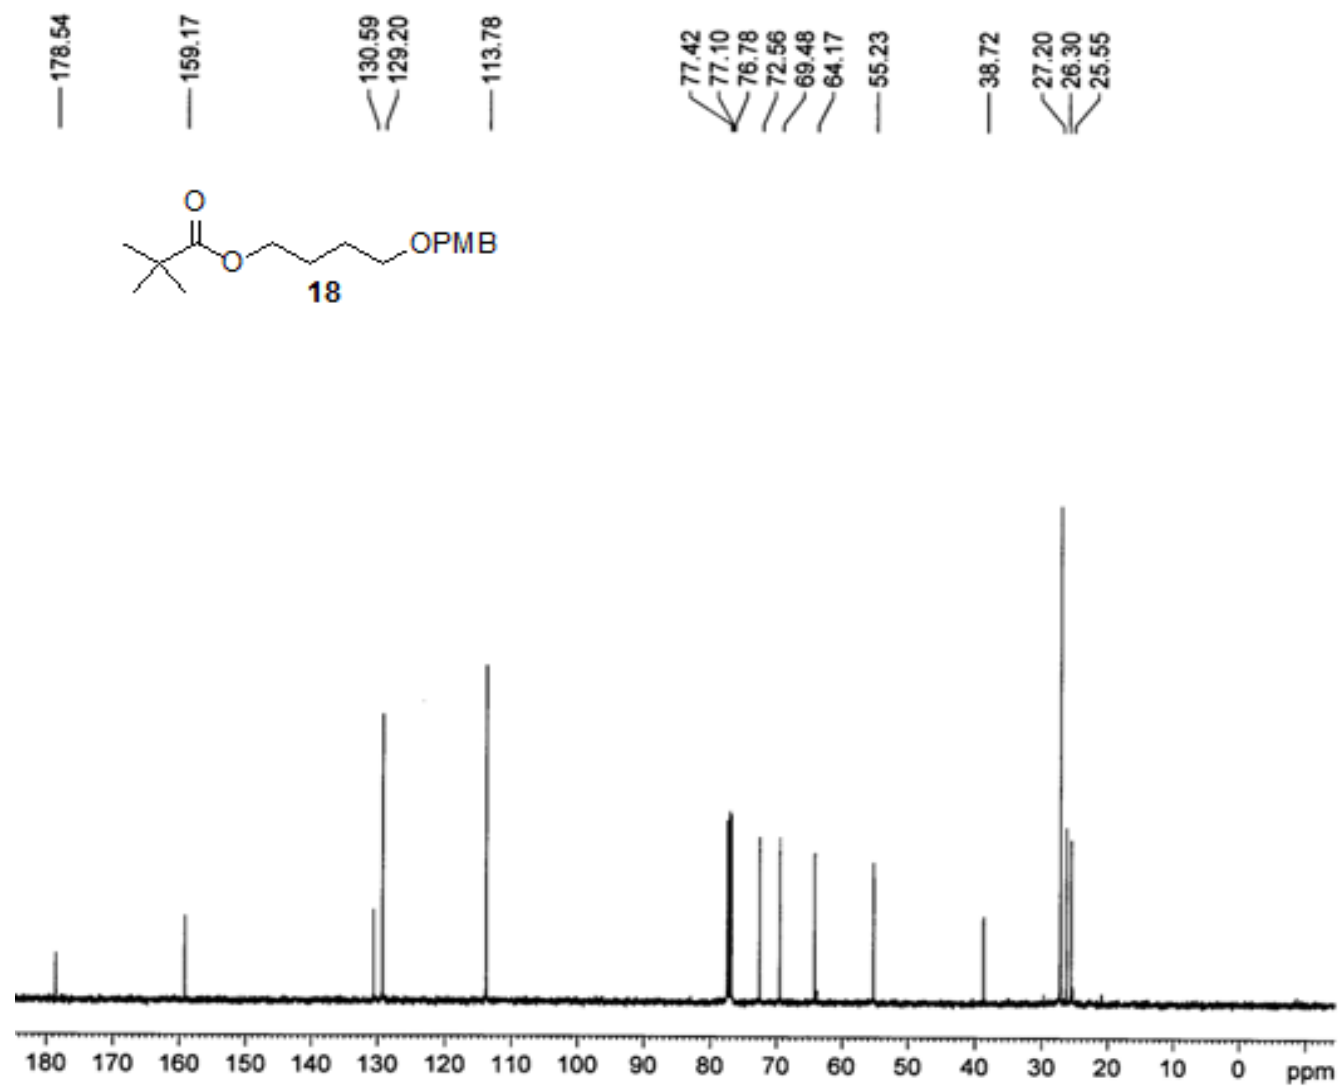

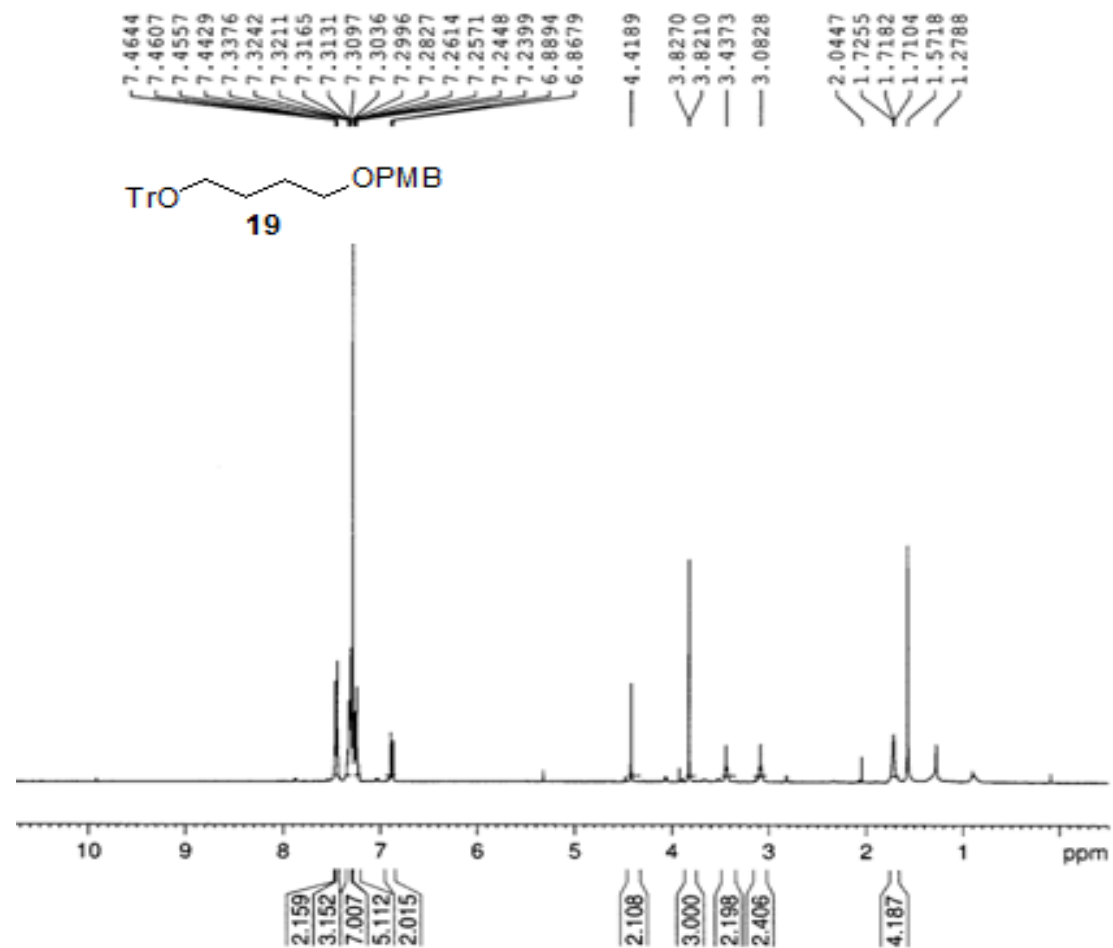

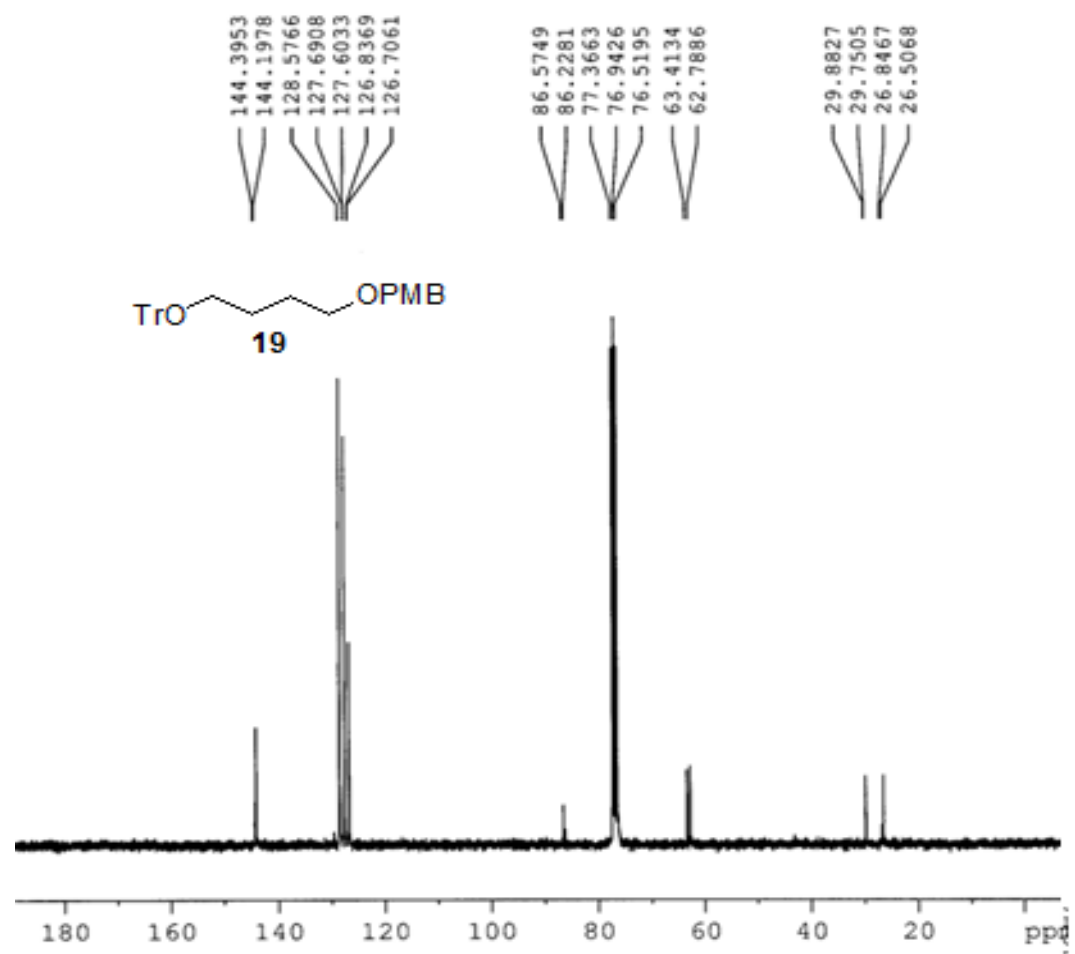

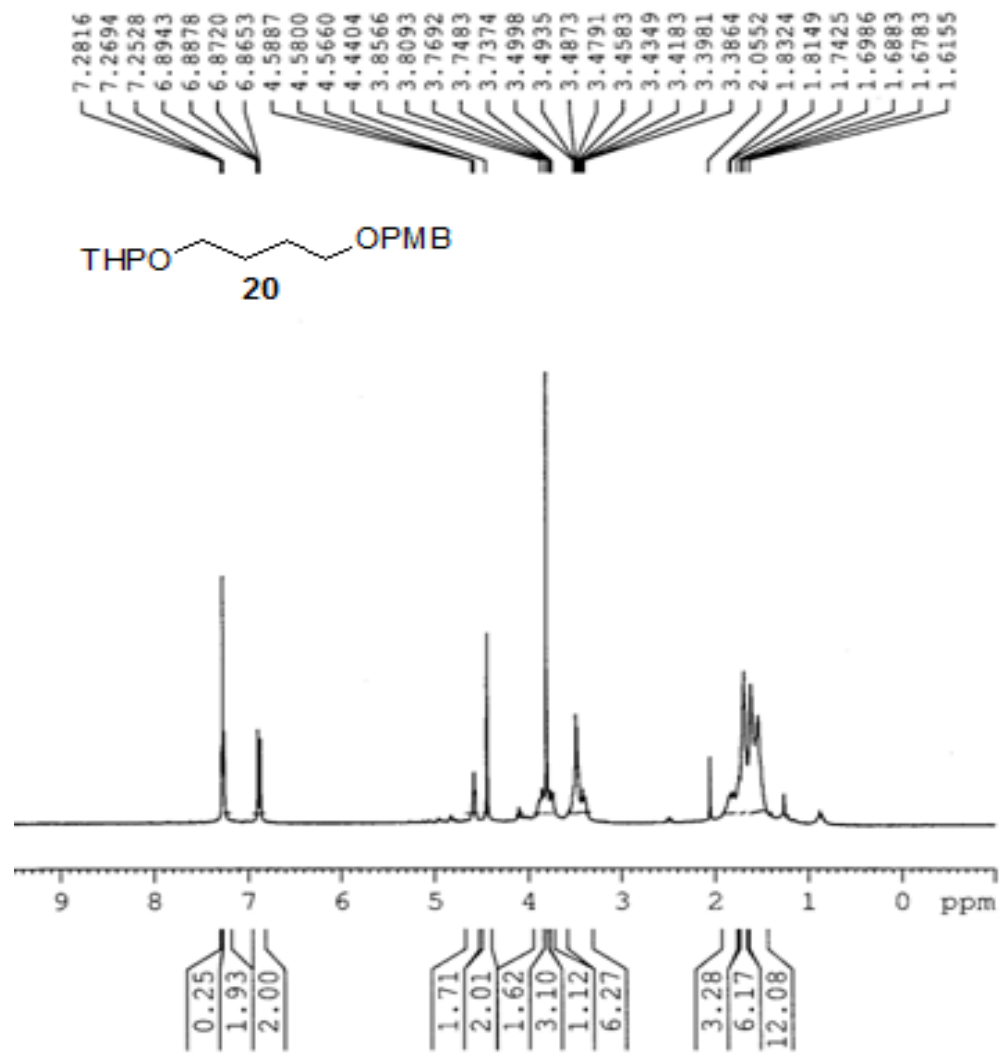

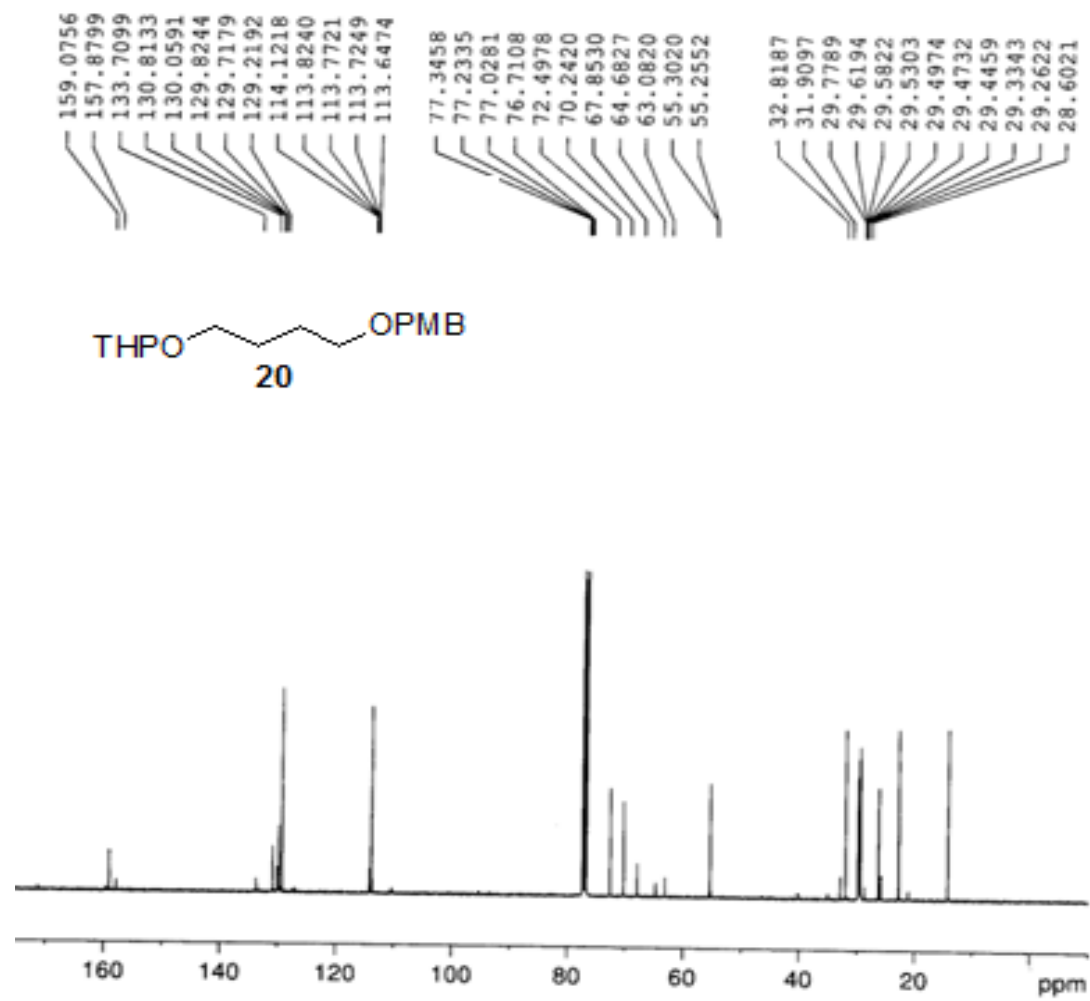

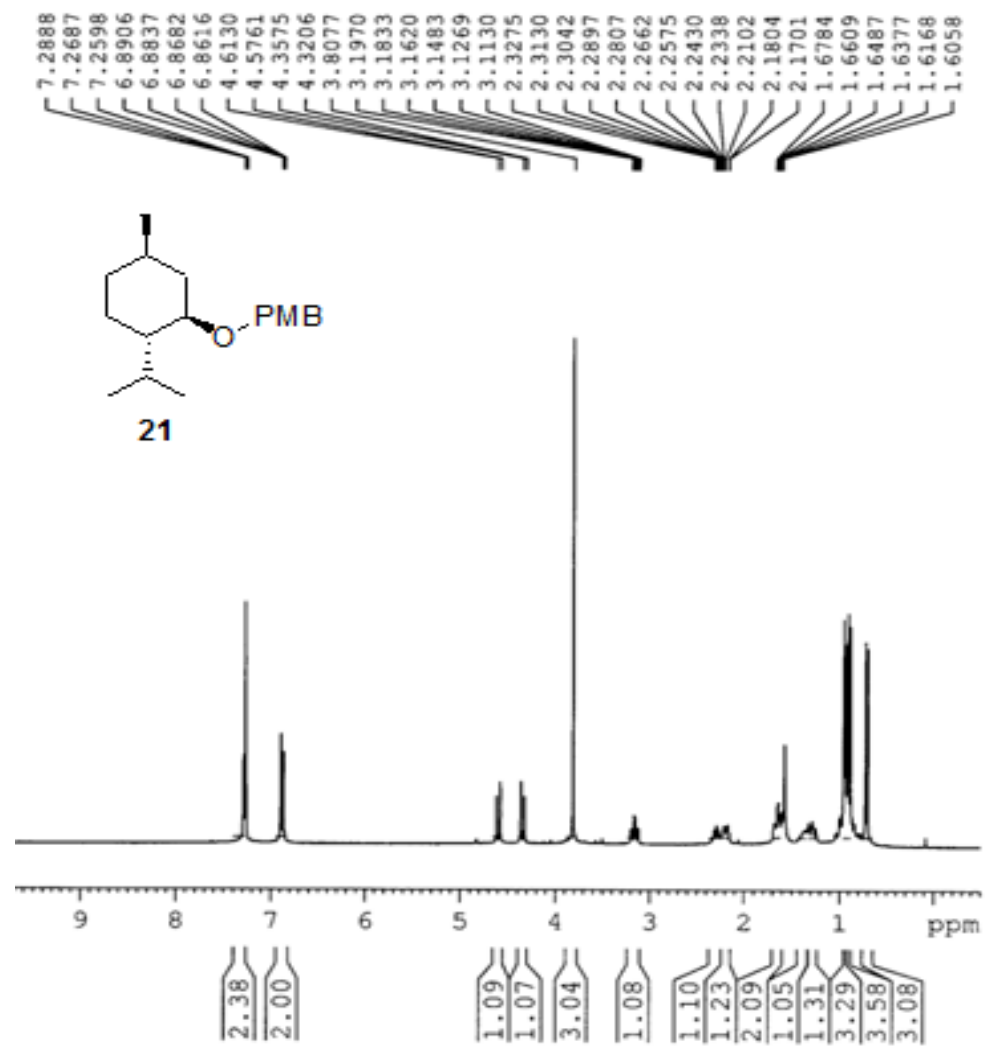



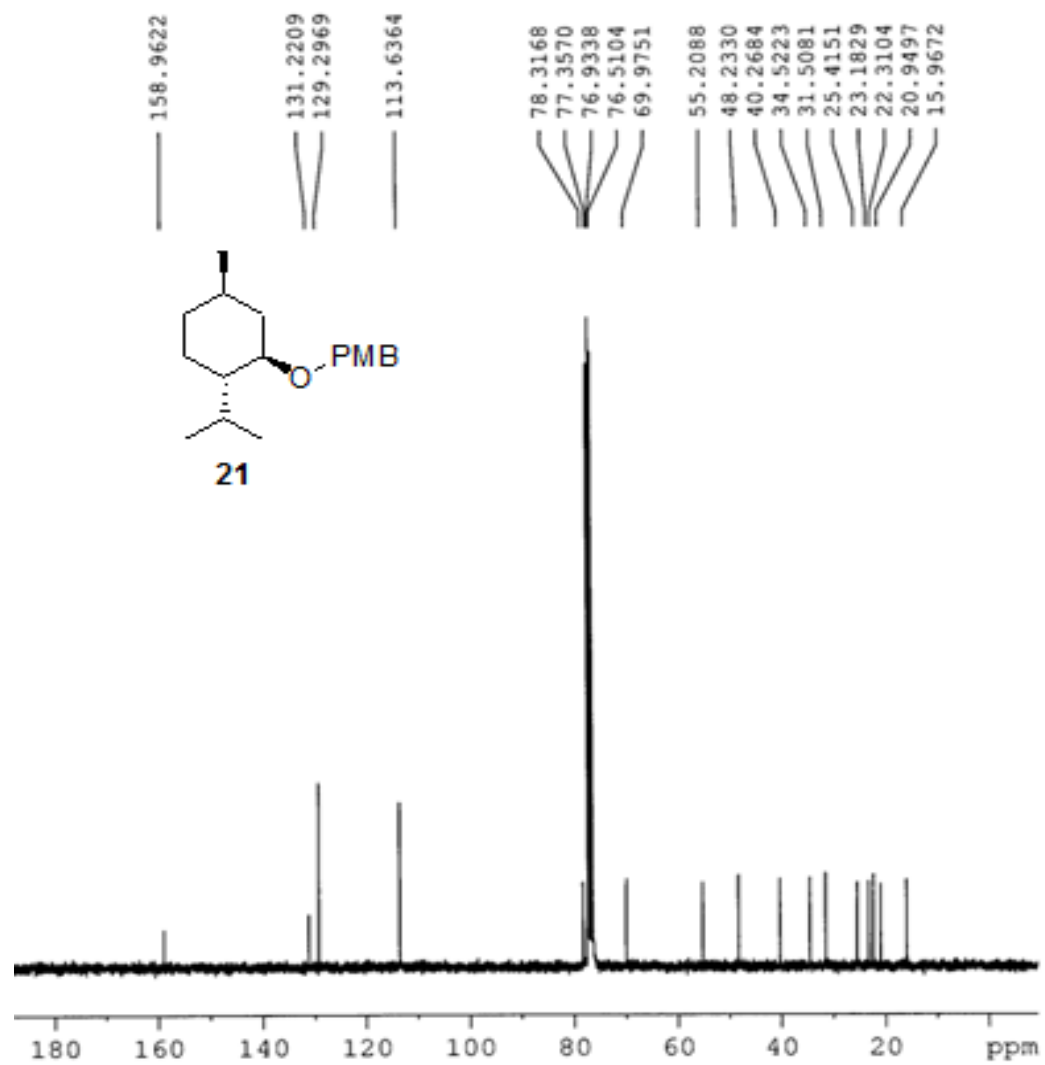

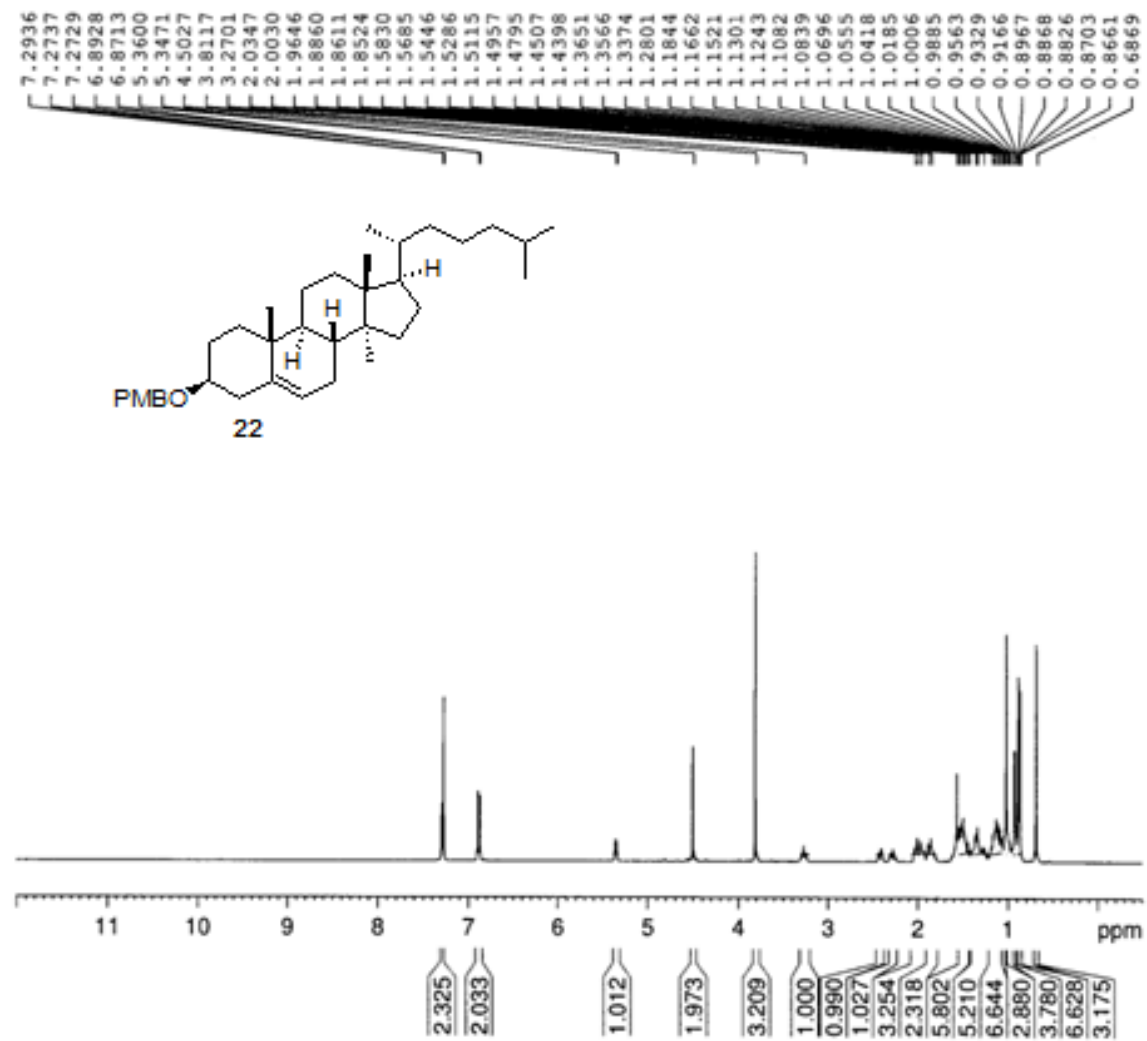

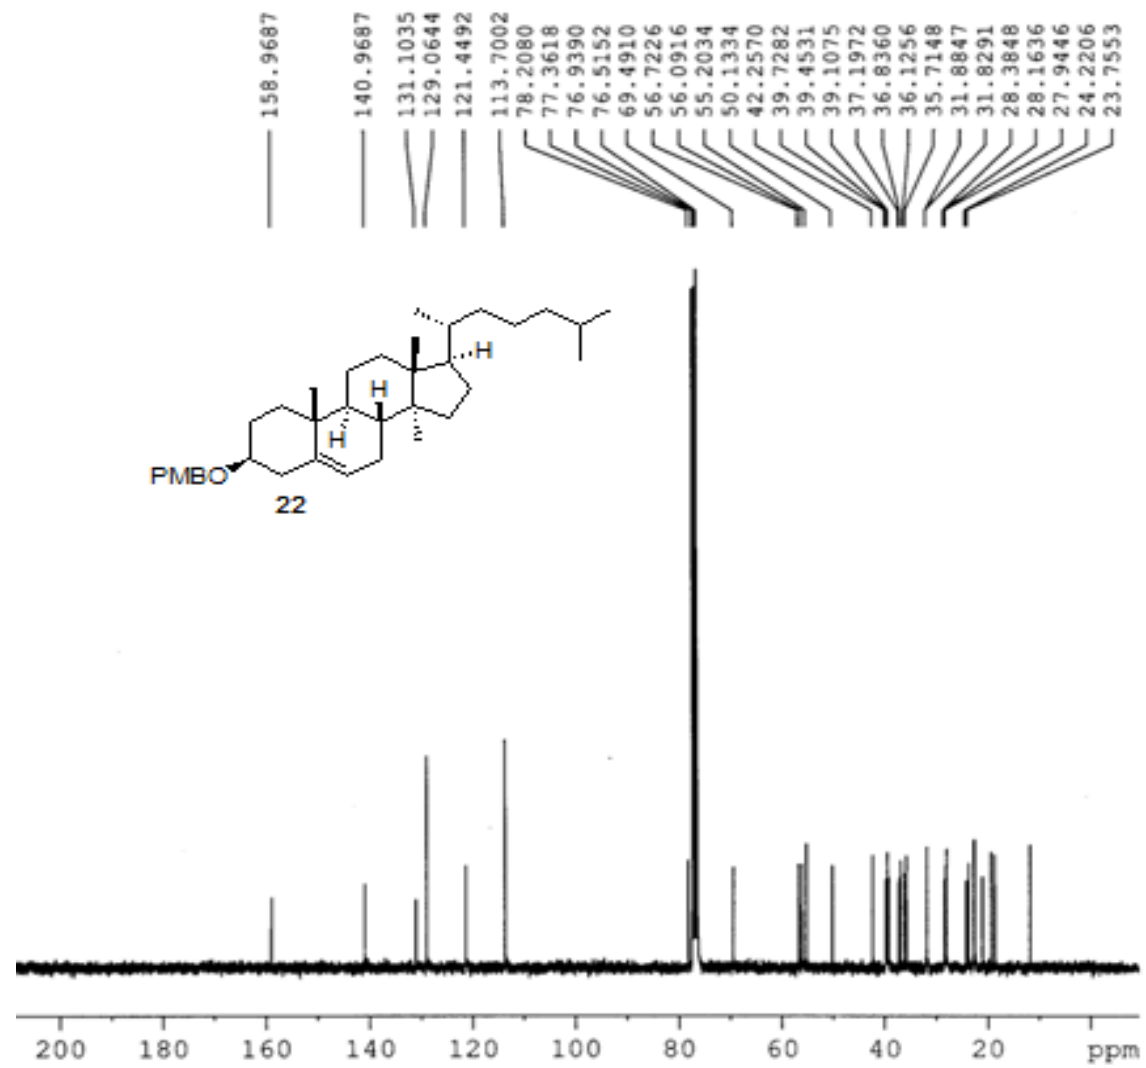

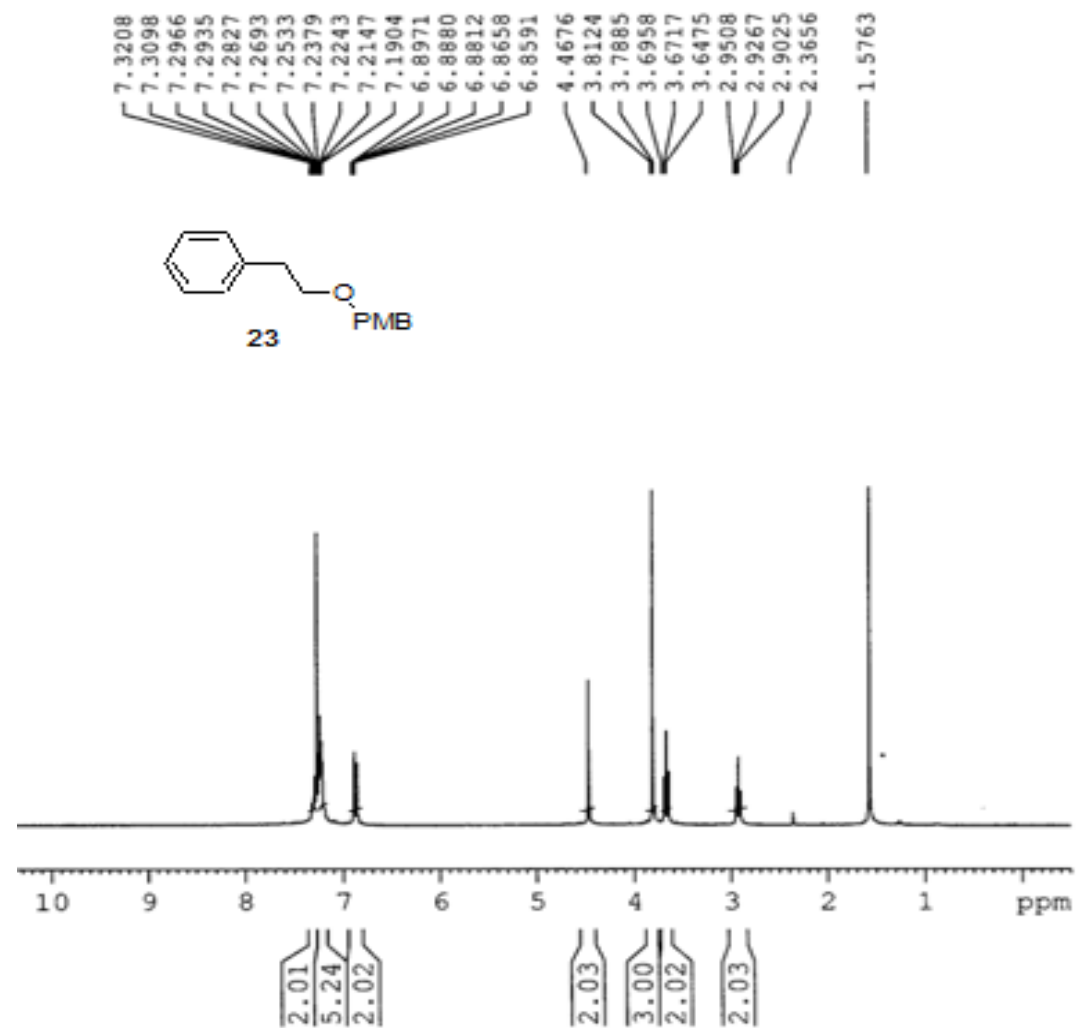

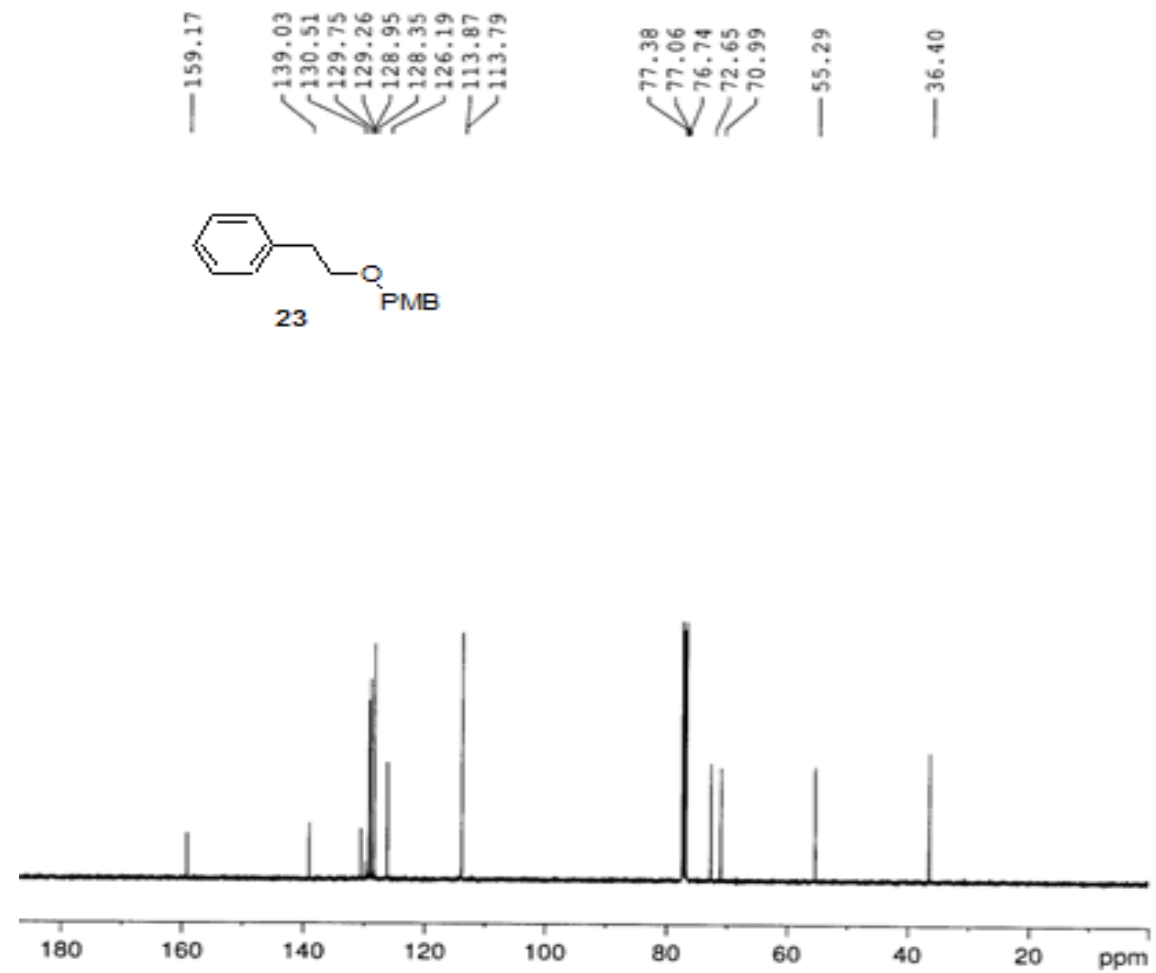

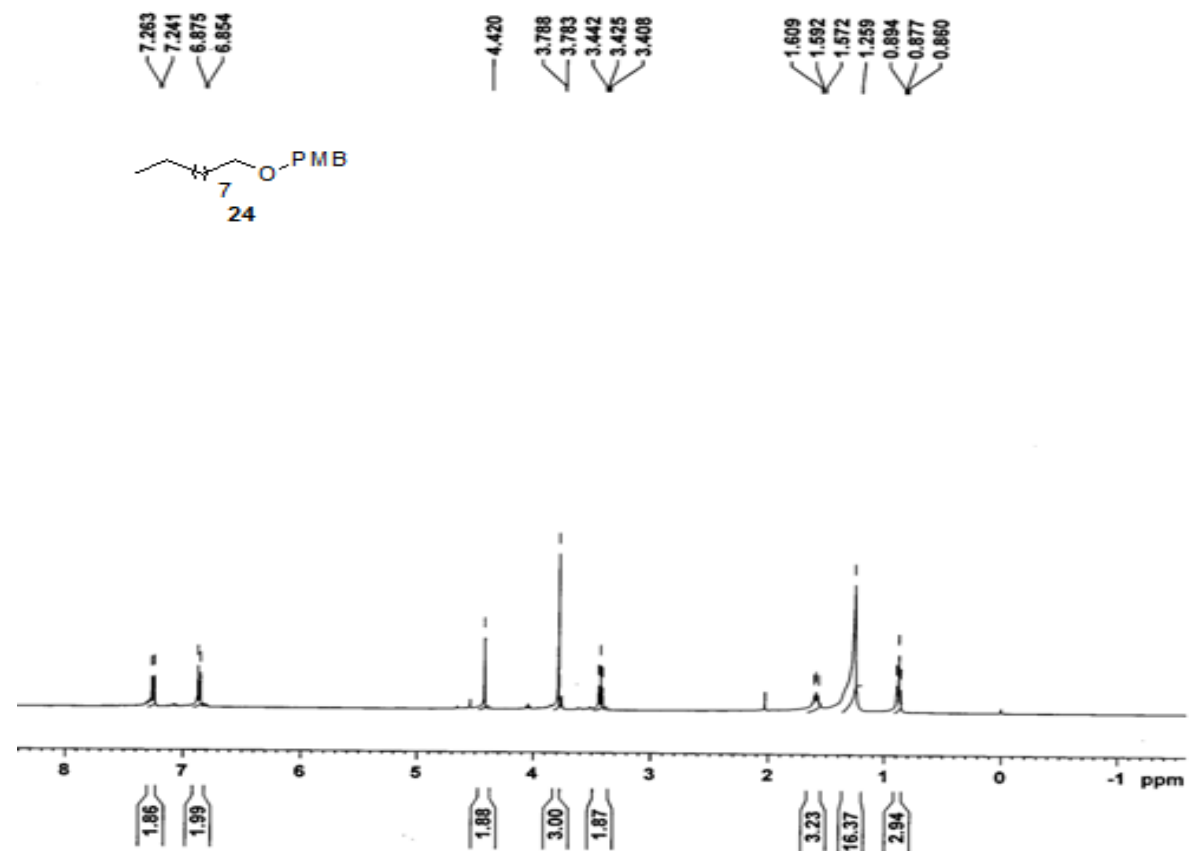

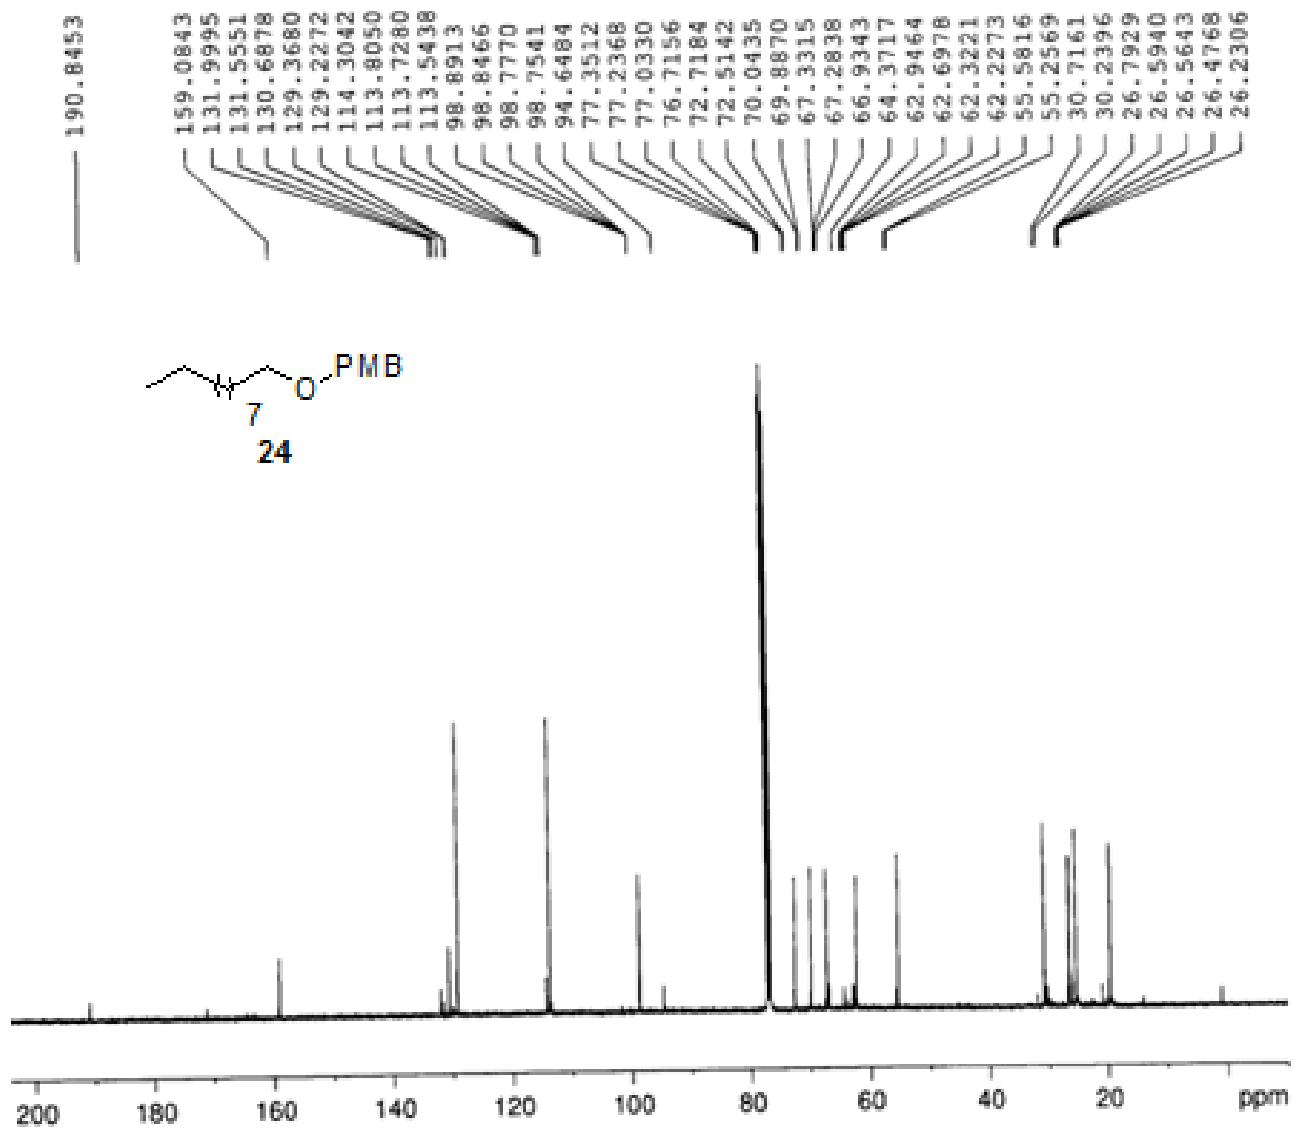

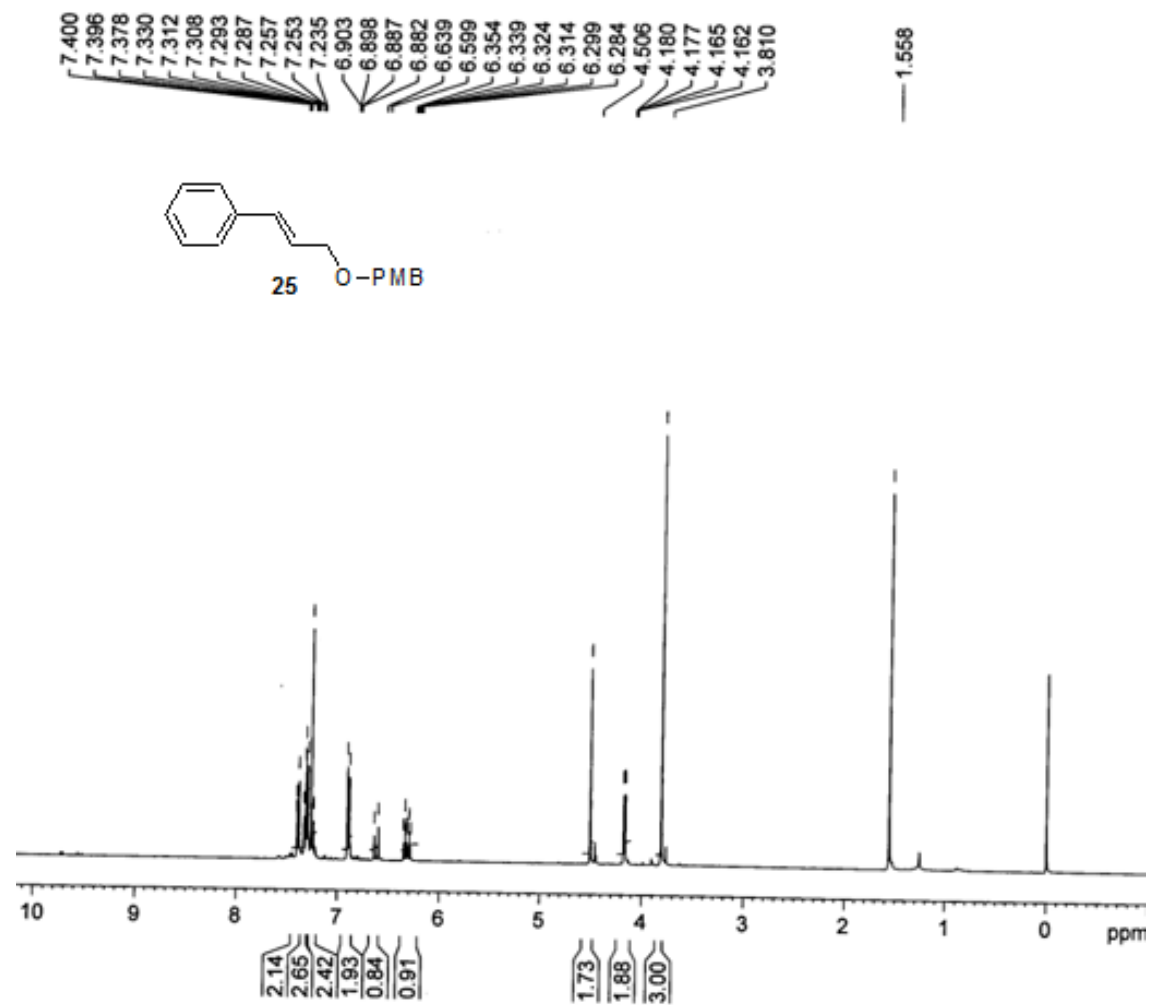



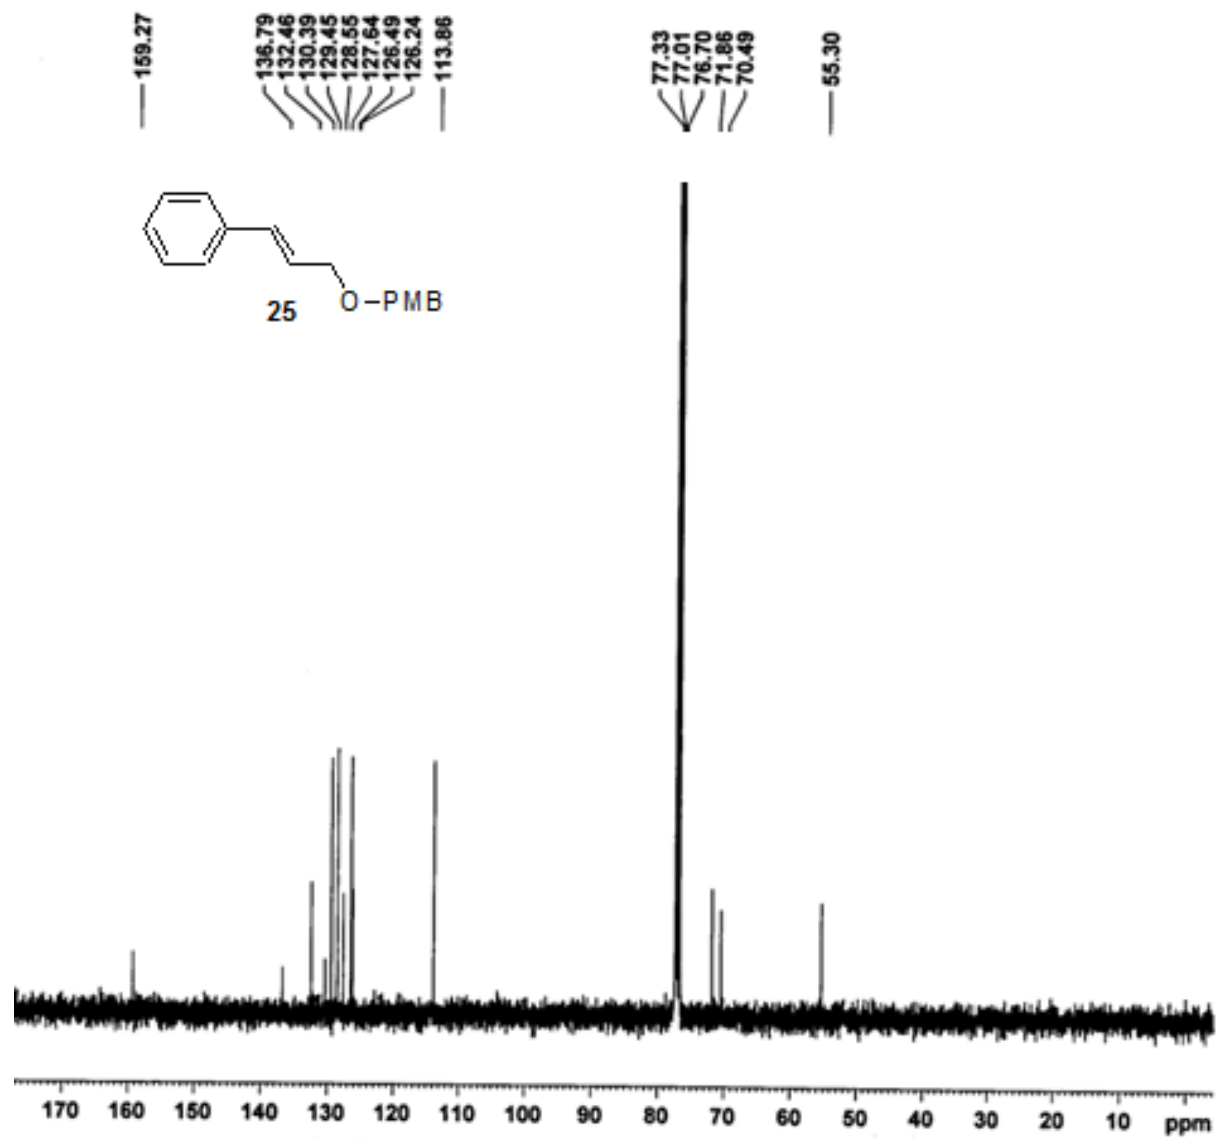

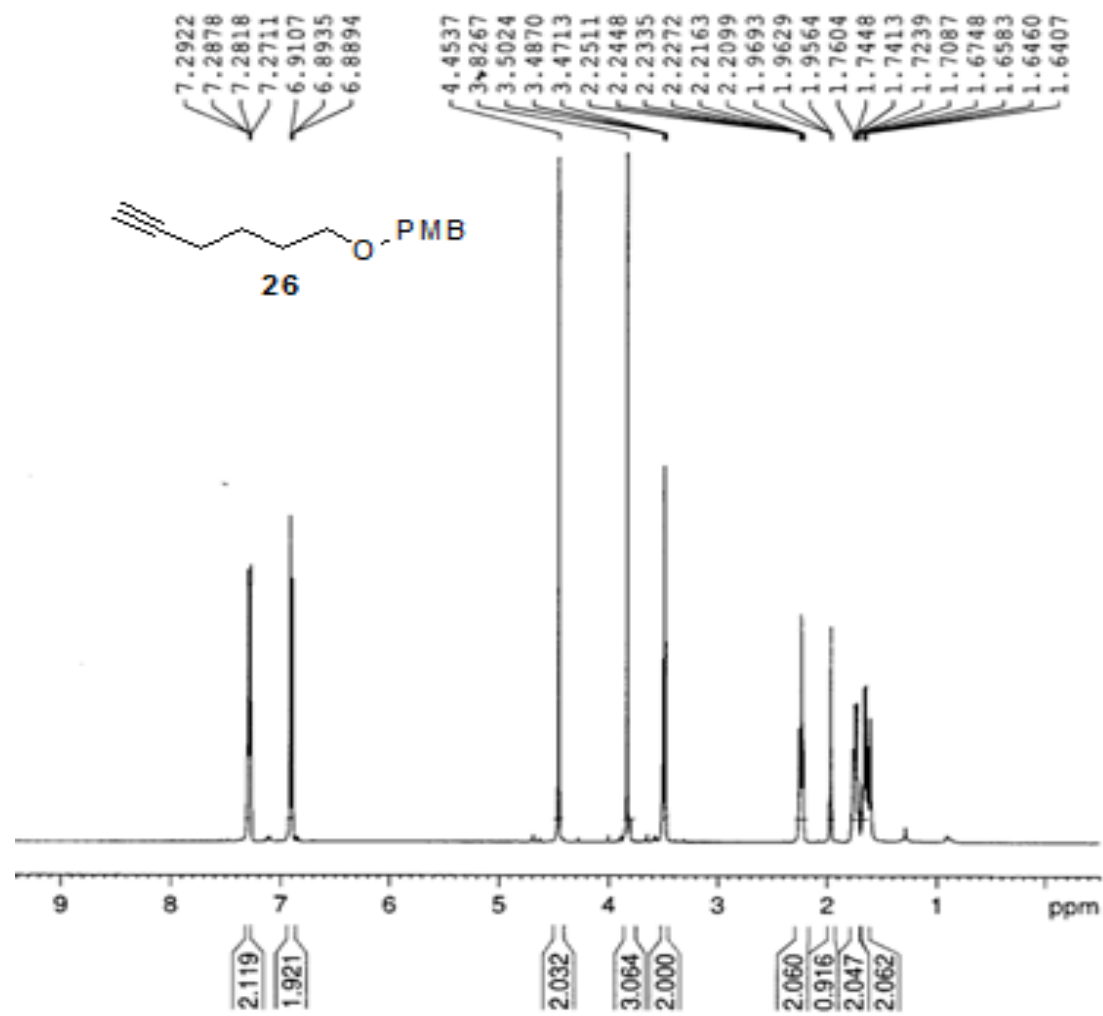

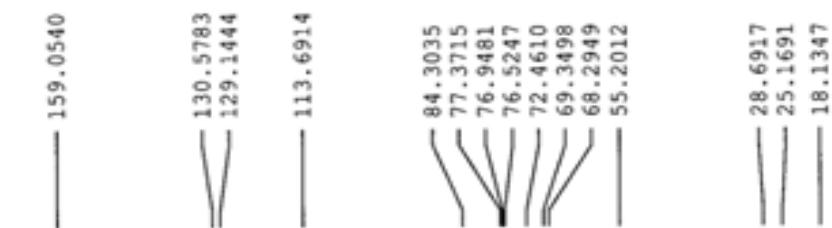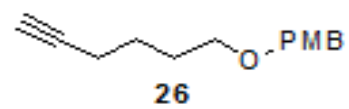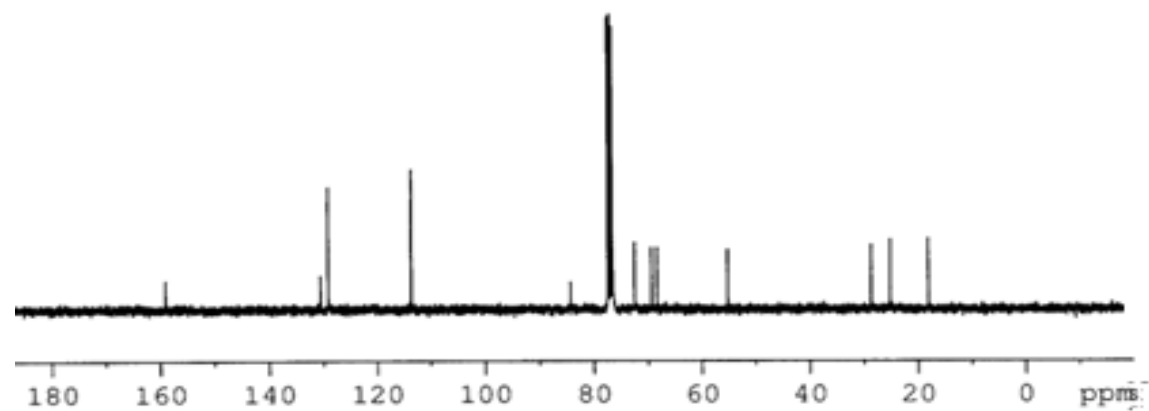

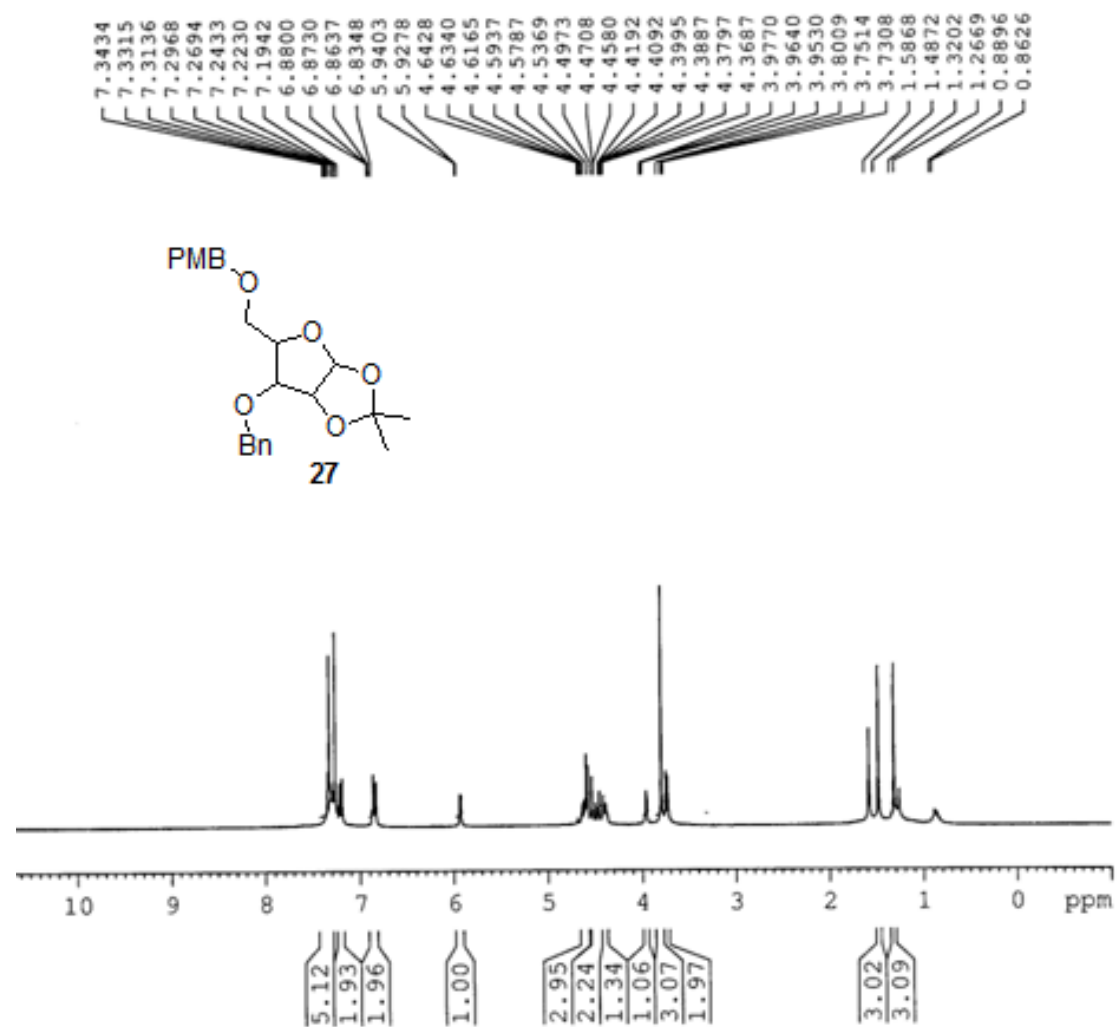

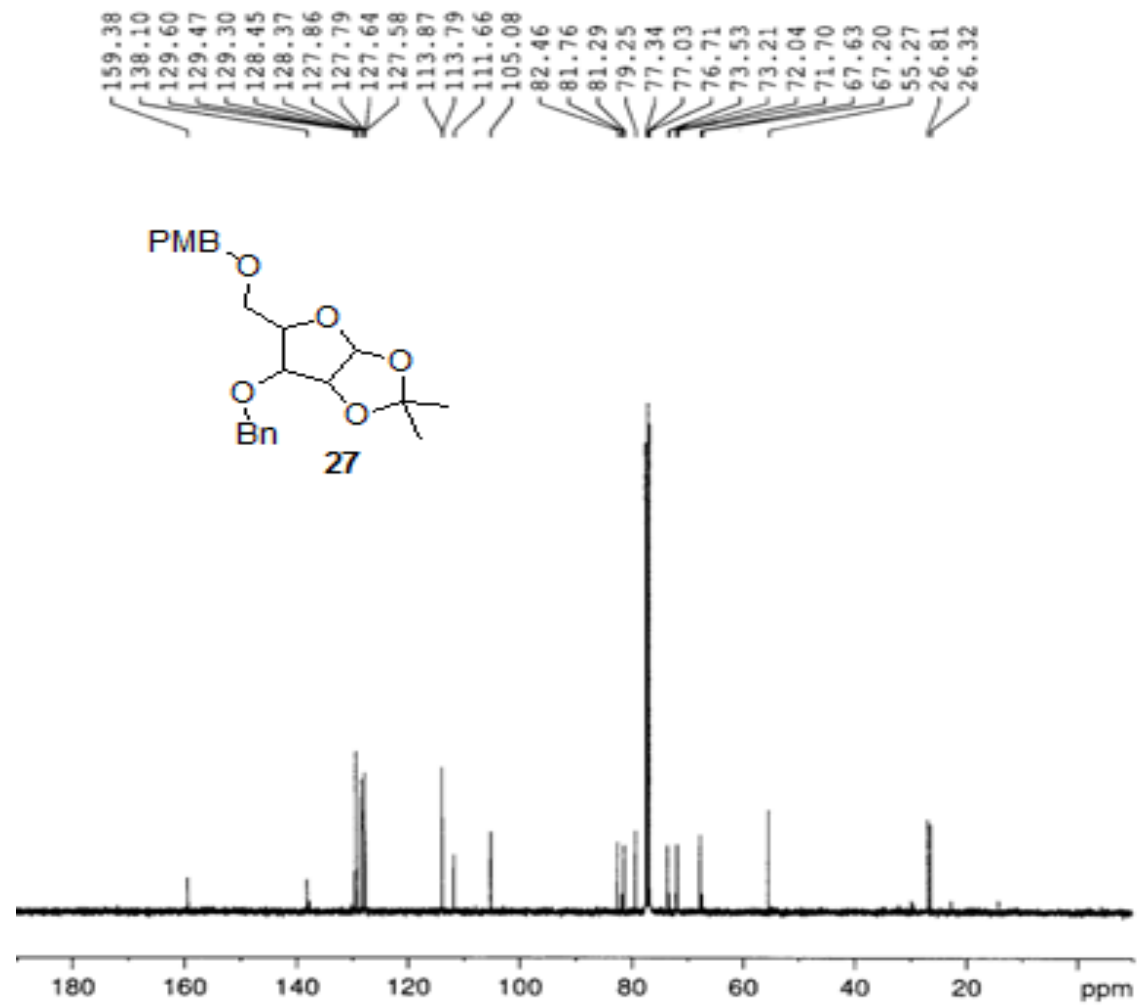

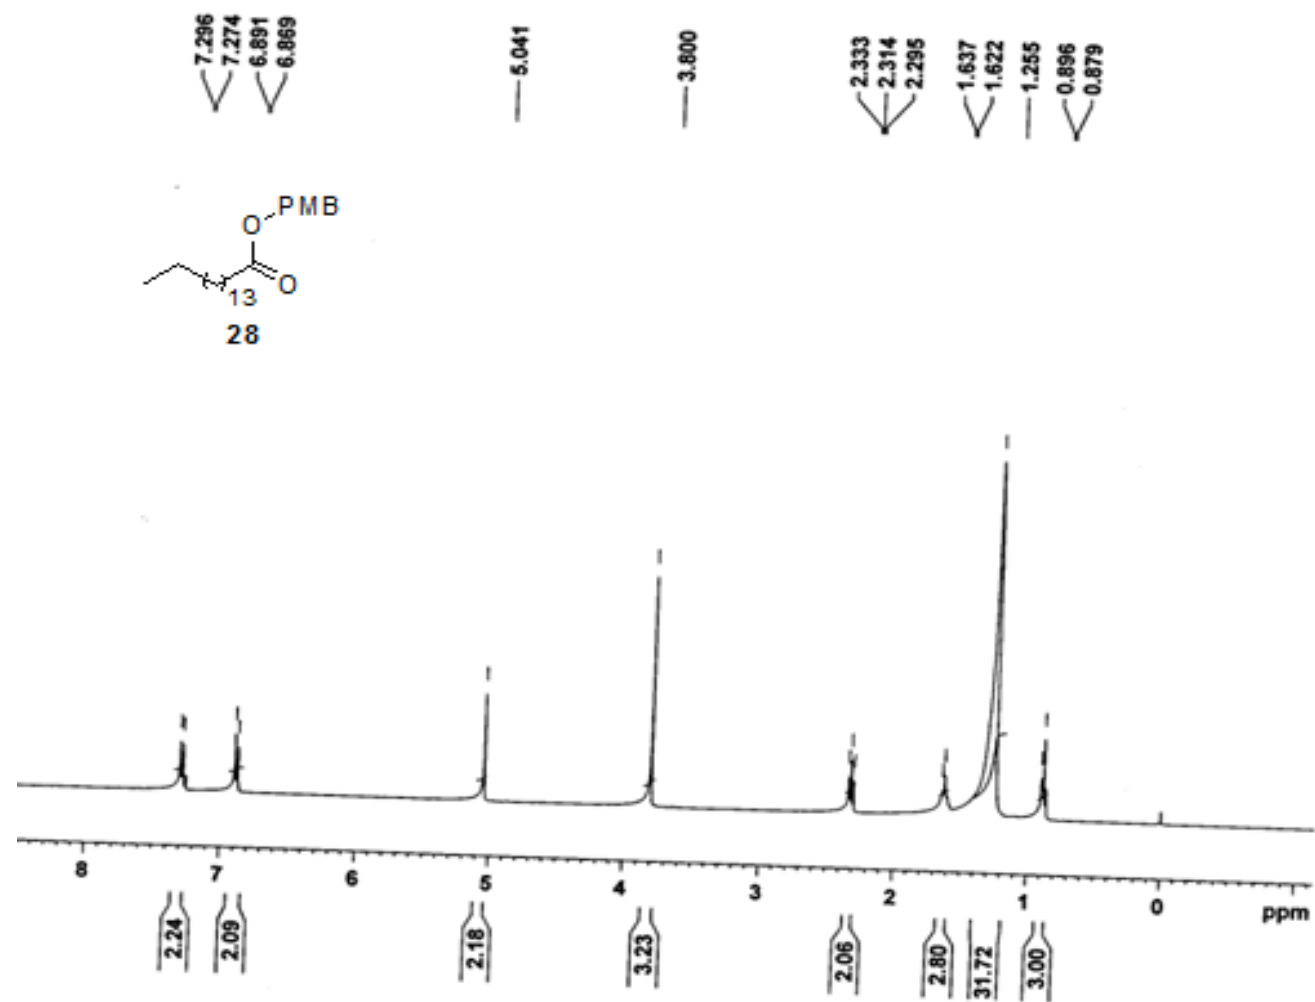

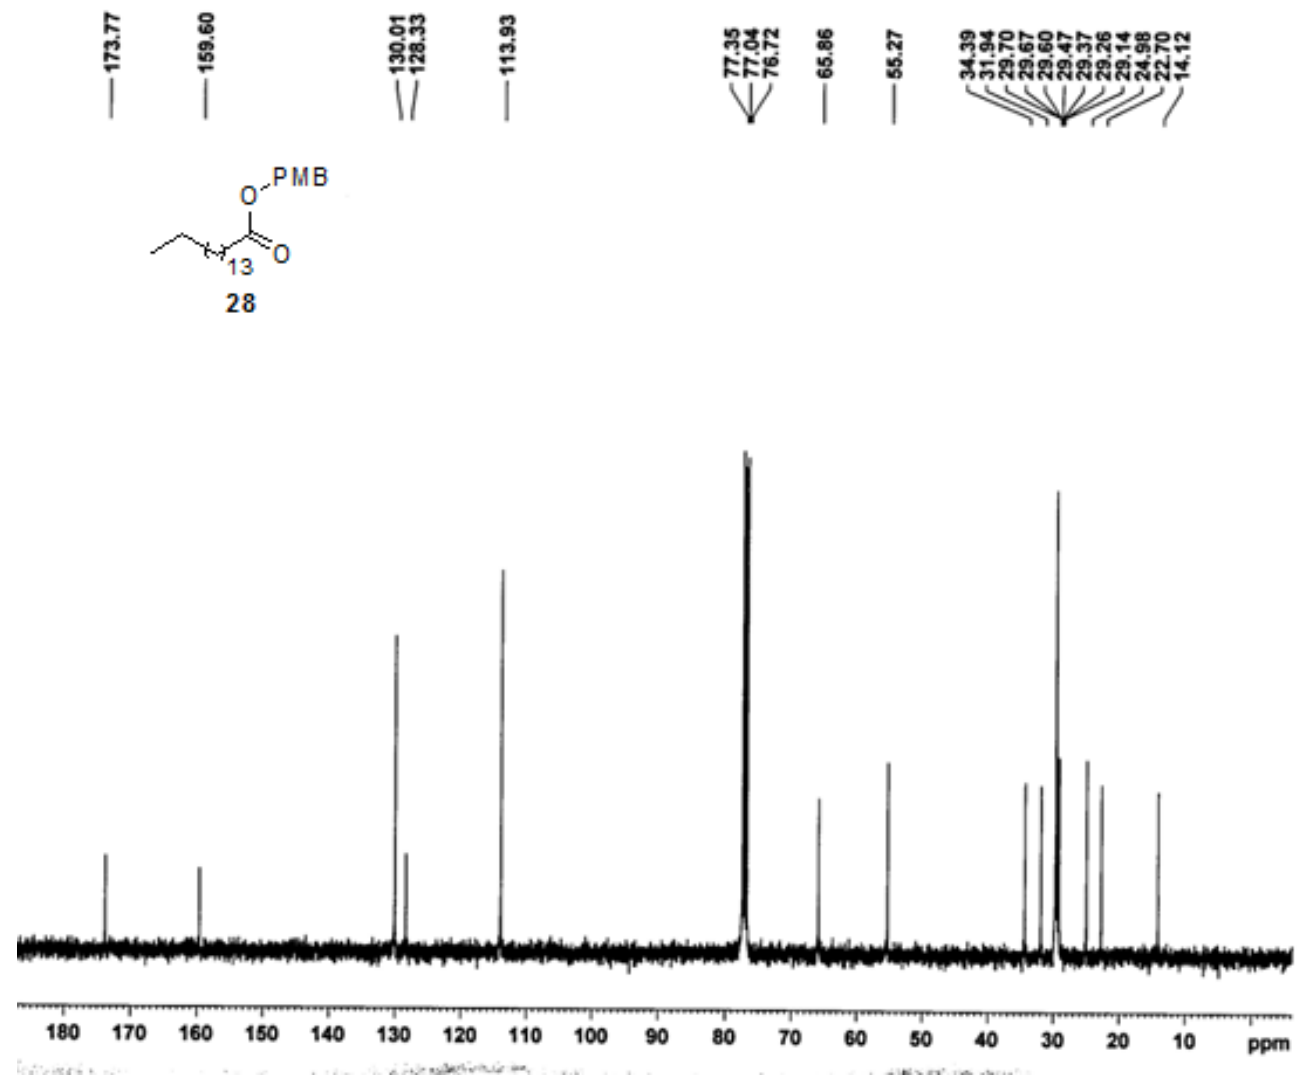

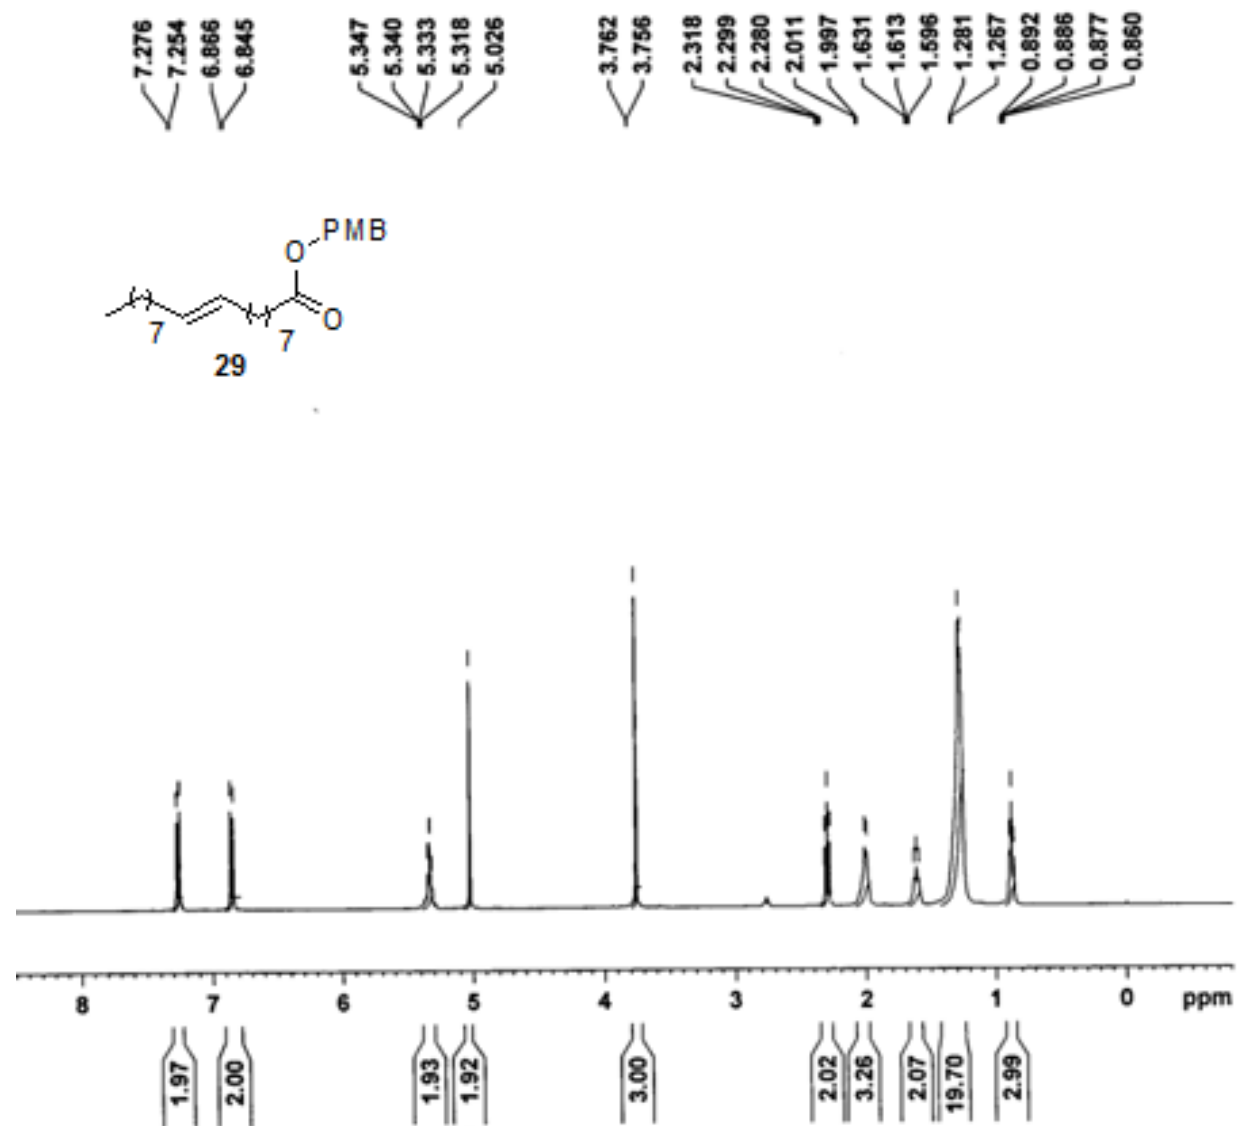



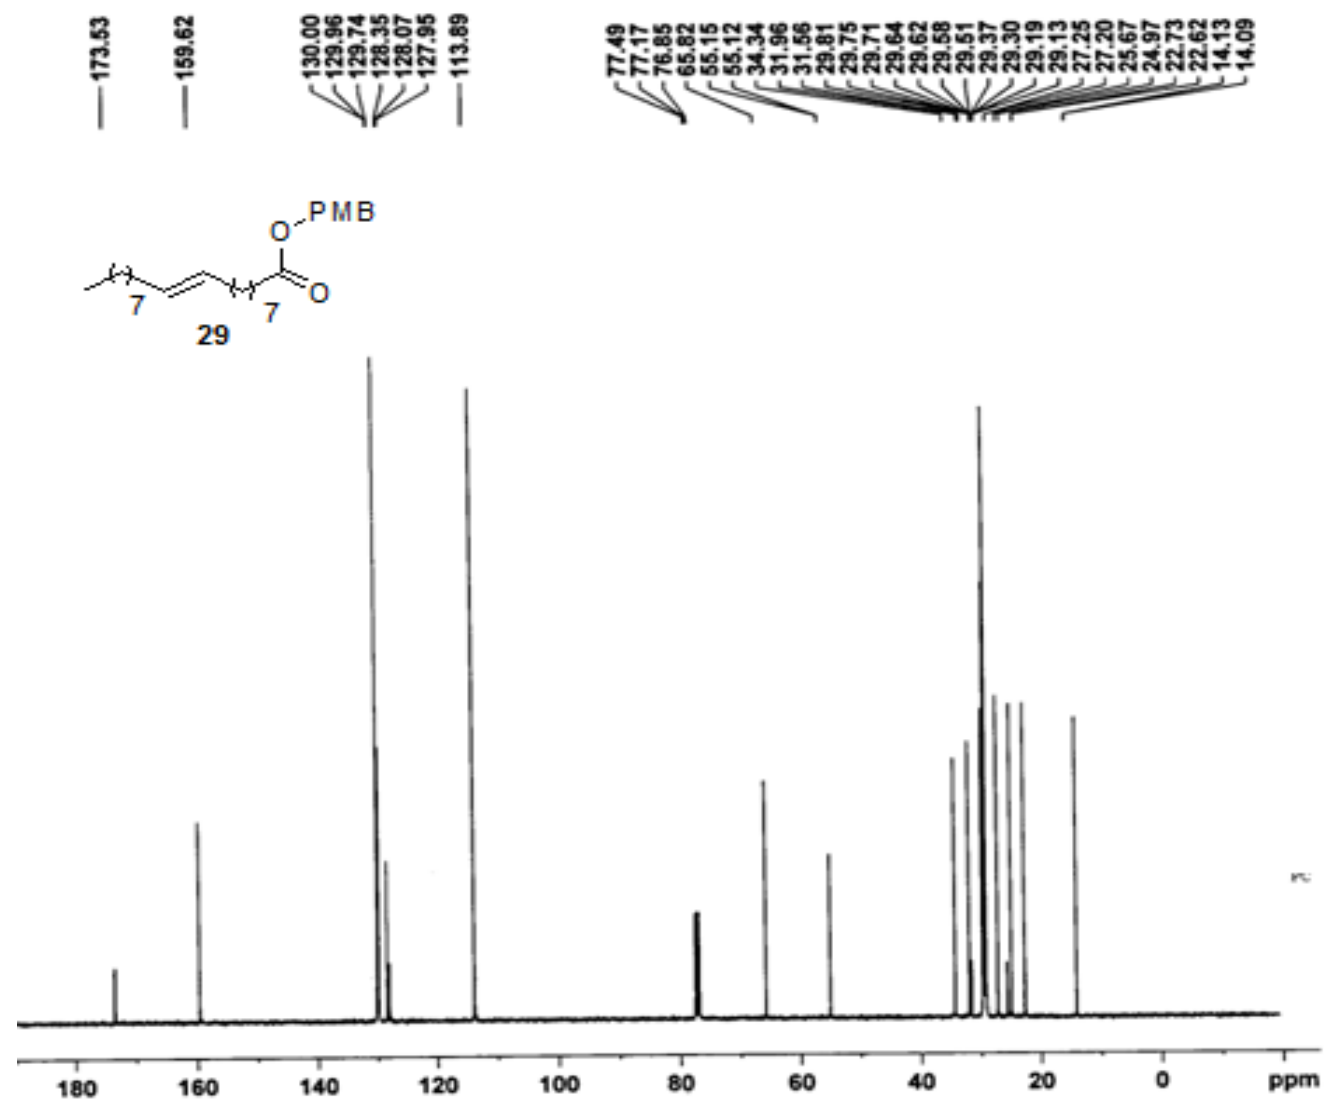

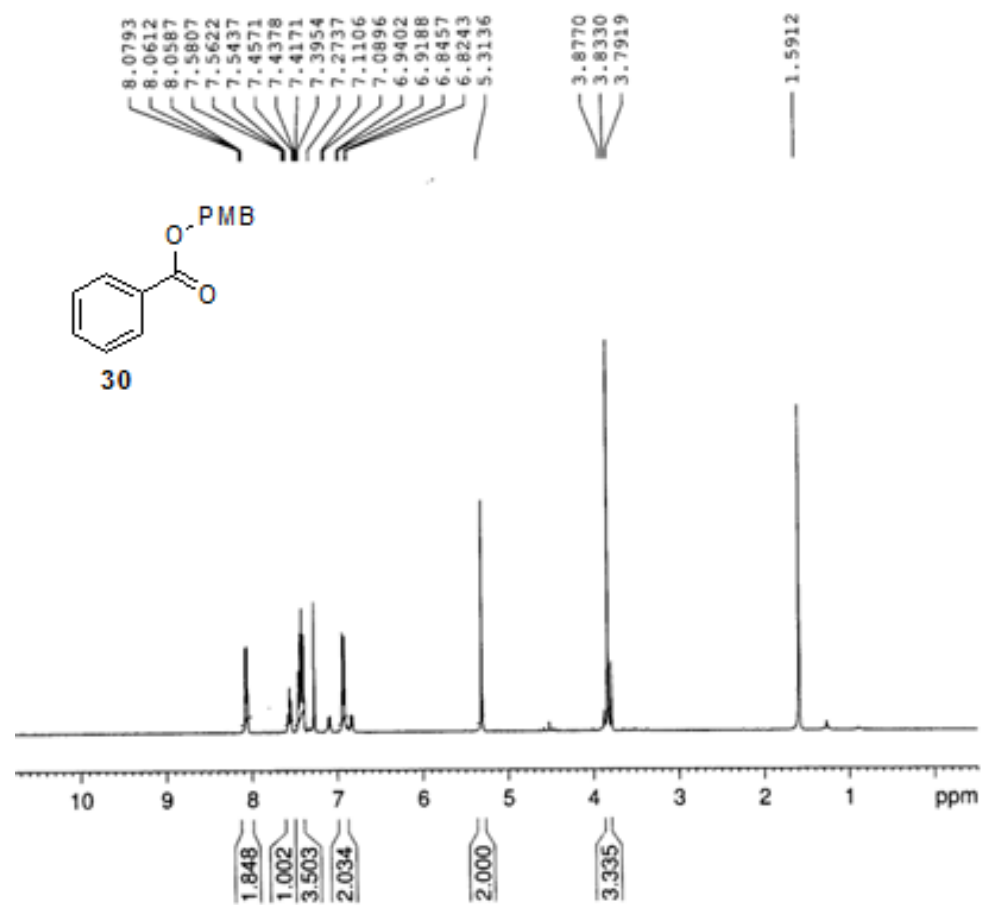

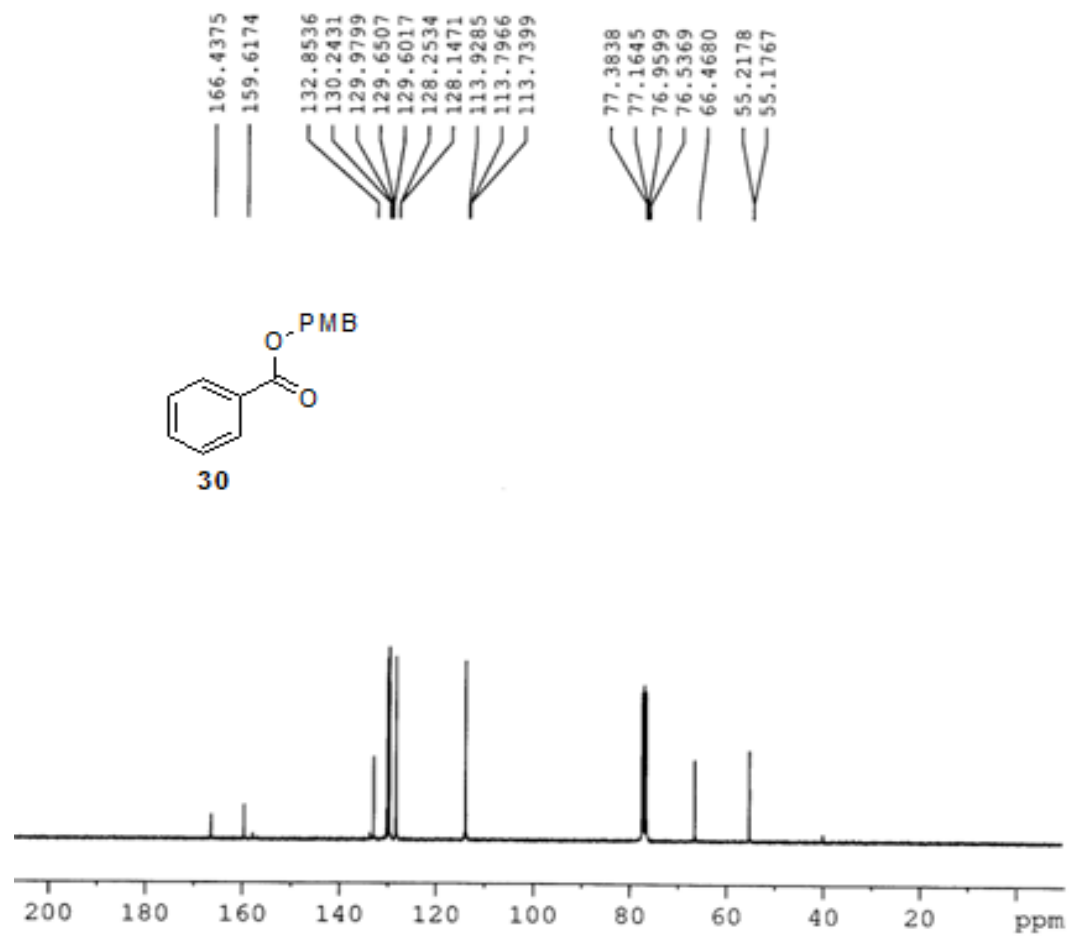

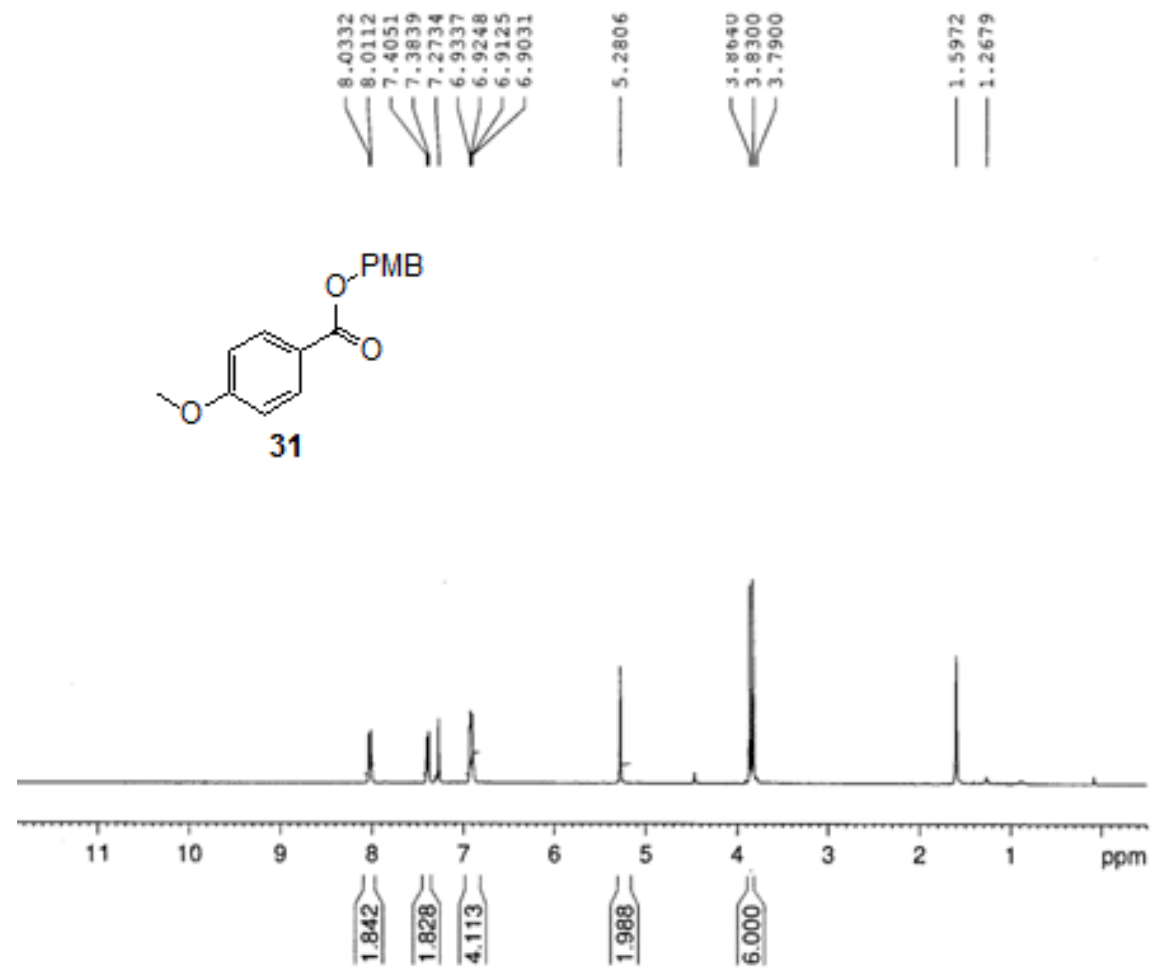

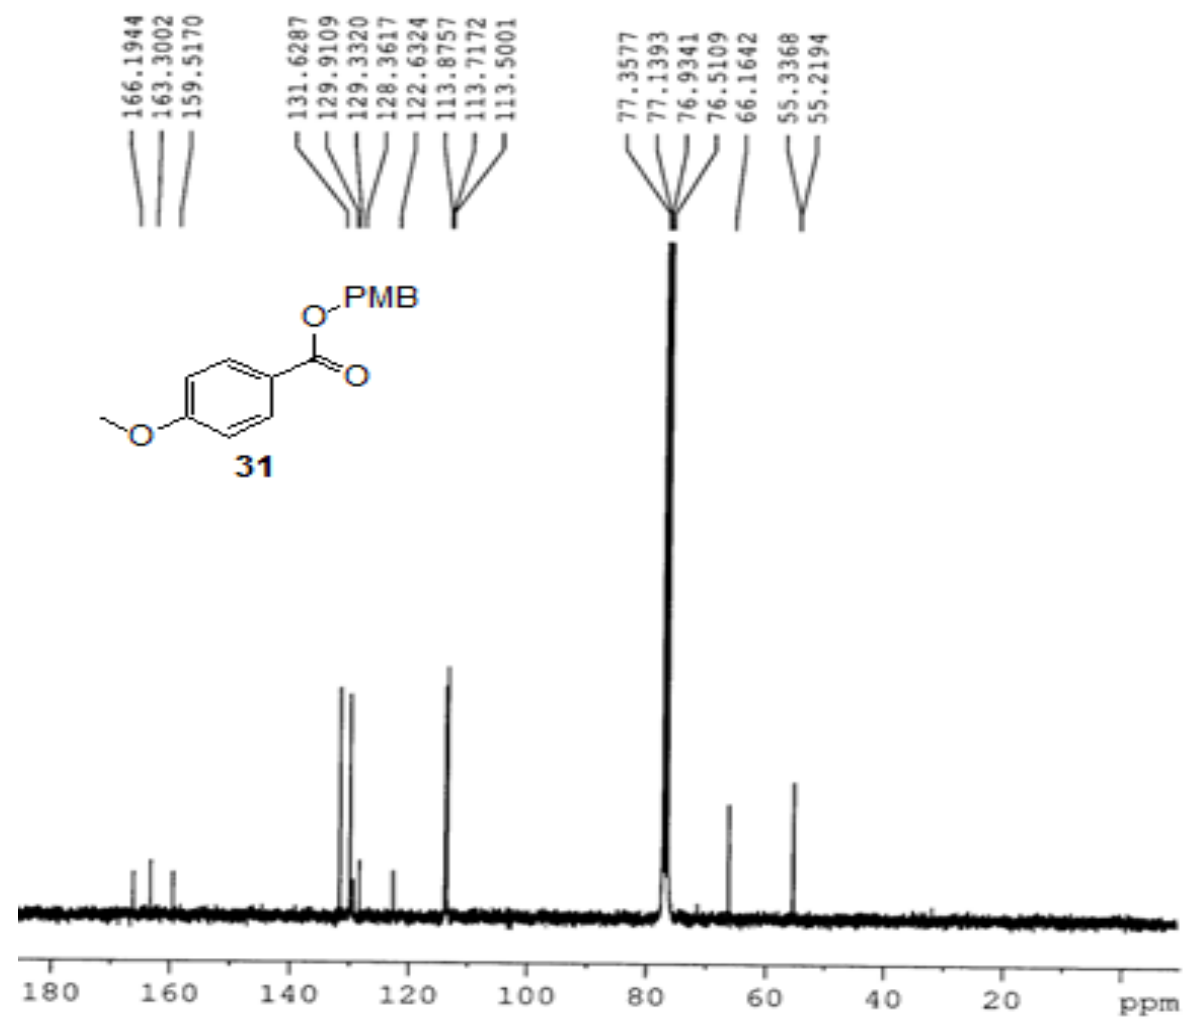

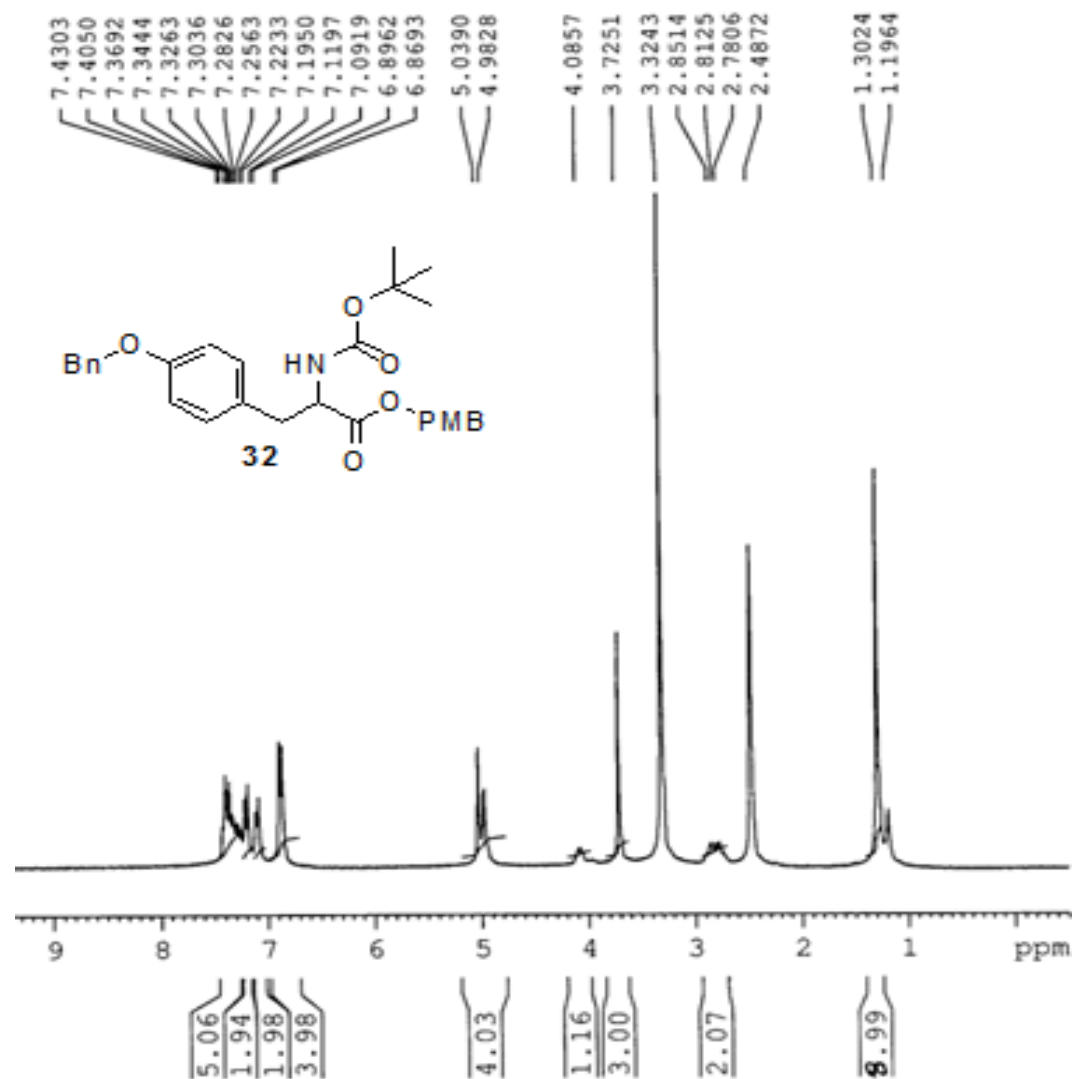

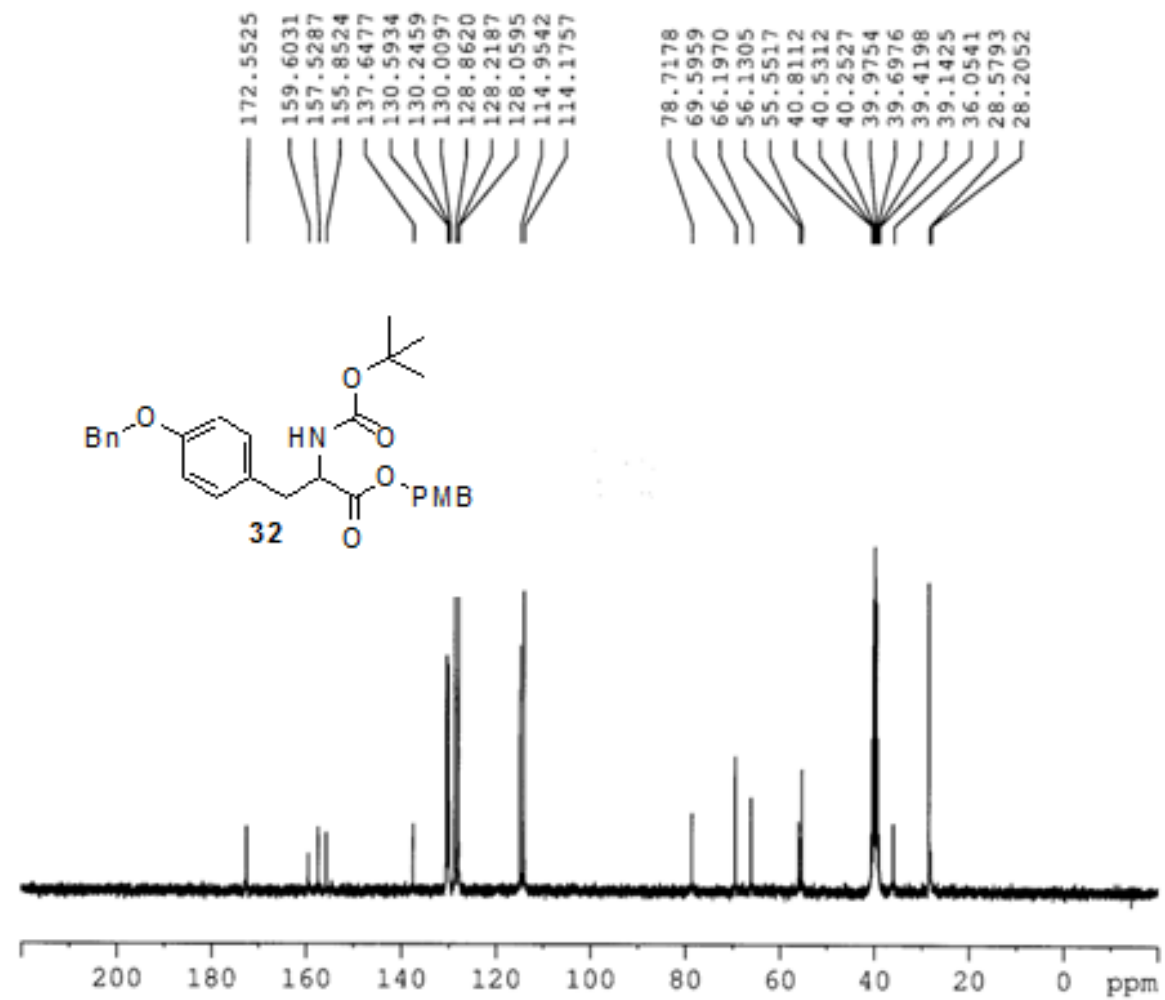

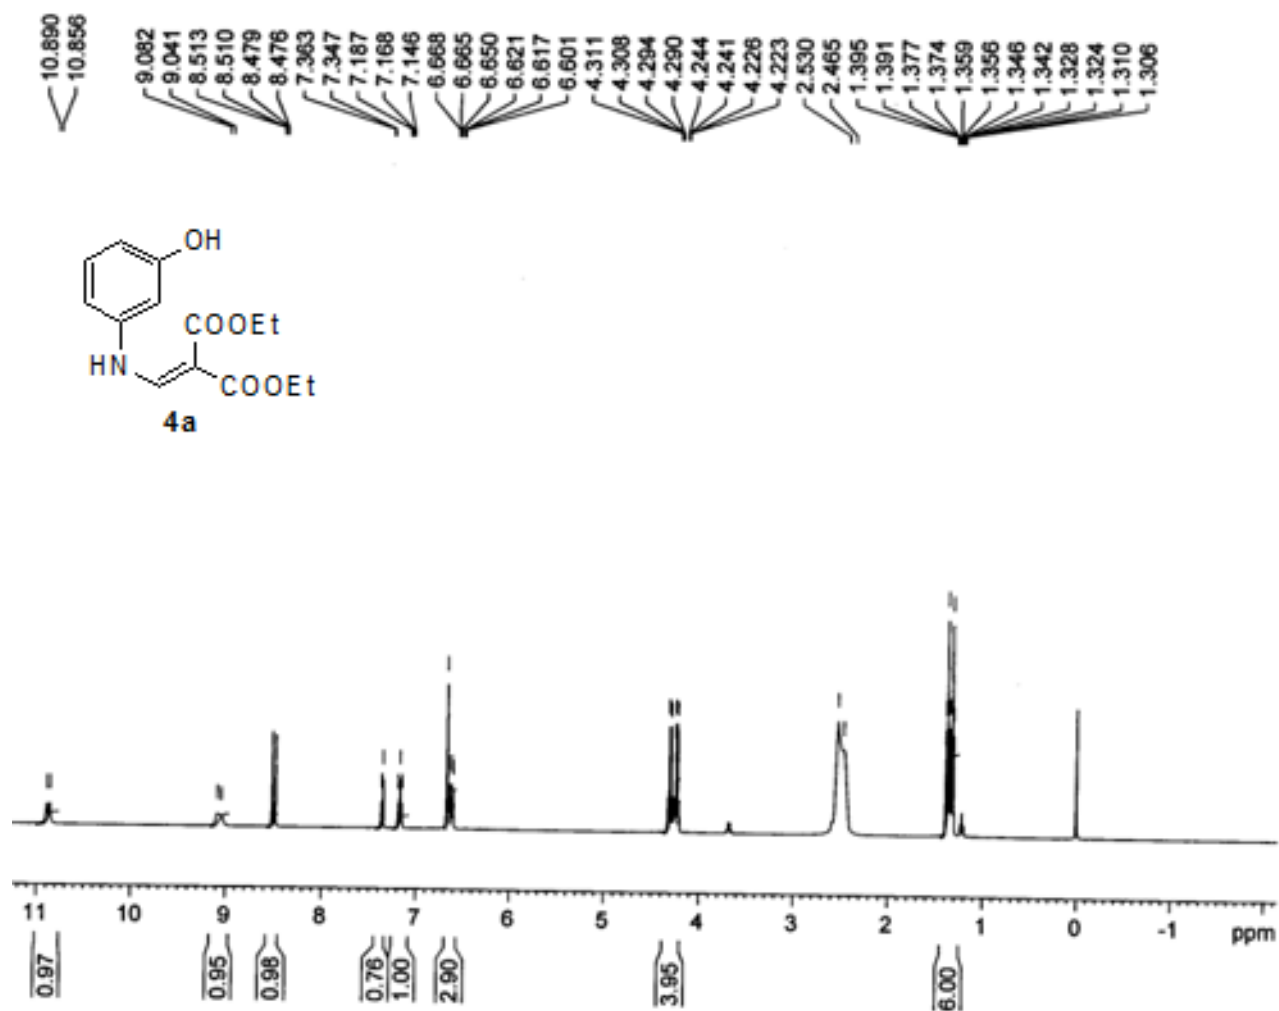



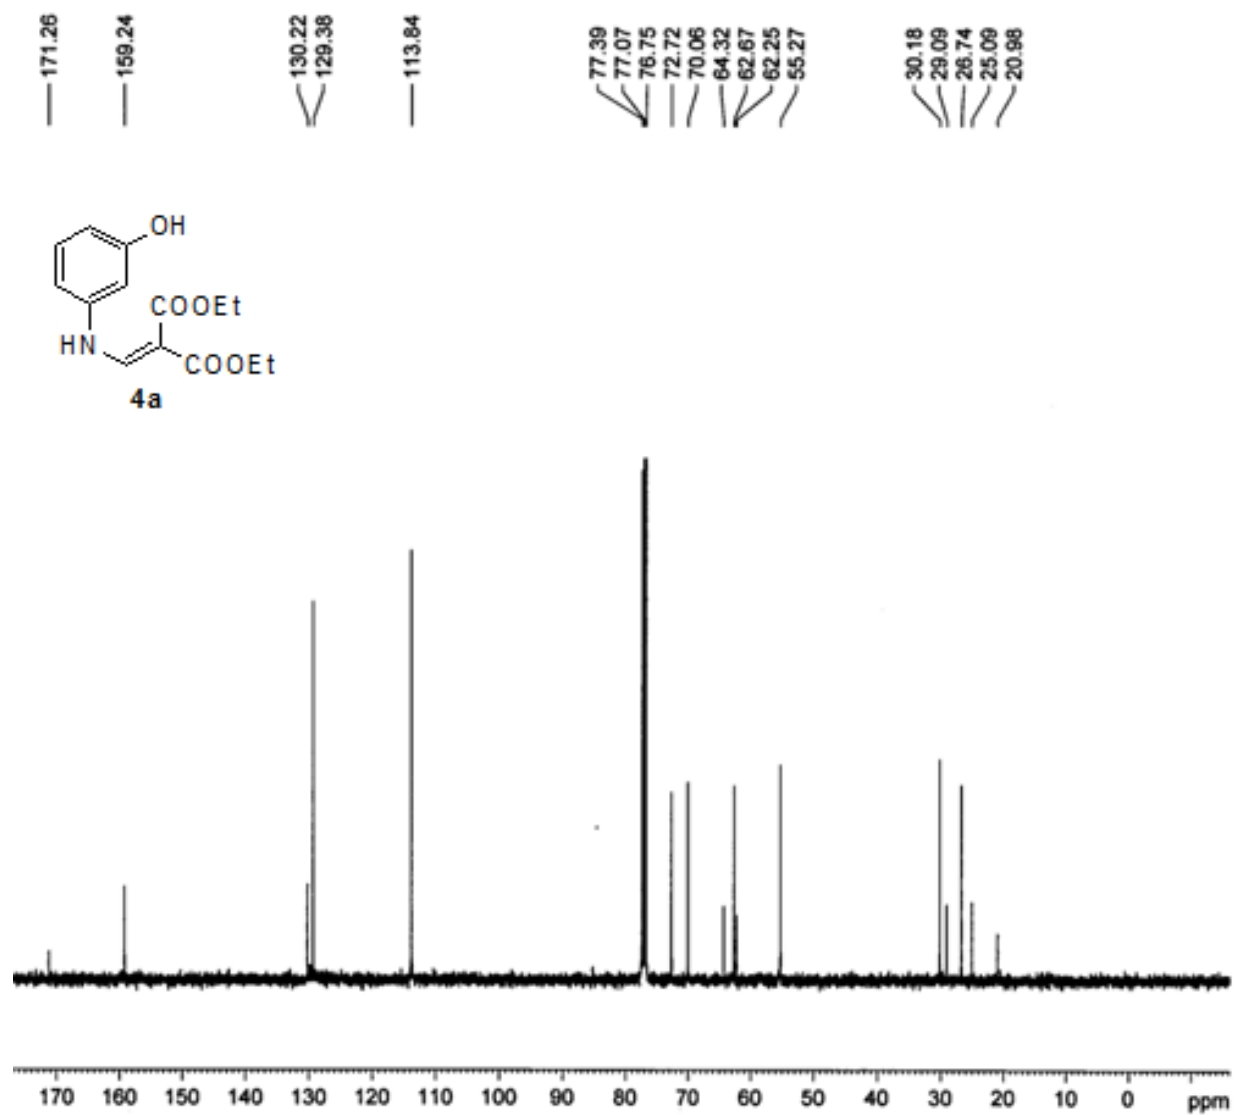

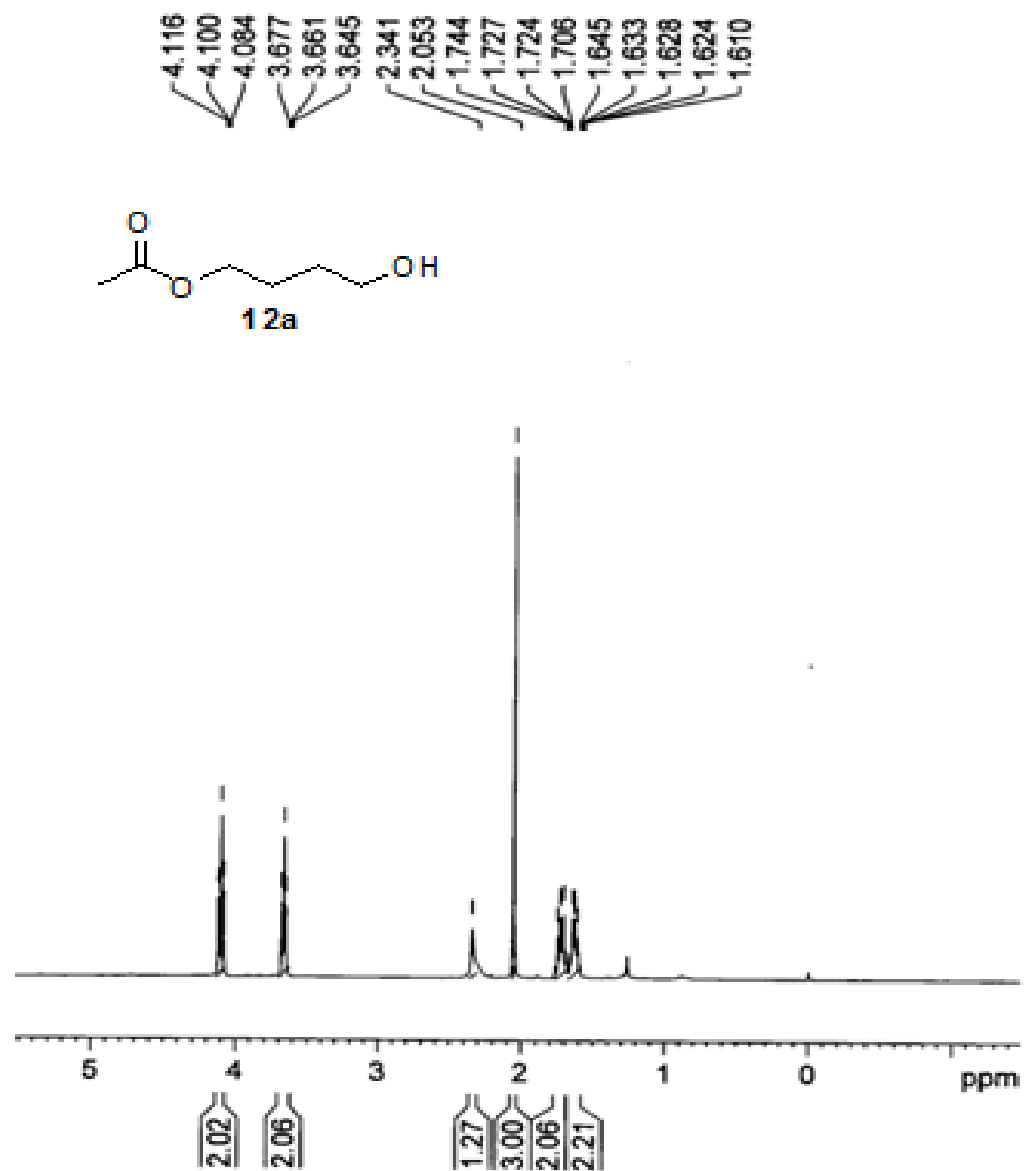

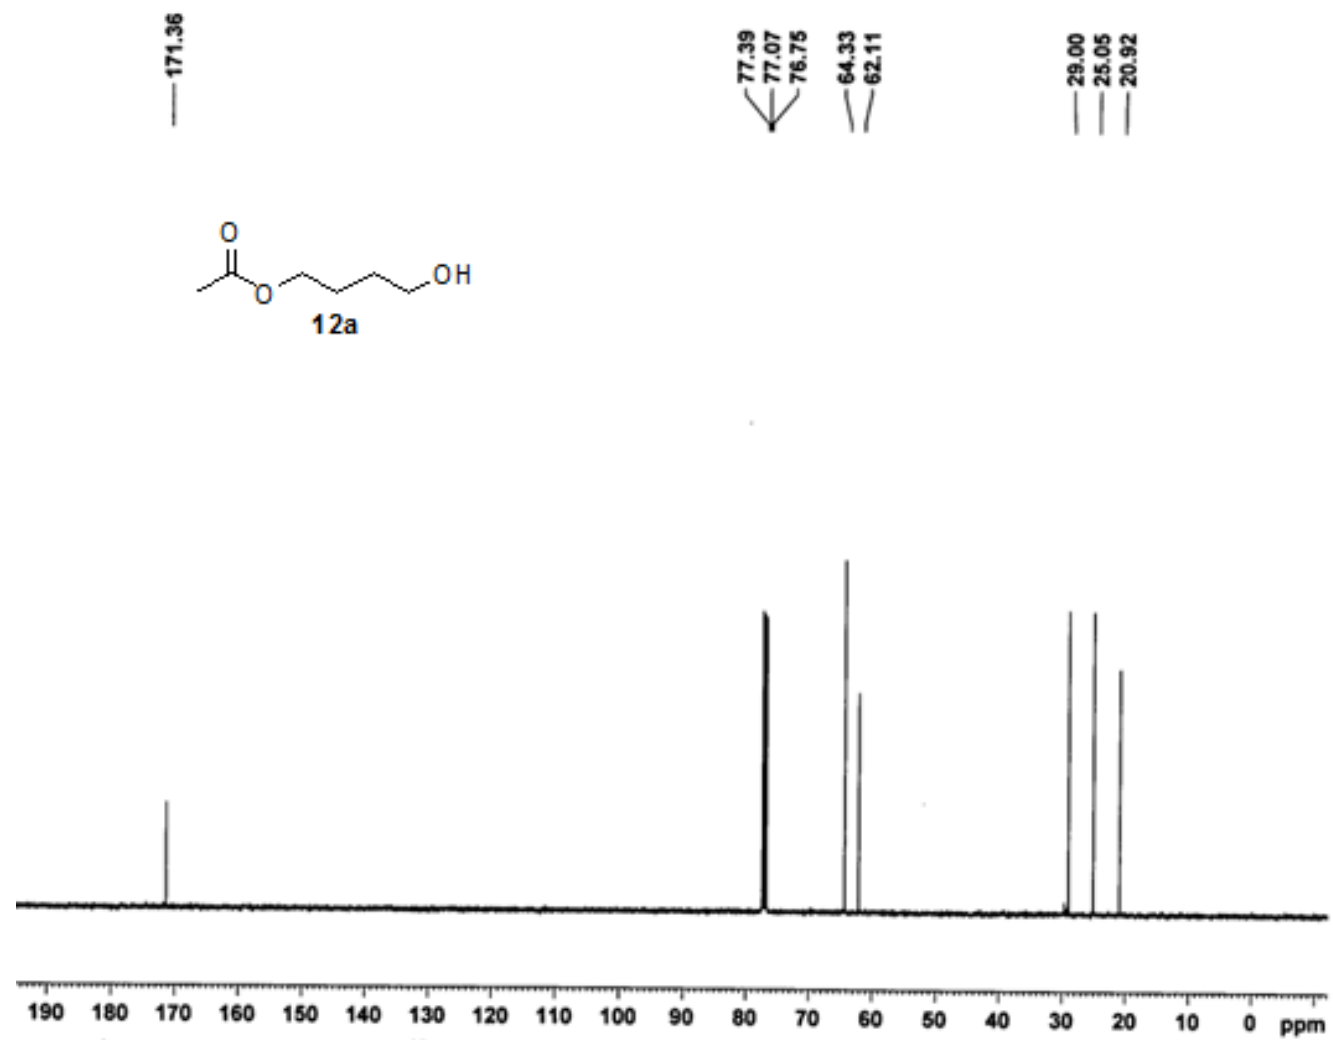

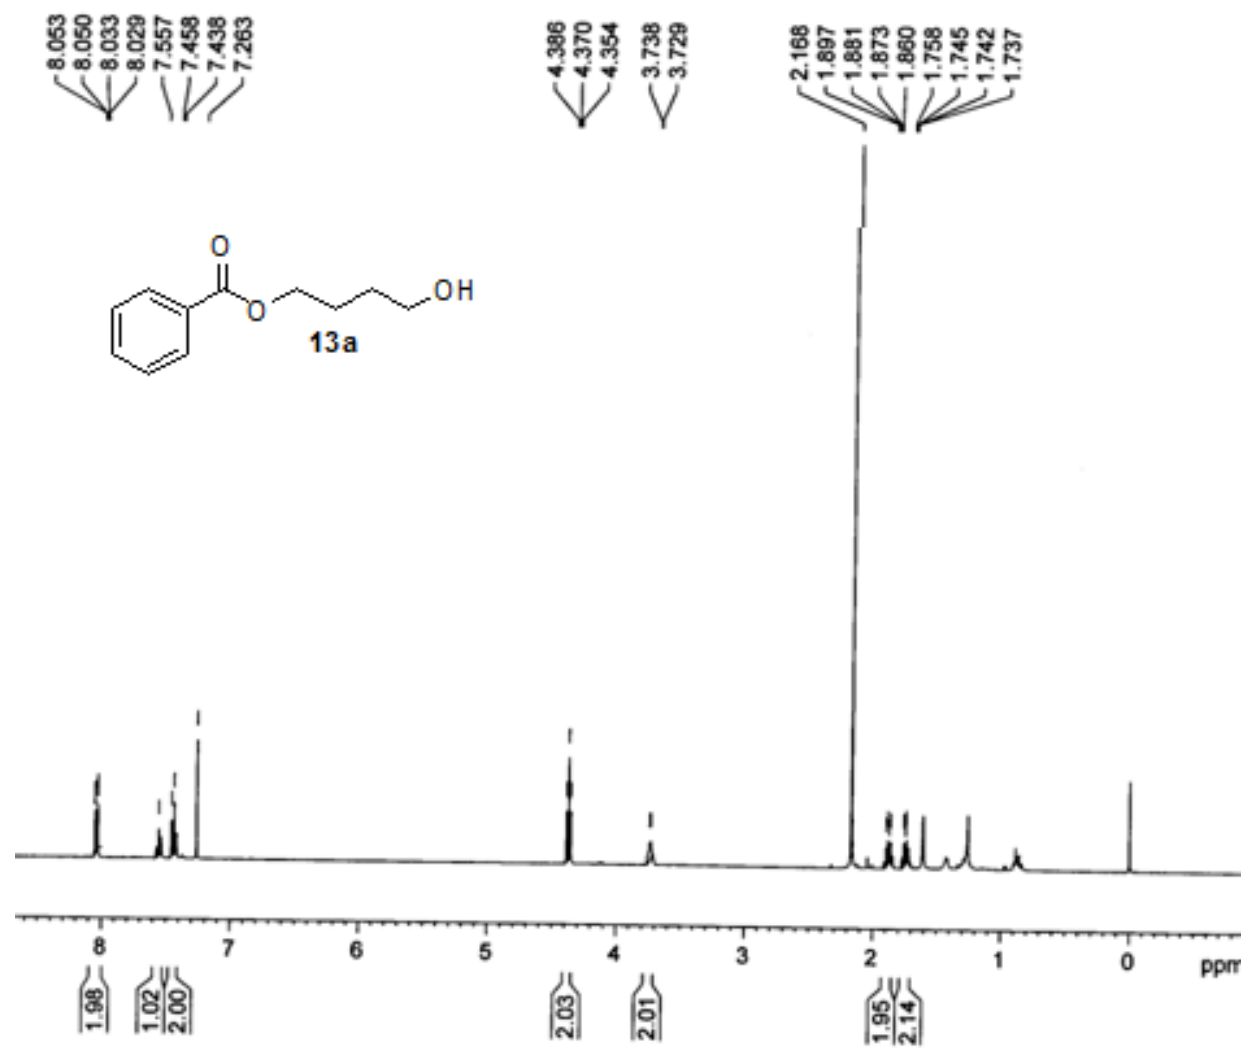

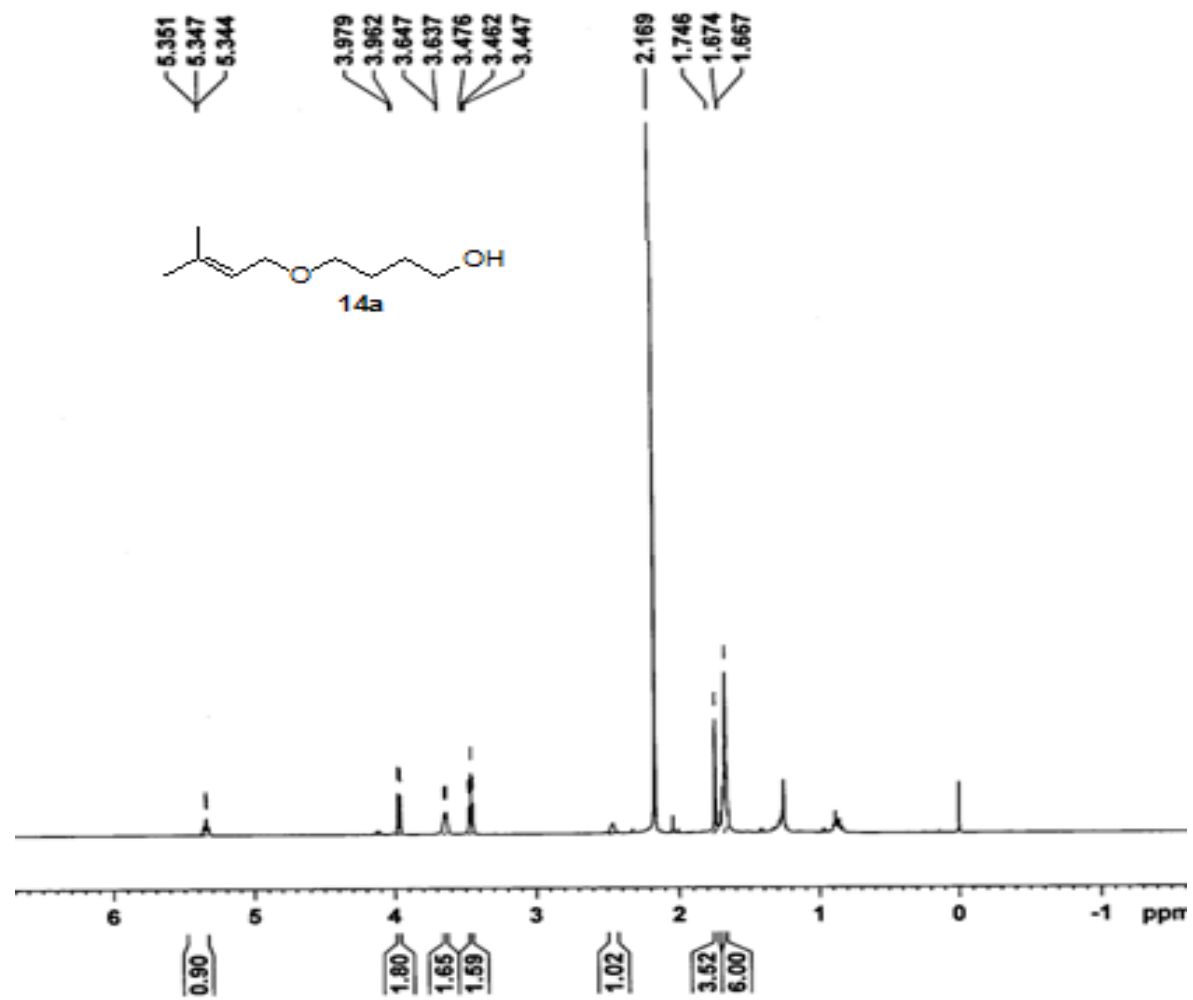

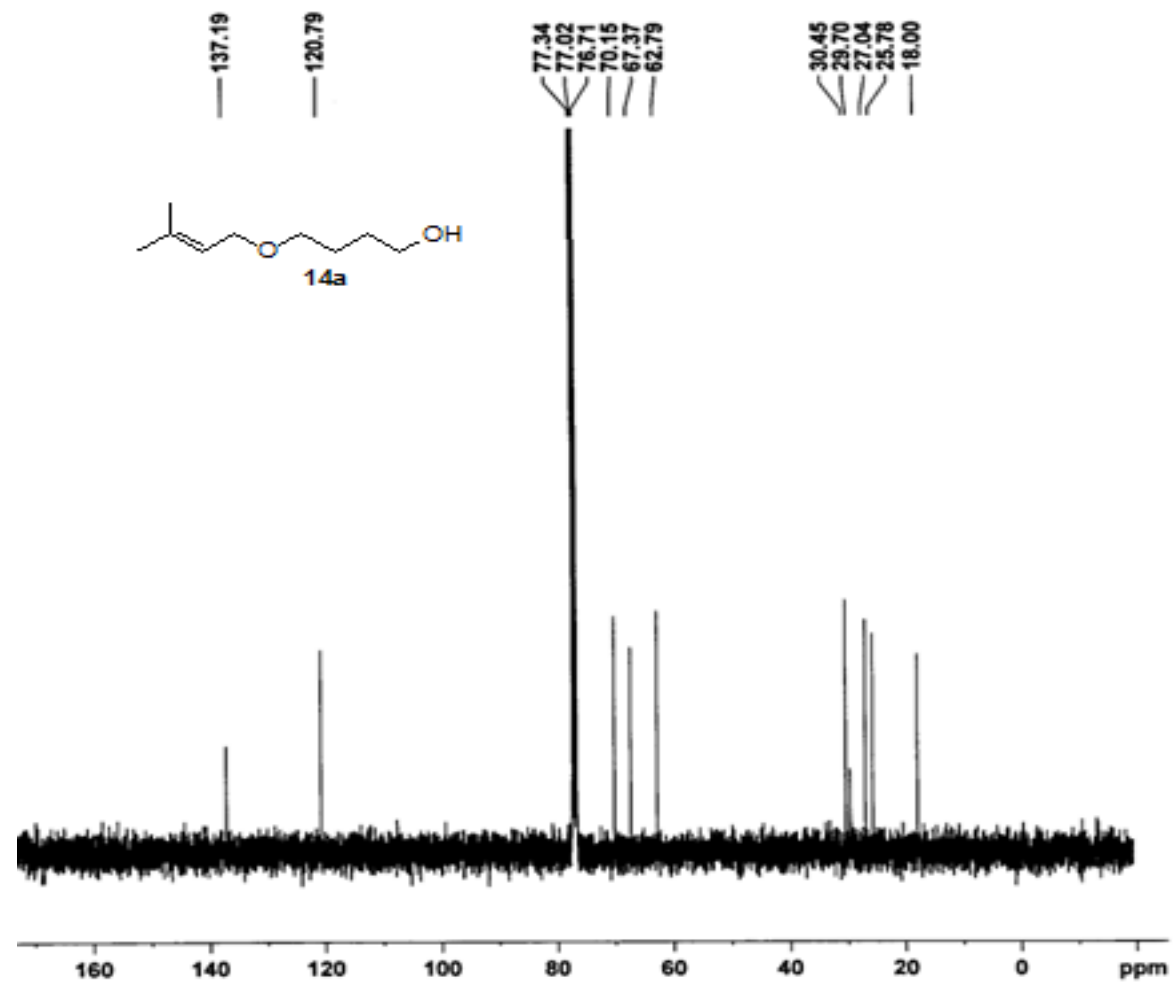

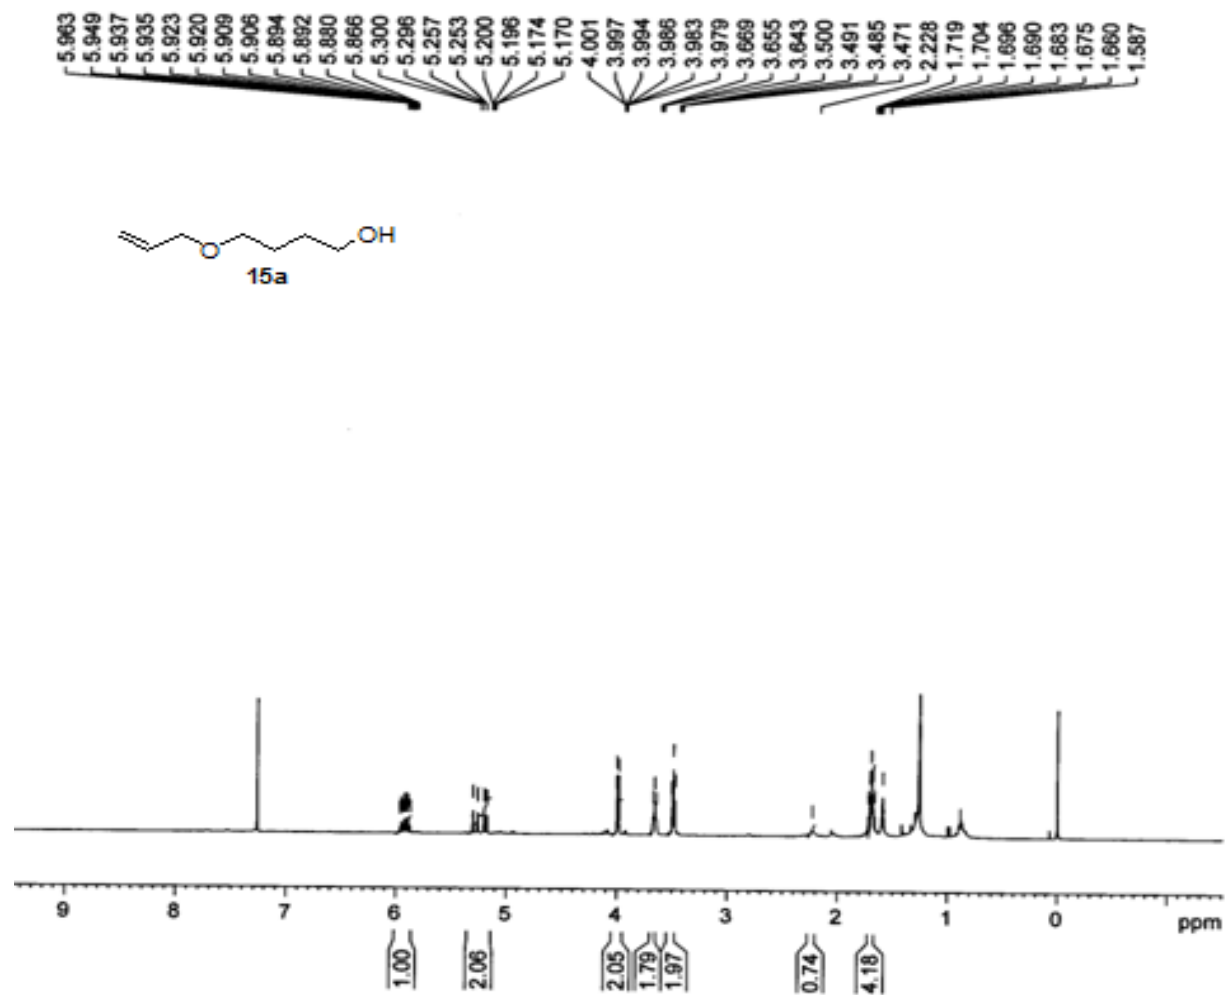

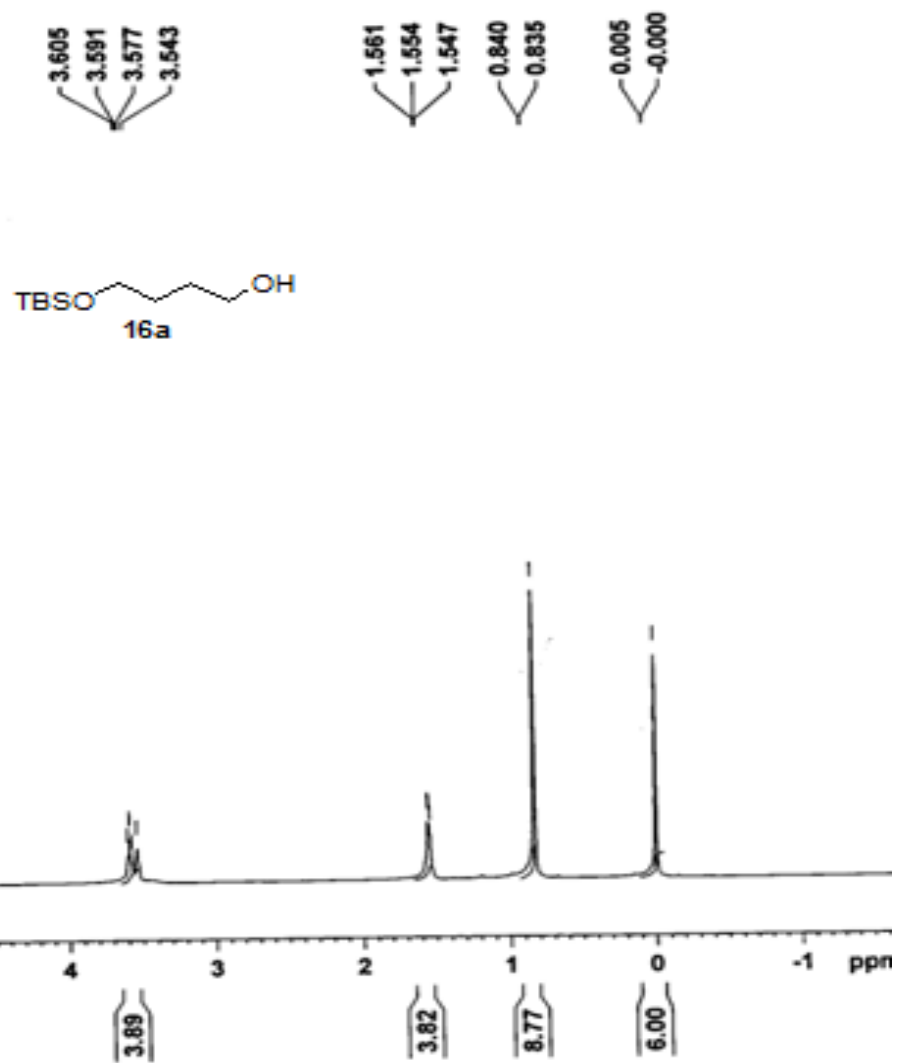



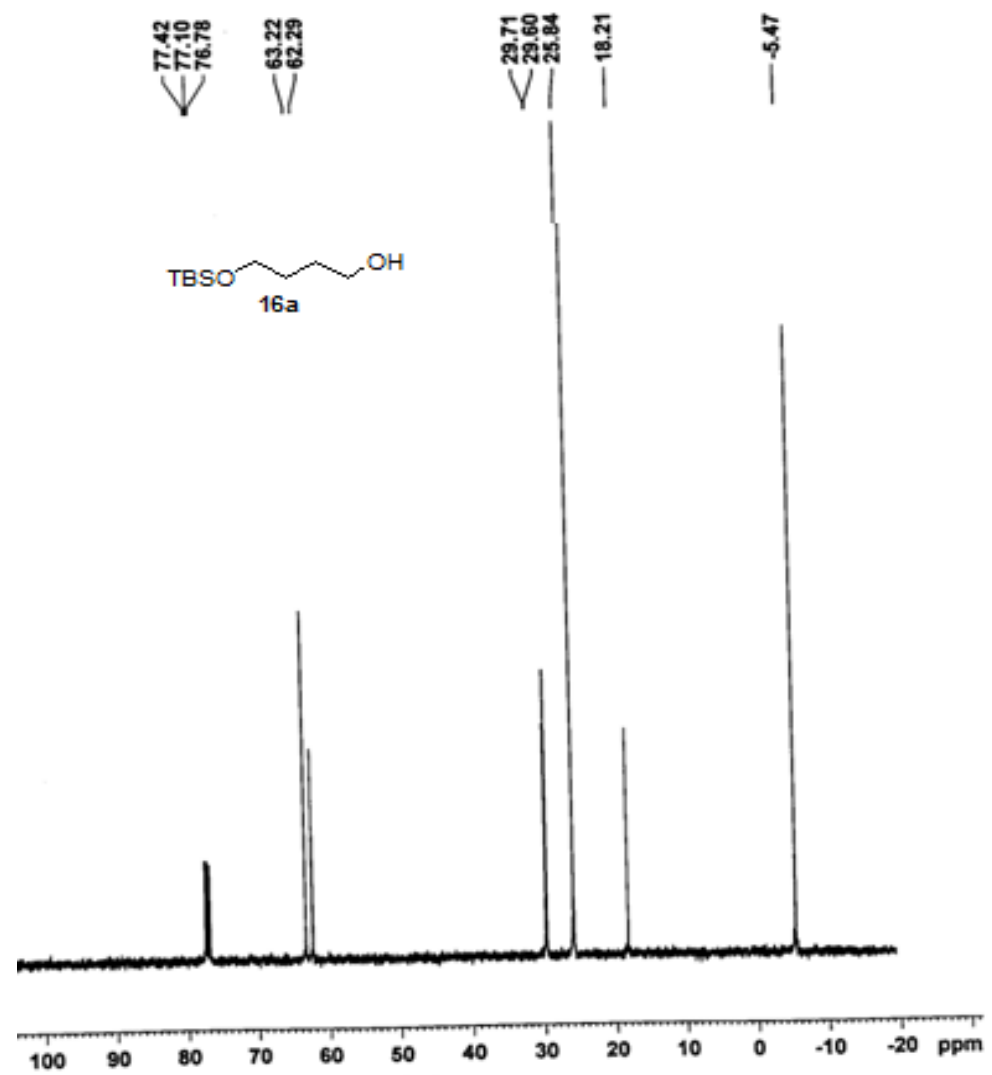

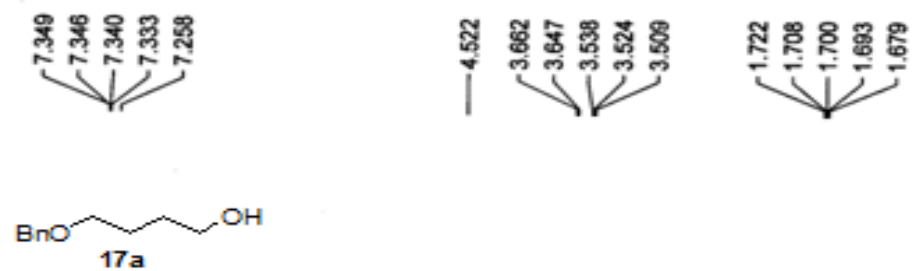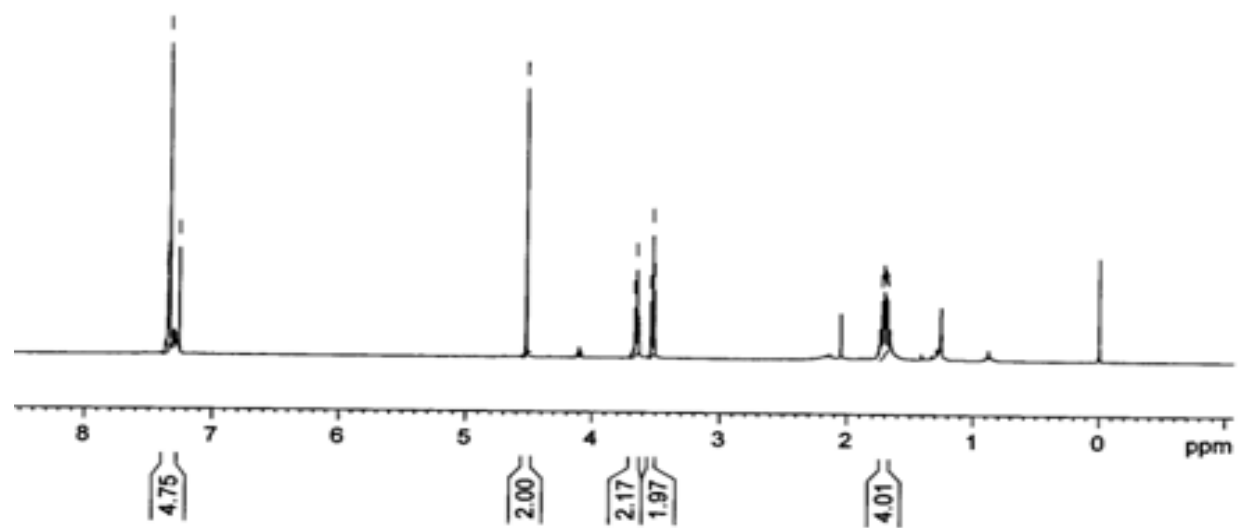

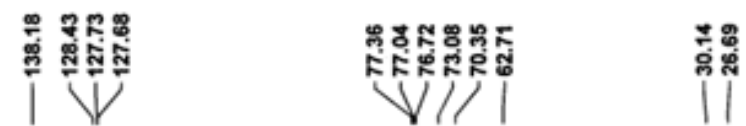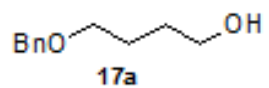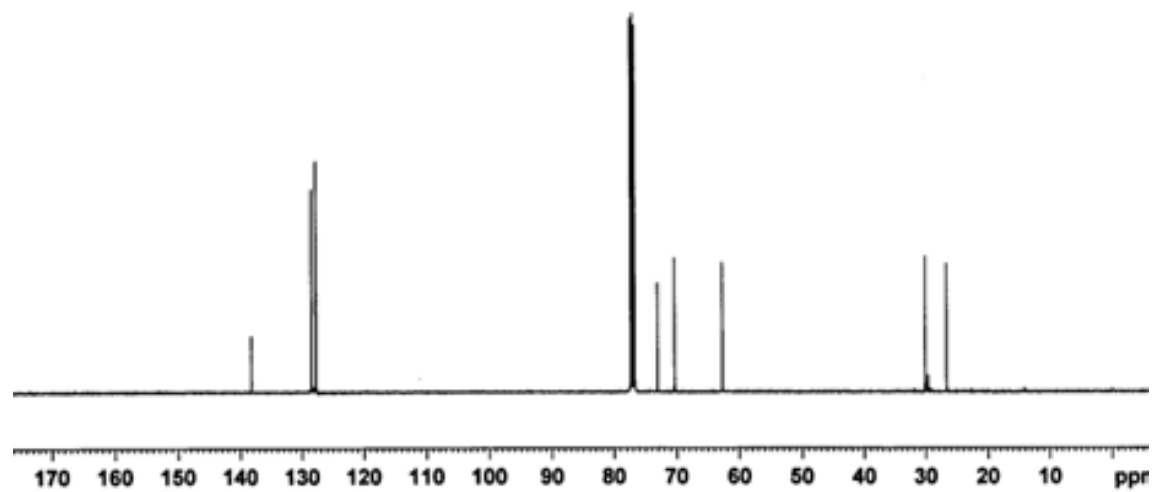

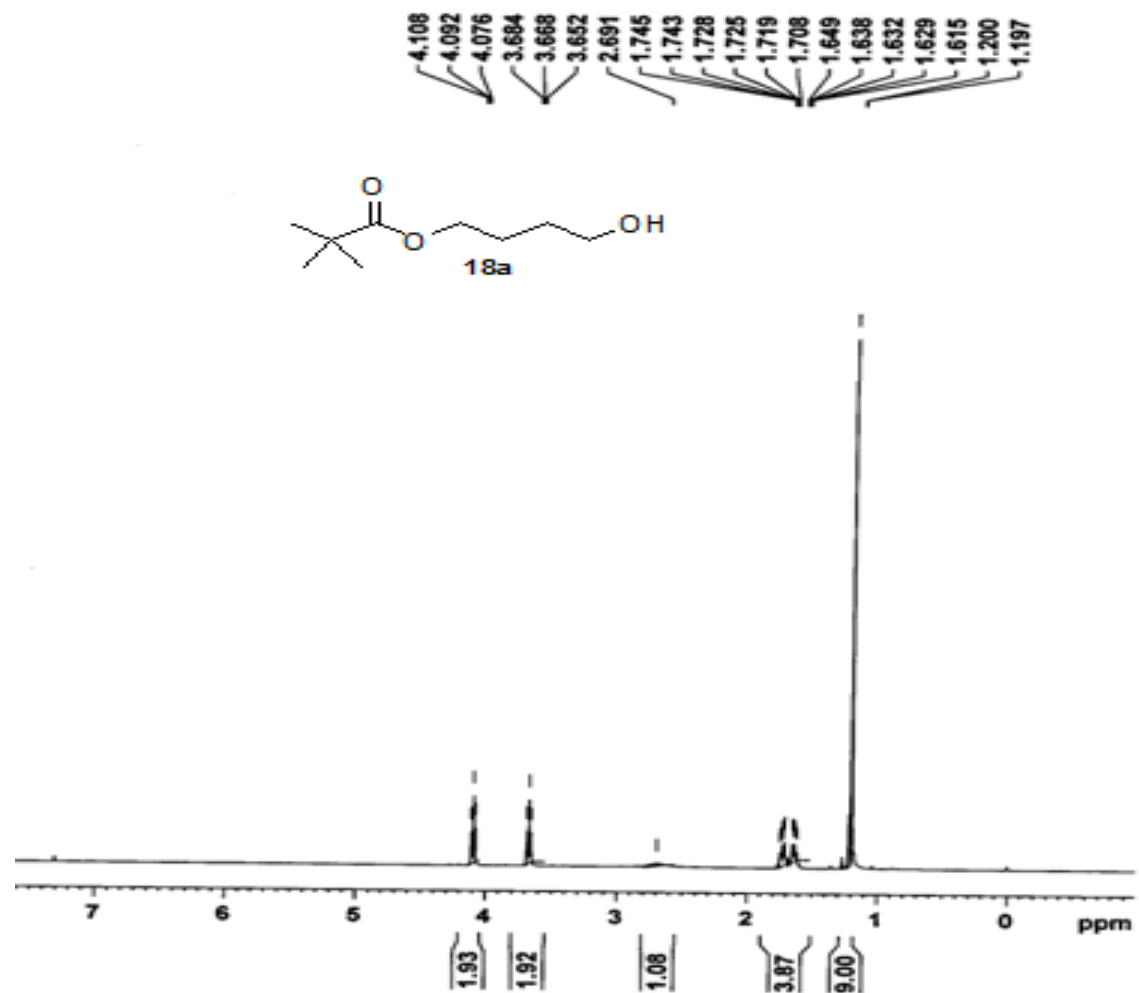

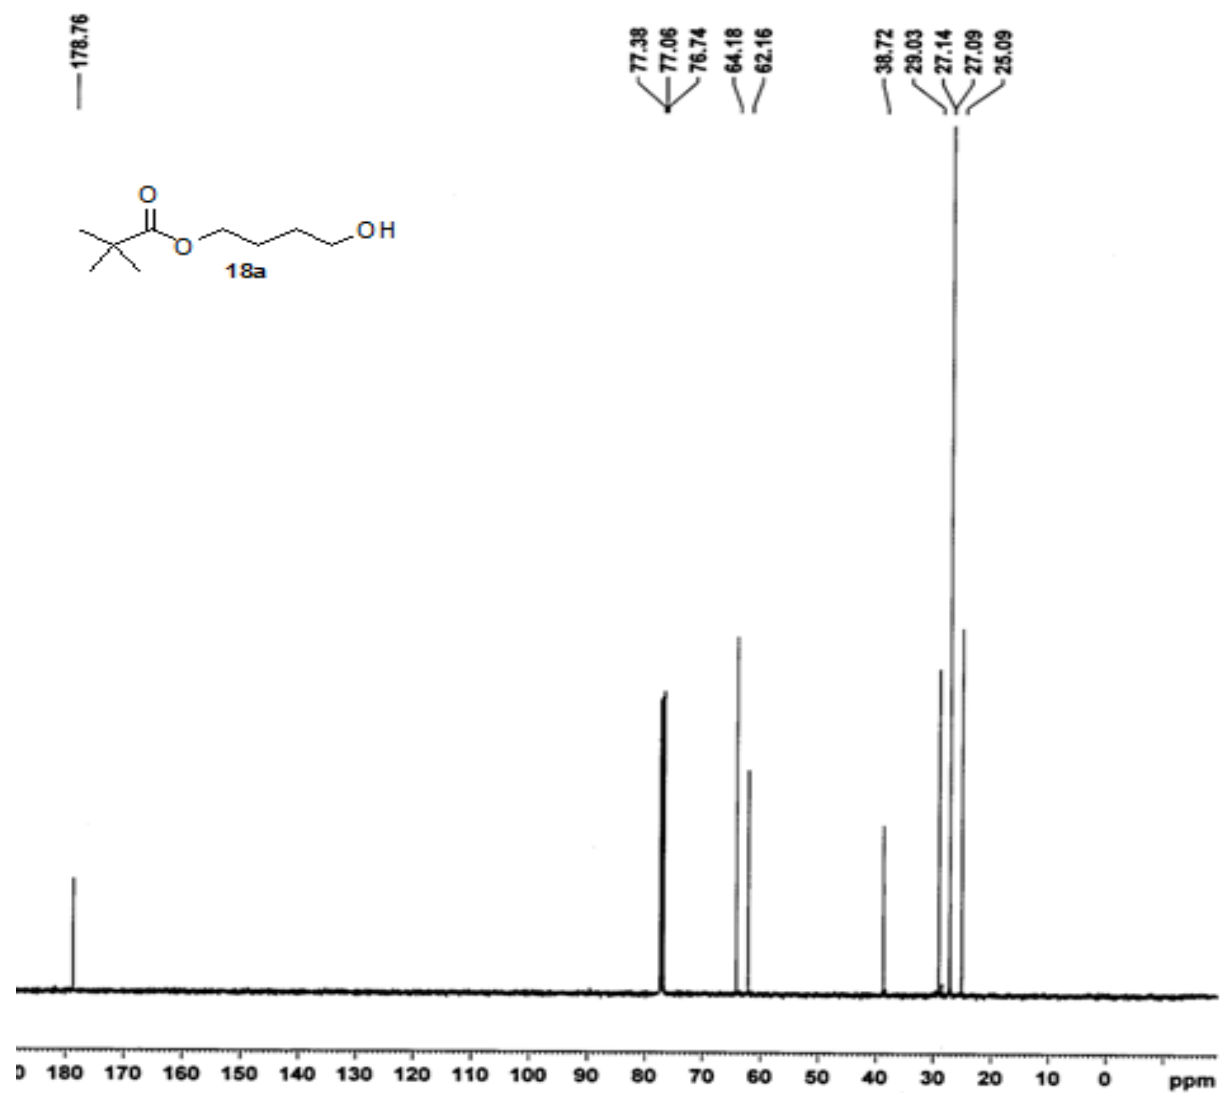

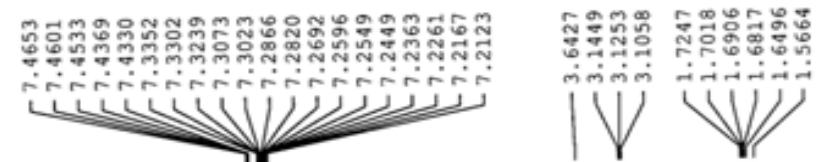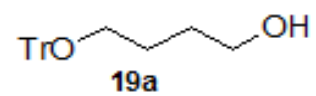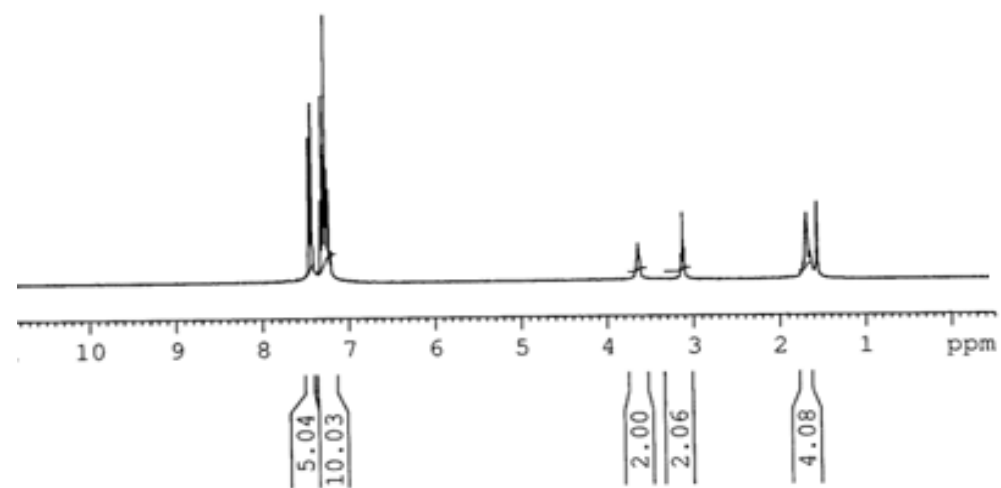

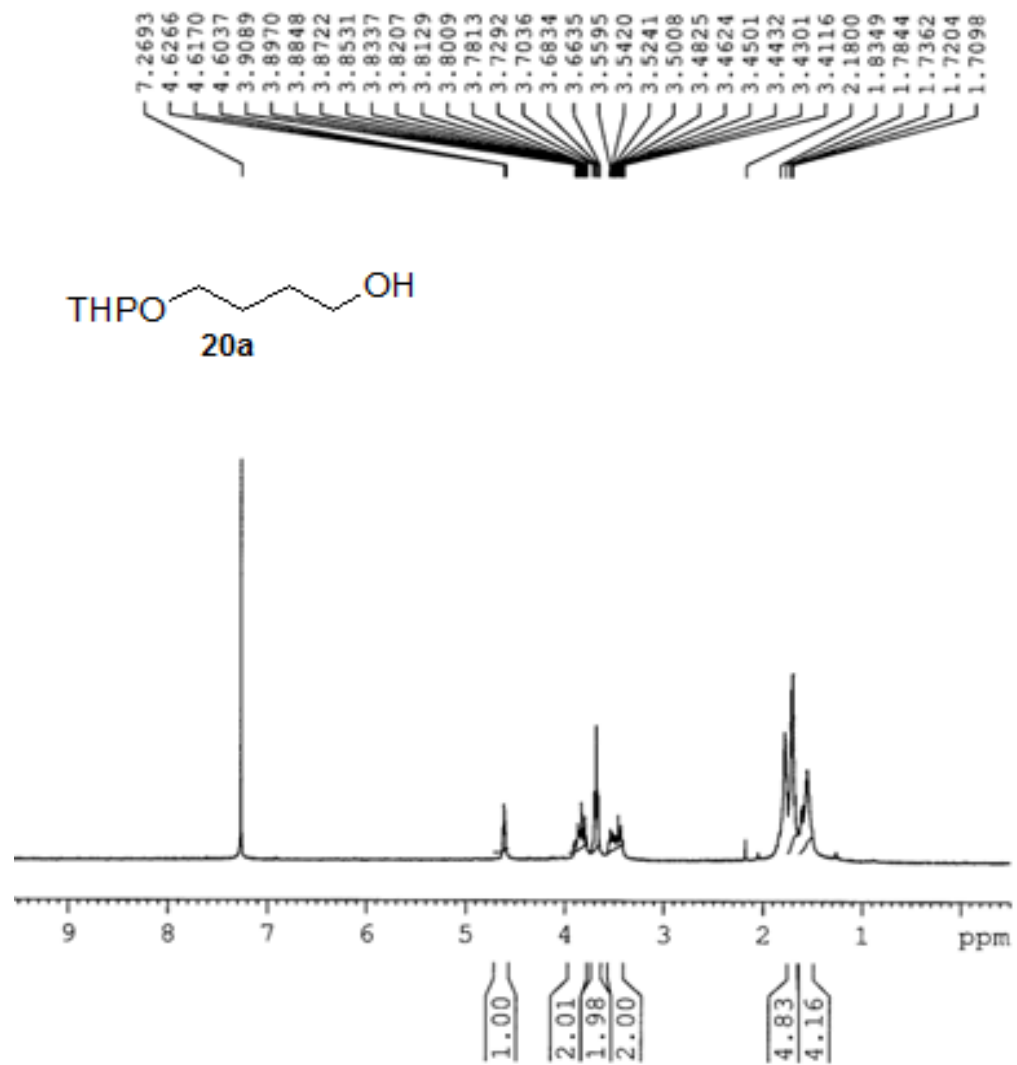

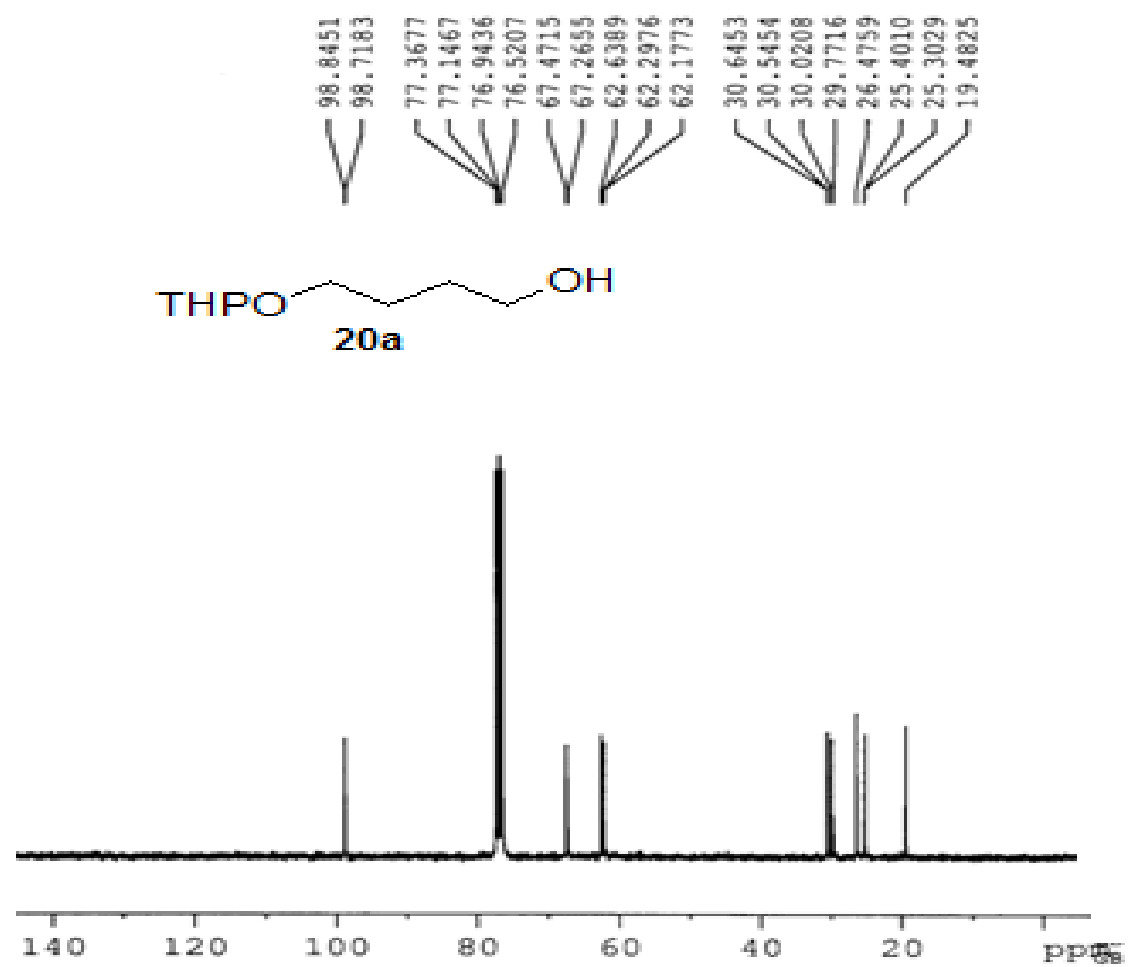



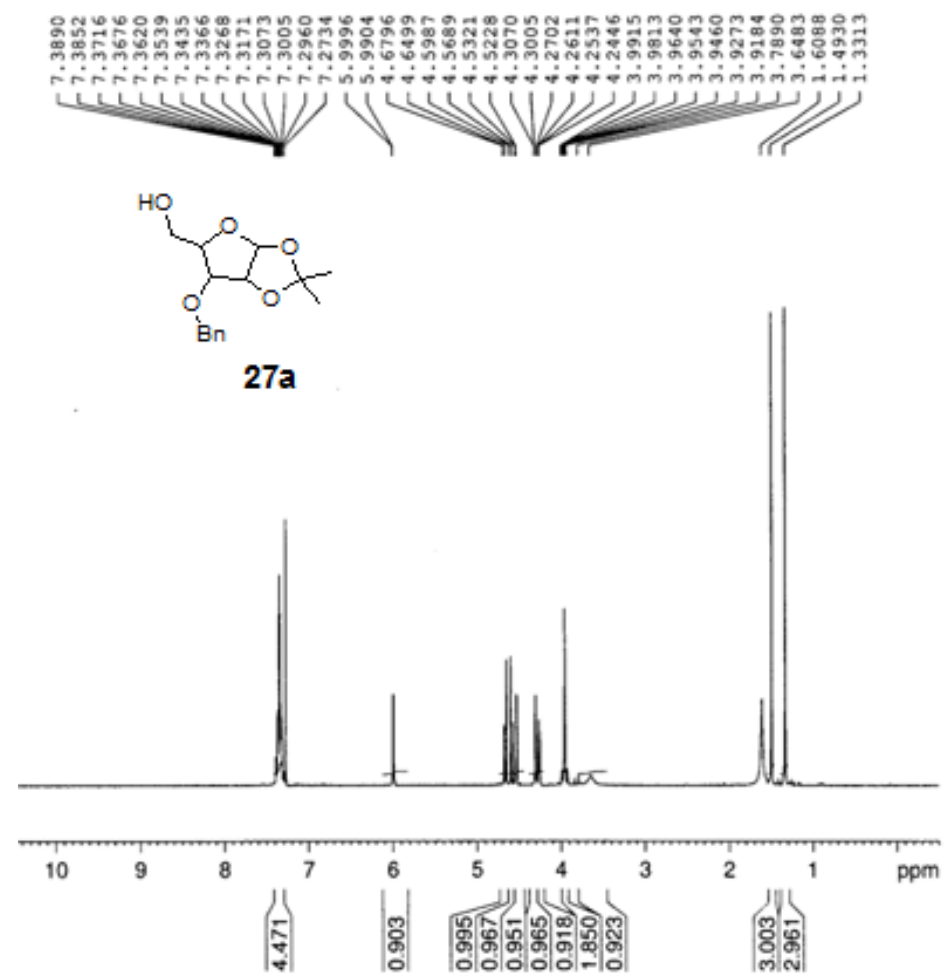

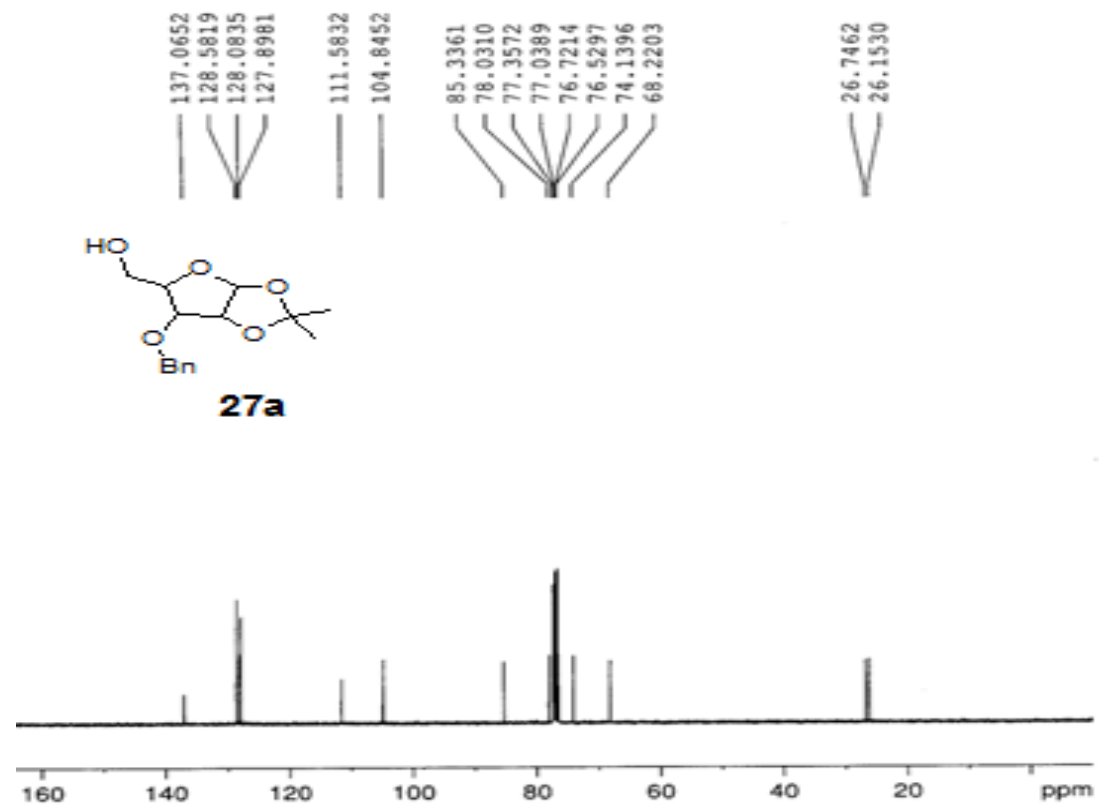

Supplement: c3ra42113a.pdf [file c3ra42113a.pdf]
